# Supplementary material for: Identification of the transcription factor ZEB1 as a central component of the adipogenic gene regulatory network
Source: eLife journal article supplement (doi:10.7554/elife.03346), 2014-08-26
Supplement: supp [file elife-03346-supp-v1.zip]

CONTROL

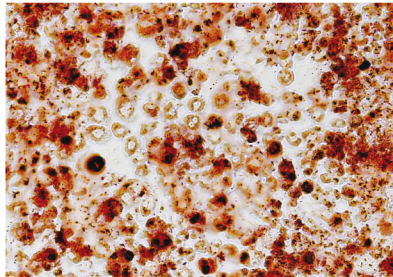

ZEB1 shRNA1

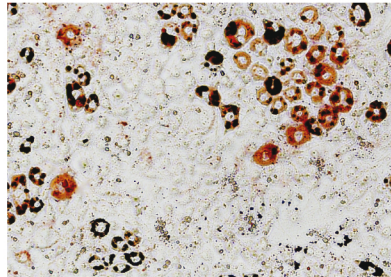

ZEB1 shRNA2

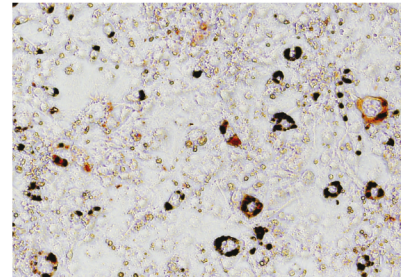

ZEB1 shRNA3

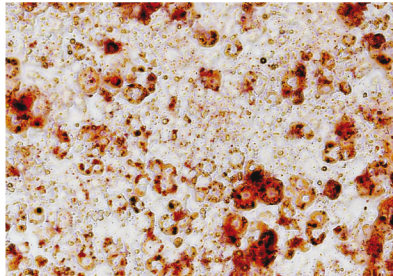

ZEB1 shRNA pool

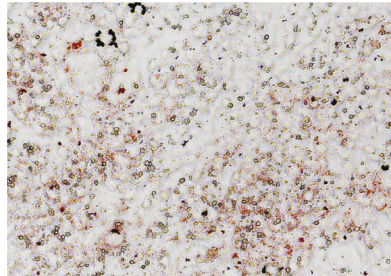

PPARG shRNA1

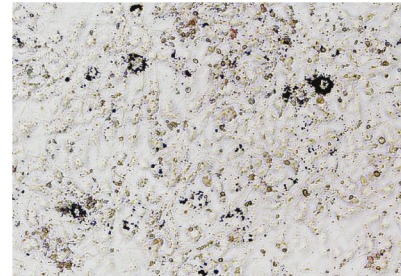

PPARG shRNA2

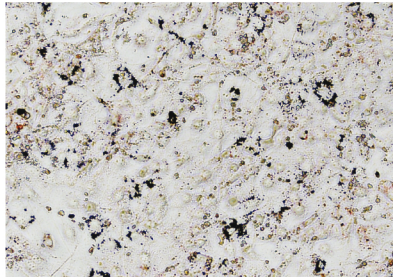

PPARG shRNA3

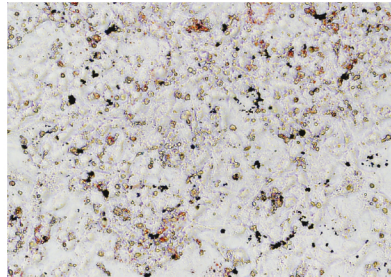

PPARG shRNA pool

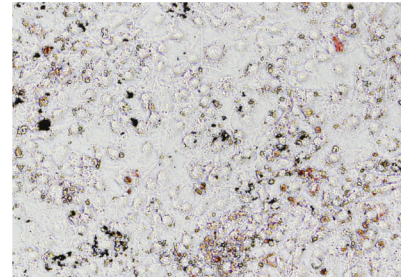

200  $\mu$ m
