# Supplementary material for: Identification of the transcription factor ZEB1 as a central component of the adipogenic gene regulatory network
Source: eLife journal article supplement (doi:10.7554/elife.03346), 2014-08-26

A

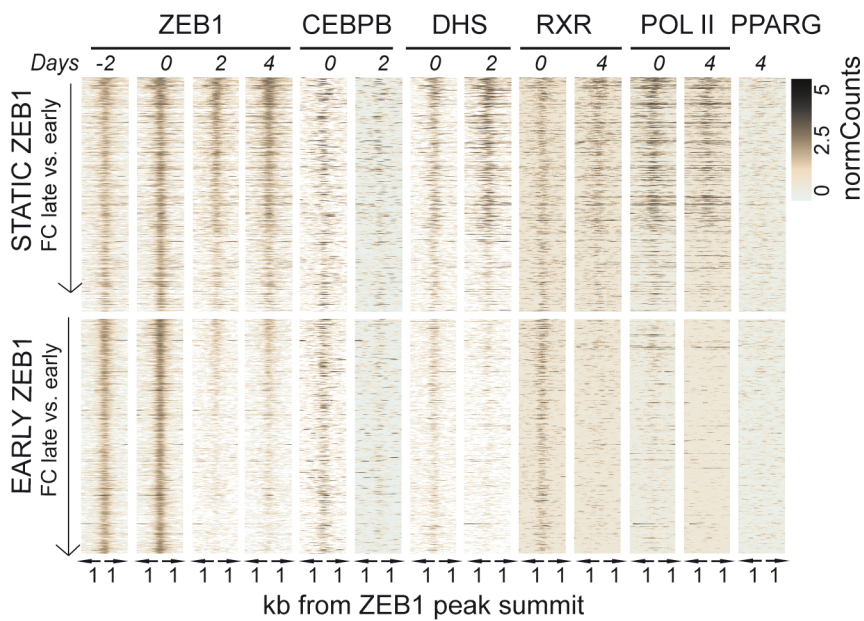

B

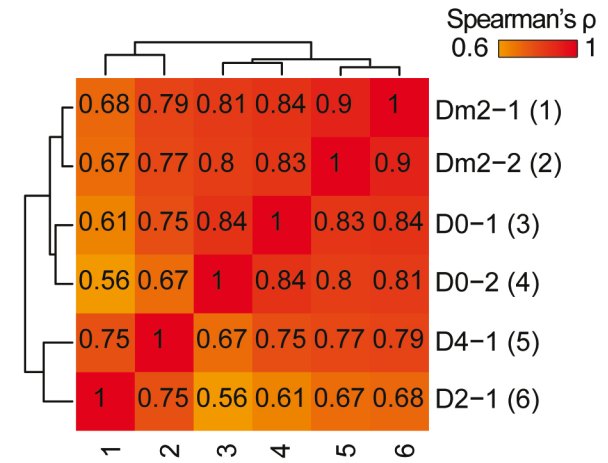

C

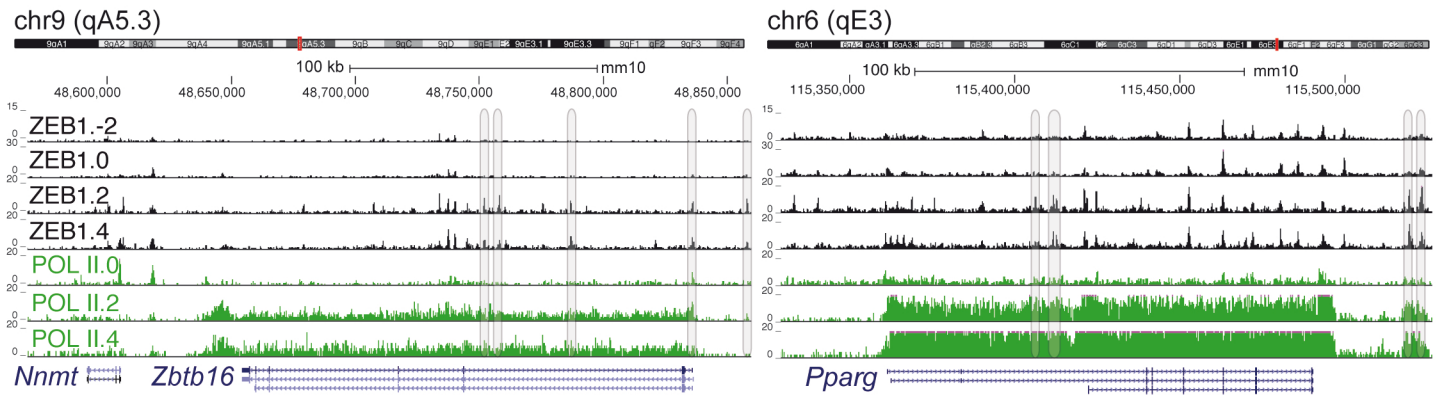

D

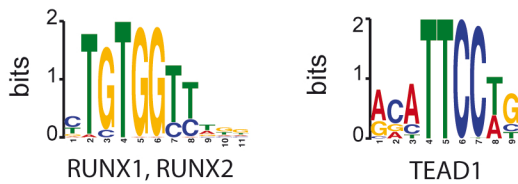

E

| GO Biological Process                         | -log <sub>10</sub> (p) |
|-----------------------------------------------|------------------------|
| chemokine(C-C motif) ligand 2 secretion       | 4.67                   |
| regulation of eosinophil degranulation        | 4.67                   |
| interleukin-10 secretion                      | 4.67                   |
| interferon-gamma secretion                    | 4.67                   |
| dendritic cell differentiation                | 4.67                   |
| negative regulation of TNF-mediated signaling | 4.43                   |

F

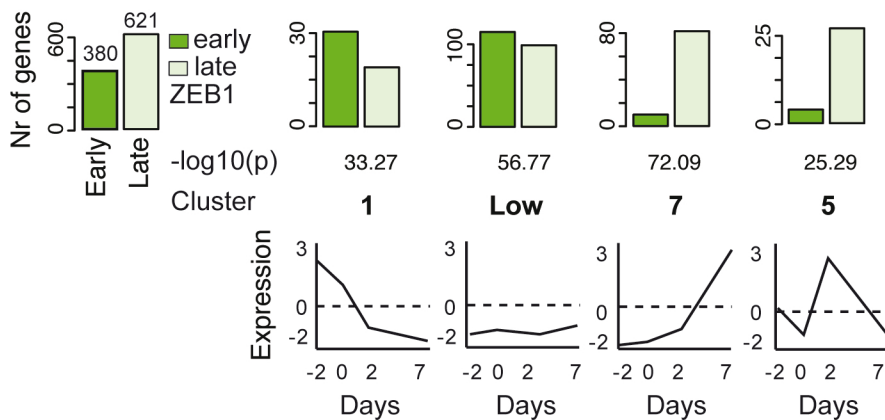

G

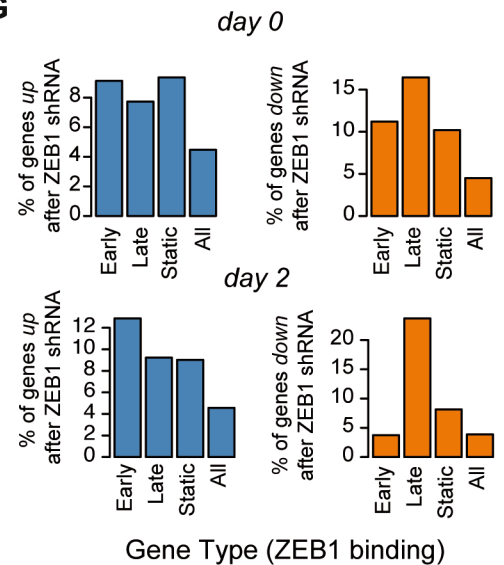

Supplement: supp [file elife-03346-supp-v1.zip]
