# Supplementary material for: Identification of the transcription factor ZEB1 as a central component of the adipogenic gene regulatory network
Source: eLife journal article supplement (doi:10.7554/elife.03346), 2014-08-26
Supplement: supp [file elife_poa_e03346_Supplementary_file_1.xlsx]

## Sheet: Table 1 - Screen
Gene	LD1	LD2	LD3	LD_avg	FC1	FC2	FC3	FC_avg	Pvalue1	Pvalue2	Pvalue3	Significant (Bonferroni alpha < 0.05 & FC > 1.5)	Transcribed (Re-analyzed Nielsen data (2008),cut off: 10tags/500bp)	Expression in 3T3-L1 (Tarjei data, 2010) (Expression Cluster)	Expression in hASC(Tarjei data, 2010)	ArrayExpress Adipose	Phenotype	Possible implication found before in adipogenesis
Zeb1	104.94	103.79	100.67	103.14	2.22	2.2	2.15	2.19	0	0	0	TRUE	TRUE	TRUE, High (H)	TRUE, High	High	TRUE	YES
Myog	86.21	84.37	86.22	85.6	1.82	1.79	1.84	1.82	0	0	0	TRUE	FALSE	LOW (L)	LOW	Average	NA	NO
Zfp30	82.14	87.39	82.08	83.87	1.74	1.85	1.75	1.78	0	0	0	TRUE	FALSE	TRUE (3)	TRUE, High	High	TRUE	NO
Ebf3	82.94	83.58	82.32	82.95	1.75	1.77	1.76	1.76	0	0	0	TRUE	TRUE	TRUE, High	TRUE	High	NA	YES
Trmt1	81.94	83.47	82.06	82.49	1.73	1.77	1.75	1.75	0	0	0	TRUE	TRUE	TRUE, High	TRUE, High	Low	NA	NO
Zfp277	81.1	78.35	79.84	79.76	1.71	1.66	1.7	1.69	0	0	0	TRUE	TRUE	TRUE, High	TRUE	Average	TRUE	NO
Zfp202	77.23	78.92	82.46	79.53	1.63	1.67	1.76	1.69	0	0	0	TRUE	TRUE	TRUE, High	TRUE, High	Average	FALSE	NO
Glis2	80.64	79.74	77.08	79.16	1.7	1.69	1.65	1.68	0	0	0	TRUE	TRUE	TRUE	TRUE	High	NA	YES
Zdhhc19	76.31	80.28	80.8	79.13	1.61	1.7	1.72	1.68	0	0	0	TRUE	FALSE	LOW	LOW	Low	NA	NO
Pparg	79.14	80.75	75.57	78.49	1.67	1.71	1.61	1.67	0	0	0	TRUE	TRUE	TRUE	TRUE, High	High	TRUE	YES
Sebox	79.04	78.83	76.74	78.21	1.67	1.67	1.64	1.66	0	0	0	TRUE	TRUE	LOW	LOW	Low	TRUE	NO
Lhx3	79.01	79.31	76.17	78.16	1.67	1.68	1.63	1.66	0	0	0	TRUE	FALSE	LOW	LOW	Low	NA	NO
Irf8	75.7	79.5	78.82	78.01	1.6	1.68	1.68	1.66	0	0	0	TRUE	FALSE	LOW	LOW	High	NA	NO
Barx2	77.49	78.81	76.72	77.67	1.64	1.67	1.64	1.65	0	0	0	TRUE	FALSE	LOW	LOW	Low	NA	NO
Zbtb43	76.45	76.21	79.95	77.54	1.62	1.61	1.71	1.65	0	0	0	TRUE	TRUE	TRUE, High	TRUE, High	Average	FALSE	NO
Atoh8	79.71	76.71	74.35	76.92	1.69	1.62	1.59	1.63	0	0	0	TRUE	TRUE	TRUE, High	TRUE	Average	TRUE	NO
Aire	77.67	75.63	76.98	76.76	1.64	1.6	1.64	1.63	0	0	0	TRUE	FALSE	LOW	LOW	Average	NA	NO
Hopx	75.17	75.78	77.84	76.26	1.59	1.61	1.66	1.62	0	0	0	TRUE	FALSE	TRUE, High	LOW	Low	NA	NO
Grhl3	78.3	74.22	75.59	76.04	1.66	1.57	1.61	1.61	0	0	0	TRUE	FALSE	LOW	LOW	Low	NA	NO
6030490I01Rik	76.7	77.43	72.39	75.51	1.62	1.64	1.55	1.6	0	0	0	TRUE	TRUE	TRUE	NO	Average	TRUE	NO
Foxj2	76.56	75.85	74.09	75.5	1.62	1.61	1.58	1.6	0	0	0	TRUE	TRUE	TRUE, High	TRUE, High	High	NA	NO
Rhox4a	75.28	75.7	74.52	75.17	1.59	1.6	1.59	1.6	0	0	0	TRUE	FALSE	NO		Average	NA	NO
Zfand5	74.4	75.47	73.56	74.48	1.57	1.6	1.57	1.58	0	0	0	TRUE	TRUE	TRUE, High	TRUE, High	Average	NA	NO
Tulp4	73.16	70.96	73.63	72.58	1.55	1.5	1.57	1.54	0	0	0	TRUE	TRUE	TRUE	TRUE, High	Low	NA	NO
BC050078	74.12	69.26	73.7	72.36	1.57	1.47	1.57	1.54	0	0	0	FALSE
Tox3	72.76	70.66	73.72	72.38	1.54	1.5	1.57	1.54	0	0	0	FALSE
Zfp286	70.65	72.58	74.01	72.41	1.49	1.54	1.58	1.54	0	0	0	FALSE
Msx1	73.96	70.85	71.35	72.05	1.56	1.5	1.52	1.53	0	0	0	TRUE	TRUE	TRUE	TRUE	High	NA	NO
Zbtb48	73.77	69.03	73.26	72.02	1.56	1.46	1.56	1.53	0	0	0	FALSE
Hoxa6	75.5	69.51	71.98	72.33	1.6	1.47	1.54	1.53	0	0	0	FALSE
Tsc22d3	72.42	71.12	71.74	71.76	1.53	1.51	1.53	1.52	0	0	0	TRUE	TRUE	TRUE	TRUE	High	NA	NO
Rabgef1	69.8	69.98	74.49	71.42	1.48	1.48	1.59	1.52	0	0	0	FALSE
Smarcc2	69.92	69.25	72.56	70.58	1.48	1.47	1.55	1.5	0	0	0	FALSE
E2f6	68.92	72.99	70.13	70.68	1.46	1.55	1.5	1.5	0	0	0	FALSE
Hnf1b	70.69	68.26	73.44	70.8	1.49	1.45	1.57	1.5	0	0	0	FALSE
Mkrn2	71.48	68.24	72.97	70.9	1.51	1.45	1.56	1.5	0	0	0	FALSE
Klf17	71.14	67.06	70.49	69.56	1.5	1.42	1.5	1.48	0	0	0	FALSE
Hoxa13	69.22	71.38	68.27	69.62	1.46	1.51	1.46	1.48	0	0	0	FALSE
Zfp668	72.15	66.83	70	69.66	1.53	1.42	1.49	1.48	0	0	0	FALSE
Gtf2h2	69.23	67.12	71.69	69.35	1.46	1.42	1.53	1.47	0	0	0	FALSE
Max	66.86	71.22	68.07	68.71	1.41	1.51	1.45	1.46	0	0	0	FALSE
Creb5	67.89	67.84	71.31	69.01	1.44	1.44	1.52	1.46	0	0	0	FALSE
Zfp692	68.18	66.23	70.04	68.15	1.44	1.4	1.5	1.45	0	0	0	FALSE
Gtf3a	66.1	68.72	69.87	68.23	1.4	1.46	1.49	1.45	0	0	0	FALSE
Osr2	67.44	69.38	67.36	68.06	1.43	1.47	1.44	1.44	0	0	0	FALSE
Zfp354c	66.98	68.52	66.06	67.19	1.42	1.45	1.41	1.43	0	0	0	FALSE
Hoxb6	66.33	66.98	68.29	67.2	1.4	1.42	1.46	1.43	0	0	0	FALSE
Rbm22	66.88	65.19	67.02	66.36	1.41	1.38	1.43	1.41	0	0	0	FALSE
Krba1	64.19	67.35	66.45	65.99	1.36	1.43	1.42	1.4	0	0	0	FALSE
Csde1	63.02	65.03	68.18	65.41	1.33	1.38	1.46	1.39	4e-08	0	0	FALSE
Rcor2	66.84	66.32	68.42	67.19	1.34	1.36	1.43	1.38	0	0	0	FALSE
BC066028	64.24	66.46	64.5	65.07	1.36	1.41	1.38	1.38	0	0	0	FALSE
Mbnl2	65.65	62.24	67.65	65.18	1.39	1.32	1.44	1.38	0	4.2e-07	0	FALSE
Tbx10	67	64.32	62.14	64.49	1.42	1.36	1.33	1.37	0	1e-08	0	FALSE
Mizf	64.7	64.46	62.57	63.91	1.37	1.37	1.34	1.36	0	1e-08	0	FALSE
Fezf1	65.73	63.57	62.49	63.93	1.39	1.35	1.33	1.36	0	4e-08	0	FALSE
4933426I21Rik	63.73	64.26	63.95	63.98	1.35	1.36	1.37	1.36	1e-08	1e-08	0	FALSE
Obox5	65.07	64.09	63.69	64.29	1.38	1.36	1.36	1.36	0	1e-08	0	FALSE
Ppp1r10	64.21	64.18	61.79	63.39	1.36	1.36	1.32	1.35	0	1e-08	0	FALSE
Rfx2	65.45	61.3	63.49	63.41	1.38	1.3	1.36	1.35	0	2.11e-06	0	FALSE
Zfp42	66.92	61.69	62.25	63.62	1.41	1.31	1.33	1.35	0	1.07e-06	0	FALSE
Dlx3	63.75	62.43	62.58	62.92	1.35	1.32	1.34	1.34	1e-08	3e-07	0	FALSE
Zfp260	62.26	66.92	59.97	63.05	1.32	1.42	1.28	1.34	1.8e-07	0	0	FALSE
Hmgb2	64.59	64.17	65.36	64.7	1.3	1.32	1.37	1.33	0	0	0	FALSE
Zfp811	63.92	59.02	63.39	62.11	1.35	1.25	1.35	1.32	1e-08	6.963e-05	0	FALSE
Zfp810	60.55	60.47	63.46	61.49	1.28	1.28	1.35	1.31	3.76e-06	7.95e-06	0	FALSE
Nr2f6	61.36	63.53	59.68	61.52	1.3	1.35	1.27	1.31	9.3e-07	4e-08	0	FALSE
Tshz2	63.33	60.31	61.75	61.8	1.34	1.28	1.32	1.31	2e-08	1.026e-05	0	FALSE
Pknox2	66.38	63.13	62.73	64.08	1.33	1.3	1.31	1.31	0	0	0	FALSE
Nfxl1	61.78	59.92	63.83	61.84	1.31	1.27	1.36	1.31	4.4e-07	1.862e-05	0	FALSE
Rhox11	56.93	62.67	63.58	61.06	1.2	1.33	1.36	1.3	0	1.9e-07	0	FALSE
Tead4	61.41	63.54	63.41	62.79	1.23	1.3	1.32	1.29	0	0	0	FALSE
Gmeb2	60.3	61.89	60.22	60.81	1.27	1.31	1.29	1.29	5.7e-06	7.6e-07	0	FALSE
Farsa	59.46	62.32	57.29	59.69	1.26	1.32	1.22	1.27	2.192e-05	3.6e-07	9e-08	FALSE
Nhlh2	62.81	59.95	63.12	61.96	1.26	1.23	1.32	1.27	0	1e-08	0	FALSE
Zkscan6	61.93	59.09	58.51	59.84	1.31	1.25	1.25	1.27	3.3e-07	6.344e-05	0	FALSE
Pbx3	62.04	63.27	61.08	62.13	1.24	1.3	1.28	1.27	0	0	0	FALSE
4932411N23Rik	62.8	59.94	63.79	62.18	1.26	1.23	1.33	1.27	0	1e-08	0	FALSE
Foxi2	61.33	63.35	59.27	61.32	1.23	1.3	1.24	1.26	0	0	2e-08	FALSE
9130023H24Rik	60.16	61.11	62.65	61.31	1.21	1.25	1.31	1.26	1.1e-07	0	0	FALSE
Klf7	60.87	60.47	56.52	59.29	1.29	1.28	1.21	1.26	2.19e-06	7.97e-06	7.4e-07	FALSE
Zfp280b	57.78	60.01	60.58	59.46	1.22	1.27	1.29	1.26	0	1.632e-05	0	FALSE
Zbtb26	56.34	61.34	60.85	59.51	1.19	1.3	1.3	1.26	0	1.94e-06	0	FALSE
Dpm1	59.02	56.42	60.64	58.69	1.25	1.19	1.29	1.25	4.28e-05	0	0	FALSE
Nr1h2	60.48	59.49	62.55	60.84	1.21	1.22	1.31	1.25	5e-08	3e-08	0	FALSE
Pias2	59.62	59.63	57.48	58.91	1.26	1.26	1.23	1.25	1.699e-05	2.868e-05	5e-08	FALSE
Nfe2l2	59.51	60.33	61.13	60.32	1.19	1.24	1.28	1.24	6.6e-07	0	0	FALSE
Hoxa9	57.13	58.84	58.89	58.29	1.21	1.25	1.26	1.24	0	8.974e-05	0	FALSE
Hoxb2	56.72	58.1	60.41	58.41	1.2	1.23	1.29	1.24	0	0	0	FALSE
Six6	58.83	60.31	62.73	60.62	1.18	1.24	1.31	1.24	3.85e-06	0	0	FALSE
Rbak	59.11	56.42	60.31	58.61	1.25	1.2	1.29	1.24	3.781e-05	0	0	FALSE
Rhox6	55.87	56.44	60.84	57.72	1.18	1.2	1.3	1.23	0	0	0	FALSE
Zfp472	60.07	60.28	59.22	59.86	1.2	1.24	1.24	1.23	1.4e-07	0	3e-08	FALSE
Tead1	58.35	61.75	60.02	60.04	1.17	1.27	1.25	1.23	1.23e-05	0	0	FALSE
Ovol1	60.34	60.2	59.73	60.09	1.21	1.23	1.25	1.23	7e-08	0	1e-08	FALSE
Myf6	59.51	62.79	58.06	60.12	1.19	1.29	1.21	1.23	6.7e-07	0	5.9e-07	FALSE
Zfp28	58.96	57.32	58.26	58.18	1.25	1.21	1.24	1.23	4.698e-05	0	1e-08	FALSE
Mbd3	56.82	58.16	56.86	57.28	1.2	1.23	1.21	1.22	0	0	2.9e-07	FALSE
Six1	61.38	58.35	58.46	59.4	1.23	1.2	1.22	1.22	0	7.7e-07	2.1e-07	FALSE
Creb3l3	58.38	61.77	58.23	59.46	1.17	1.27	1.22	1.22	1.134e-05	0	3.8e-07	FALSE
Barhl2	57.7	59.85	54.69	57.41	1.22	1.27	1.17	1.22	0	2.092e-05	5.958e-05	FALSE
Nfe2l1	59.9	57.92	60.62	59.48	1.2	1.19	1.27	1.22	2.3e-07	2.36e-06	0	FALSE
8430426H19Rik	57.85	59.66	54.82	57.44	1.22	1.26	1.17	1.22	0	2.77e-05	4.443e-05	FALSE
Zfp455	60.45	59.01	59.35	59.61	1.21	1.21	1.24	1.22	5e-08	1.3e-07	2e-08	FALSE
1700029I01Rik	59.73	58.45	54.57	57.58	1.26	1.24	1.16	1.22	1.425e-05	0	7.726e-05	FALSE
Stat4	59.79	59.03	60.14	59.65	1.2	1.21	1.26	1.22	3.1e-07	1.2e-07	0	FALSE
Mael	59.91	61.12	57.98	59.67	1.2	1.25	1.21	1.22	2.2e-07	0	7.3e-07	FALSE
Rxra	58.78	60.35	59.85	59.66	1.18	1.24	1.25	1.22	4.37e-06	0	0	FALSE
Zic1	59.86	59.88	59.47	59.74	1.2	1.23	1.24	1.22	2.6e-07	1e-08	1e-08	FALSE
Nkx3-1	60.73	58.55	57.28	58.86	1.22	1.2	1.2	1.21	2e-08	4.5e-07	3.97e-06	FALSE
Hes2	60.95	58.24	57.5	58.9	1.22	1.19	1.2	1.21	1e-08	1.04e-06	2.35e-06	FALSE
Batf2	56.36	60.08	54.21	56.88	1.19	1.27	1.16	1.21	0	1.476e-05	0	FALSE
Bmyc	61.52	57.71	57.69	58.97	1.23	1.18	1.2	1.21	0	4.03e-06	1.5e-06	FALSE
Sall3	59.3	57.74	60.37	59.13	1.19	1.18	1.26	1.21	1.17e-06	3.75e-06	0	FALSE
Hmgn3	59.8	57.56	60.39	59.25	1.2	1.18	1.26	1.21	3e-07	5.75e-06	0	FALSE
Zgpat	55.04	57.7	58.83	57.19	1.16	1.22	1.26	1.21	0.01	0	0	FALSE
Mybl2	57.62	58.55	58.9	58.35	1.16	1.2	1.23	1.2	6.465e-05	4.6e-07	7e-08	FALSE
Meox1	58.97	59.42	57.09	58.49	1.18	1.22	1.19	1.2	2.69e-06	4e-08	6.22e-06	FALSE
Tcfcp2l1	58.31	60.09	57.37	58.59	1.17	1.23	1.2	1.2	1.348e-05	1e-08	3.22e-06	FALSE
Tcfap2d	59.51	58.18	58.37	58.69	1.19	1.19	1.22	1.2	6.7e-07	1.22e-06	2.6e-07	FALSE
Zfp791	56.26	55.6	55.76	55.87	1.19	1.18	1.19	1.19	0	0	5.06e-06	FALSE
Elk1	58.48	58.08	57.3	57.95	1.17	1.19	1.2	1.19	8.95e-06	1.59e-06	3.81e-06	FALSE
2410081M15Rik	58.39	56.36	59.12	57.96	1.17	1.16	1.23	1.19	1.124e-05	8.984e-05	3e-08	FALSE
Dmrt1	56.56	55.28	56.08	55.98	1.2	1.17	1.2	1.19	0	0.01	2.29e-06	FALSE
Hmgb2l1	54.81	57.11	56.05	55.99	1.16	1.21	1.2	1.19	0.01	0	2.46e-06	FALSE
Nr2e3	57.84	57.73	58.47	58.01	1.16	1.18	1.22	1.19	4.01e-05	3.76e-06	2.1e-07	FALSE
Atf7	58.01	56.53	59.56	58.03	1.16	1.16	1.24	1.19	2.718e-05	6.266e-05	1e-08	FALSE
Zfp93	57.19	59.6	57.42	58.07	1.15	1.22	1.2	1.19	0	2e-08	2.84e-06	FALSE
Tcf12	54.75	57.56	55.9	56.07	1.16	1.22	1.19	1.19	0.01	0	3.63e-06	FALSE
Zkscan3	57.35	56.9	54.02	56.09	1.21	1.21	1.15	1.19	0	0	0	FALSE
Sp4	53.52	55.38	59.35	56.08	1.13	1.17	1.27	1.19	0.03	0.01	0	FALSE
Zfp488	54.65	57.79	56.07	56.17	1.16	1.22	1.2	1.19	0.01	0	2.36e-06	FALSE
Elf4	56.82	60.56	57.23	58.2	1.14	1.24	1.2	1.19	0	0	4.53e-06	FALSE
Zfp40	58.32	58.28	58.34	58.31	1.17	1.2	1.22	1.19	1.317e-05	9.4e-07	2.9e-07	FALSE
Nr4a1	58.25	57.07	57.01	57.44	1.17	1.17	1.19	1.18	1.569e-05	1.843e-05	7.56e-06	FALSE
Hmgb4	58.75	56.11	57.66	57.51	1.18	1.15	1.2	1.18	4.69e-06	0	1.59e-06	FALSE
Elf2	55.66	58.93	58.15	57.58	1.12	1.21	1.21	1.18	0	1.6e-07	4.7e-07	FALSE
Gm239	56.88	58.14	57.91	57.65	1.14	1.19	1.21	1.18	0	1.34e-06	8.6e-07	FALSE
Mta2	59.52	58.49	55.19	57.73	1.19	1.2	1.15	1.18	6.5e-07	5.3e-07	0	FALSE
Esrra	58.94	56.75	57.64	57.78	1.18	1.16	1.2	1.18	2.89e-06	3.818e-05	1.69e-06	FALSE
Zfp64	57	54.37	56.01	55.8	1.21	1.15	1.2	1.18	0	0.02	2.71e-06	FALSE
Zfp521	59.19	57.47	56.88	57.85	1.19	1.18	1.19	1.18	1.55e-06	7.12e-06	1.023e-05	FALSE
Spdef	59.19	56.4	55.3	56.96	1.19	1.16	1.16	1.17	1.56e-06	8.255e-05	0	FALSE
Rnf113a2	52.79	55.34	56.82	54.98	1.12	1.17	1.21	1.17	0.06	0.01	3.3e-07	FALSE
Creb3l2	55.56	58.1	57.53	57.06	1.11	1.19	1.2	1.17	0	1.5e-06	2.21e-06	FALSE
cbx2	55.98	56.95	58.3	57.08	1.12	1.17	1.22	1.17	0	2.421e-05	3.2e-07	FALSE
Zfp580	53.79	56.36	55.56	55.24	1.14	1.19	1.19	1.17	0.02	0	8.17e-06	FALSE
Hoxb13	56.44	57.58	57.68	57.23	1.13	1.18	1.2	1.17	0	5.5e-06	1.52e-06	FALSE
Nr1i2	57.85	55.61	58.28	57.25	1.16	1.14	1.22	1.17	3.892e-05	0	3.3e-07	FALSE
Mycs	54.28	58.77	58.62	57.22	1.09	1.21	1.22	1.17	0.02	2.5e-07	1.4e-07	FALSE
Obox3	56.89	58.38	56.56	57.28	1.14	1.2	1.18	1.17	0	7.2e-07	2.081e-05	FALSE
Prosapip1	53.73	53.56	56.62	54.64	1.14	1.13	1.21	1.16	0.02	0.03	5.7e-07	FALSE
Lass4	57.54	58.06	54.78	56.8	1.15	1.19	1.14	1.16	7.672e-05	1.64e-06	0	FALSE
Foxi1	58.12	55.83	56.51	56.82	1.17	1.15	1.18	1.16	2.105e-05	0	2.29e-05	FALSE
Zfp709	52.07	55.34	57.19	54.86	1.1	1.17	1.22	1.16	0.1	0.01	1.2e-07	FALSE
Prdm1	56.05	54.16	57.58	55.93	1.12	1.11	1.2	1.15	0	0.01	1.97e-06	FALSE
Zfp282	53.3	53.79	55.35	54.14	1.13	1.14	1.18	1.15	0.04	0.03	1.357e-05	FALSE
Nfya	56.14	56.13	56.15	56.14	1.13	1.15	1.17	1.15	0	0	4.987e-05	FALSE
Tgif2	56.95	57.55	54.24	56.25	1.14	1.18	1.13	1.15	0	5.87e-06	0	FALSE
Rfx3	55.88	56.01	56.92	56.27	1.12	1.15	1.19	1.15	0	0	9.34e-06	FALSE
Fosl2	57.22	55.4	56.3	56.31	1.15	1.14	1.18	1.15	0	0	3.639e-05	FALSE
Crebl2	57.38	53.32	52.34	54.35	1.21	1.13	1.12	1.15	0	0.04	0	FALSE
Mef2d	55.15	55.29	58.51	56.32	1.11	1.13	1.22	1.15	0.01	0	1.8e-07	FALSE
Rbpj	54.31	54.06	54.85	54.41	1.15	1.15	1.17	1.15	0.01	0.02	4.153e-05	FALSE
E2f3	54.52	57.54	57.02	56.36	1.09	1.18	1.19	1.15	0.02	6e-06	7.33e-06	FALSE
Nr1i3	56.27	54.91	55.27	55.48	1.13	1.13	1.15	1.14	0	0	0	FALSE
Zfp113	53.7	54.8	57.88	55.46	1.08	1.12	1.21	1.14	0.05	0	9.4e-07	FALSE
Myod1	53.57	56	56.84	55.47	1.07	1.15	1.19	1.14	0.06	0	1.113e-05	FALSE
Hoxa7	54.38	54.89	57.25	55.51	1.09	1.13	1.2	1.14	0.02	0	4.35e-06	FALSE
Gcm2	56.22	51.34	53.25	53.6	1.19	1.09	1.14	1.14	0	0.16	0	FALSE
Rarg	53.06	56.09	51.78	53.64	1.12	1.19	1.11	1.14	0.04	0	0.01	FALSE
Obox1	56.17	54.15	56.42	55.58	1.13	1.11	1.18	1.14	0	0.01	2.797e-05	FALSE
Zfp513	56.52	55.66	54.71	55.63	1.13	1.14	1.14	1.14	0	0	0	FALSE
Hmgb1	53.04	56.56	57.23	55.61	1.06	1.16	1.2	1.14	0.1	5.887e-05	4.49e-06	FALSE
Fezf2	51.42	55.33	54.39	53.71	1.09	1.17	1.16	1.14	0.15	0.01	0	FALSE
E2f2	54.69	57.84	54.58	55.71	1.1	1.19	1.14	1.14	0.01	2.86e-06	0	FALSE
Nr2e1	55.64	57.37	54.15	55.72	1.12	1.18	1.13	1.14	0	9.21e-06	0	FALSE
Prox1	56.62	56.25	54.54	55.8	1.14	1.15	1.14	1.14	0	0	0	FALSE
Repin1	54.74	55.17	51.93	53.95	1.16	1.17	1.11	1.14	0.01	0.01	0.01	FALSE
Zfp157	53.97	54.29	50.82	53.03	1.14	1.15	1.08	1.13	0.02	0.02	0.04	FALSE
Pias3	55.22	55.72	54.35	55.1	1.11	1.14	1.14	1.13	0.01	0	0	FALSE
Nfe2	54.31	55.58	55.39	55.09	1.09	1.14	1.16	1.13	0.02	0	0	FALSE
Pou2f1	55.7	55.12	54.76	55.19	1.12	1.13	1.14	1.13	0	0	0	FALSE
Nkx2-2	56.22	54.5	54.87	55.2	1.13	1.12	1.15	1.13	0	0	0	FALSE
E430018J23Rik	55.97	51.42	52.48	53.29	1.18	1.09	1.12	1.13	0	0.16	0	FALSE
Sfpi1	55.88	54.59	55.25	55.24	1.12	1.12	1.15	1.13	0	0	0	FALSE
Fos	55.78	53.68	56.27	55.24	1.12	1.1	1.18	1.13	0	0.01	3.874e-05	FALSE
A830053O21Rik	54.65	54.95	56.27	55.29	1.1	1.13	1.18	1.13	0.01	0	3.902e-05	FALSE
Rorc	55.68	54.63	55.71	55.34	1.12	1.12	1.16	1.13	0	0	0	FALSE
Fkhl18	57.3	54.54	54.28	55.37	1.15	1.12	1.13	1.13	0	0	0	FALSE
Zfp105	58.01	53.86	54.3	55.39	1.16	1.1	1.13	1.13	2.724e-05	0.01	0	FALSE
Batf	55.21	56.82	54.18	55.4	1.11	1.17	1.13	1.13	0.01	3.302e-05	0	FALSE
Mta1	54.24	52.97	56.26	54.49	1.09	1.09	1.17	1.12	0.02	0.03	3.98e-05	FALSE
Mxd3	52.78	56.27	54.48	54.51	1.06	1.15	1.14	1.12	0.13	0	0	FALSE
Elk3	54.69	54.29	54.75	54.58	1.1	1.11	1.14	1.12	0.01	0	0	FALSE
Zfp61	53.56	55.27	55.11	54.65	1.07	1.13	1.15	1.12	0.06	0	0	FALSE
Fosl1	54.53	53.68	56.07	54.76	1.09	1.1	1.17	1.12	0.02	0.01	5.853e-05	FALSE
tcf7	53.88	54.93	55.53	54.78	1.08	1.13	1.16	1.12	0.04	0	0	FALSE
Zfp629	55.82	54.67	53.98	54.82	1.12	1.12	1.13	1.12	0	0	0	FALSE
Mef2c	55.98	55.27	53.26	54.84	1.12	1.13	1.11	1.12	0	0	0.01	FALSE
E2f5	52.82	56.14	55.51	54.82	1.06	1.15	1.16	1.12	0.13	0	0	FALSE
Pias4	56.51	55.23	52.86	54.87	1.13	1.13	1.1	1.12	0	0	0.01	FALSE
D330038O06Rik	52.97	55.52	56.07	54.85	1.06	1.14	1.17	1.12	0.11	0	5.836e-05	FALSE
OTTMUSG00000016571	55.92	50.09	52.89	52.96	1.18	1.06	1.13	1.12	0	0.33	0	FALSE
Trerf1	53.02	55.76	53.28	54.02	1.06	1.14	1.11	1.11	0.1	0	0.01	FALSE
Hif1a	52.35	55.03	54.7	54.03	1.05	1.13	1.14	1.11	0.2	0	0	FALSE
Zfp346	50.29	52.8	53.47	52.19	1.06	1.12	1.14	1.11	0.3	0.06	0	FALSE
Meox2	54.26	54.42	53.64	54.11	1.09	1.12	1.12	1.11	0.02	0	0	FALSE
Zfp354a	50.97	52.87	52.9	52.25	1.08	1.12	1.13	1.11	0.2	0.06	0	FALSE
Ppara	53.93	54.13	54.38	54.15	1.08	1.11	1.14	1.11	0.04	0.01	0	FALSE
D8Ertd457e	55.95	54.34	52.28	54.19	1.12	1.11	1.09	1.11	0	0	0.03	FALSE
Tead2	55.71	54.46	52.43	54.2	1.12	1.12	1.1	1.11	0	0	0.03	FALSE
Hlf	53.68	54.25	54.62	54.18	1.08	1.11	1.14	1.11	0.05	0	0	FALSE
Crx	55.63	55.64	51.9	54.39	1.12	1.14	1.08	1.11	0	0	0.05	FALSE
Nr5a1	54.71	53.31	55.23	54.42	1.1	1.09	1.15	1.11	0.01	0.02	0	FALSE
Vax2	51.96	52.88	52.74	52.53	1.1	1.12	1.13	1.11	0.1	0.06	0	FALSE
Mbnl3	53.14	51.83	50.01	51.66	1.12	1.1	1.07	1.1	0.04	0.12	0.1	FALSE
Myf5	53.18	52.7	54.71	53.53	1.07	1.08	1.14	1.1	0.09	0.04	0	FALSE
Ahr	54.52	51.9	54.34	53.58	1.09	1.06	1.13	1.1	0.02	0.11	0	FALSE
Gabpa	54.85	53.6	52.56	53.67	1.1	1.1	1.1	1.1	0.01	0.01	0.02	FALSE
Zic3	55.47	54.05	51.56	53.7	1.11	1.11	1.08	1.1	0	0.01	0.07	FALSE
Rfx1	53.68	53.43	54.12	53.75	1.08	1.1	1.13	1.1	0.05	0.02	0	FALSE
Srcap	53.75	54.89	52.7	53.78	1.08	1.13	1.1	1.1	0.05	0	0.02	FALSE
Pax9	55.21	51.99	54.32	53.84	1.11	1.07	1.13	1.1	0.01	0.1	0	FALSE
Prrxl1	53.42	53.25	54.89	53.85	1.07	1.09	1.15	1.1	0.07	0.02	0	FALSE
Lmx1a	53.69	55.6	52.56	53.95	1.08	1.14	1.1	1.1	0.05	0	0.02	FALSE
Arnt	55.97	52.12	51.15	53.08	1.12	1.07	1.07	1.09	0	0.08	0.11	FALSE
Smad2	51.42	51.42	56.21	53.02	1.03	1.05	1.17	1.09	0.42	0.17	4.352e-05	FALSE
Tcfap4	52.27	55.08	51.83	53.06	1.05	1.13	1.08	1.09	0.22	0	0.05	FALSE
Zscan20	49.27	55.68	49.03	51.33	1.04	1.18	1.05	1.09	0.49	0	0.26	FALSE
Ddit3	54.2	53.78	51.61	53.19	1.09	1.1	1.08	1.09	0.03	0.01	0.07	FALSE
Esrrb	49.49	54.26	50.53	51.43	1.05	1.15	1.08	1.09	0.45	0.02	0.06	FALSE
Zfp710	48.2	54.18	52.04	51.47	1.02	1.15	1.11	1.09	0.75	0.02	0.01	FALSE
BC043476	54	53.84	52.21	53.35	1.08	1.1	1.09	1.09	0.03	0.01	0.03	FALSE
Nfil3	52.3	52.82	54.89	53.34	1.05	1.08	1.15	1.09	0.21	0.04	0	FALSE
Toe1	52.49	54.14	51.01	52.55	1.05	1.11	1.07	1.08	0.18	0.01	0.12	FALSE
Pbrm1	52.59	53.15	51.93	52.56	1.05	1.09	1.08	1.08	0.16	0.02	0.05	FALSE
Zfp637	51.35	50.12	50.82	50.76	1.09	1.06	1.09	1.08	0.16	0.33	0.04	FALSE
Nr0b1	54.12	52.76	51.1	52.66	1.09	1.08	1.07	1.08	0.03	0.04	0.11	FALSE
Creb3	53.53	52.27	52.16	52.65	1.07	1.07	1.09	1.08	0.06	0.07	0.04	FALSE
Smad3	53	53.62	51.5	52.71	1.06	1.1	1.08	1.08	0.11	0.01	0.08	FALSE
Gata5	52.29	54.2	51.63	52.7	1.05	1.11	1.08	1.08	0.21	0.01	0.07	FALSE
Dr1	52	53	53.09	52.7	1.04	1.09	1.11	1.08	0.27	0.03	0.01	FALSE
Smad9	52.02	53.78	52.33	52.71	1.04	1.1	1.09	1.08	0.27	0.01	0.03	FALSE
Hey1	50	54.24	53.92	52.72	1	1.11	1.13	1.08	0.95	0	0	FALSE
Bhlhb4	50.86	53.95	53.54	52.78	1.02	1.11	1.12	1.08	0.61	0.01	0.01	FALSE
Csdc2	48.26	52.09	52.61	50.99	1.02	1.1	1.12	1.08	0.74	0.1	0	FALSE
Tbx21	53.87	52.07	52.8	52.91	1.08	1.07	1.1	1.08	0.04	0.09	0.02	FALSE
Gata2	53.16	52.06	53.6	52.94	1.07	1.07	1.12	1.08	0.09	0.09	0.01	FALSE
Dbx1	50.11	52.21	51	51.1	1.06	1.11	1.09	1.08	0.33	0.09	0.03	FALSE
Hes3	52.75	52.86	53.25	52.95	1.06	1.08	1.11	1.08	0.14	0.03	0.01	FALSE
Nfib	51.34	52	52.61	51.98	1.03	1.07	1.1	1.07	0.45	0.09	0.02	FALSE
Erf	54.12	50.98	51.04	52.05	1.09	1.05	1.07	1.07	0.03	0.25	0.12	FALSE
Six2	52.73	49.69	48.26	50.23	1.11	1.05	1.03	1.07	0.06	0.4	0.47	FALSE
Tut1	52.07	48.35	50.32	50.25	1.1	1.02	1.07	1.07	0.1	0.7	0.08	FALSE
Ptf1a	50.61	53.45	52.12	52.06	1.01	1.1	1.09	1.07	0.7	0.02	0.04	FALSE
Klf15	52.98	50.91	52.36	52.08	1.06	1.04	1.09	1.07	0.11	0.27	0.03	FALSE
Bach2	54.29	51.39	50.85	52.18	1.09	1.05	1.06	1.07	0.02	0.17	0.14	FALSE
Dmrtc2	52.45	52.27	51.84	52.19	1.05	1.07	1.08	1.07	0.18	0.07	0.05	FALSE
Vdr	51.17	52.9	53.08	52.38	1.03	1.09	1.11	1.07	0.5	0.03	0.01	FALSE
Cdx2	53.83	52.58	50.86	52.43	1.08	1.08	1.06	1.07	0.04	0.05	0.14	FALSE
C330016O10Rik	50.63	50.3	50.87	50.6	1.07	1.07	1.09	1.07	0.24	0.3	0.04	FALSE
Foxp2	53.34	50.49	53.47	52.44	1.07	1.04	1.12	1.07	0.07	0.37	0.01	FALSE
Zdhhc1	53.36	50.97	50.27	51.53	1.07	1.05	1.05	1.06	0.07	0.25	0.24	FALSE
Ikbkg	50.3	53.5	50.72	51.51	1.01	1.1	1.06	1.06	0.82	0.01	0.16	FALSE
Ascl2	50.87	52.54	51.62	51.68	1.02	1.08	1.08	1.06	0.61	0.05	0.07	FALSE
Atf4	53.4	49.6	52.19	51.73	1.07	1.02	1.09	1.06	0.07	0.66	0.03	FALSE
Zscan12	49.2	47.97	52.57	49.91	1.04	1.02	1.12	1.06	0.51	0.8	0	FALSE
Pax2	52.28	51.31	51.63	51.74	1.05	1.05	1.08	1.06	0.21	0.19	0.07	FALSE
Bcl6b	52.5	51.45	51.3	51.75	1.05	1.06	1.07	1.06	0.17	0.16	0.09	FALSE
Hnf4g	50.12	53.35	51.85	51.77	1.01	1.09	1.08	1.06	0.9	0.02	0.05	FALSE
Neurog3	53.69	52.78	48.99	51.82	1.08	1.08	1.02	1.06	0.05	0.04	0.59	FALSE
Nr2c1	52.31	52.51	50.85	51.89	1.05	1.08	1.06	1.06	0.21	0.05	0.14	FALSE
Esr2	50.87	52.11	52.62	51.87	1.02	1.07	1.1	1.06	0.61	0.08	0.02	FALSE
Foxj3	51.39	53.36	51.12	51.95	1.03	1.09	1.07	1.06	0.43	0.02	0.11	FALSE
Zfp13	53.93	52.35	49.69	51.99	1.08	1.07	1.04	1.06	0.04	0.06	0.37	FALSE
Ets2	52.77	50.16	50.22	51.05	1.06	1.03	1.05	1.05	0.13	0.47	0.25	FALSE
Thap3	51.48	48.61	47.83	49.31	1.09	1.03	1.02	1.05	0.14	0.64	0.61	FALSE
Arid3a	50.37	52.34	50.57	51.09	1.01	1.07	1.06	1.05	0.8	0.06	0.19	FALSE
Spic	49.95	52.14	51.21	51.1	1	1.07	1.07	1.05	0.97	0.08	0.1	FALSE
Zdhhc6	51.1	51.76	50.68	51.18	1.02	1.06	1.06	1.05	0.53	0.12	0.17	FALSE
Zfp192	49.8	48.43	50.05	49.42	1.05	1.03	1.07	1.05	0.38	0.68	0.1	FALSE
Jundm2	49.19	50.15	49.24	49.53	1.04	1.06	1.05	1.05	0.51	0.32	0.22	FALSE
E2f7	51.48	51.12	51.36	51.32	1.03	1.05	1.07	1.05	0.41	0.22	0.09	FALSE
Elf1	51.13	50.72	52.08	51.31	1.03	1.04	1.09	1.05	0.52	0.31	0.04	FALSE
A630042L21Rik	50.62	53.08	50.37	51.36	1.02	1.09	1.05	1.05	0.7	0.03	0.22	FALSE
Mlx	49.94	48.9	49.87	49.57	1.06	1.04	1.06	1.05	0.36	0.57	0.12	FALSE
Zfp568	51.69	50.89	51.55	51.38	1.04	1.04	1.08	1.05	0.35	0.27	0.07	FALSE
Egr1	53.07	49.28	51.85	51.4	1.06	1.01	1.08	1.05	0.1	0.78	0.05	FALSE
Nfkb1	48.62	50.94	49.48	49.68	1.03	1.08	1.06	1.05	0.65	0.21	0.18	FALSE
Relb	52.04	51.85	50.58	51.49	1.04	1.06	1.06	1.05	0.26	0.11	0.18	FALSE
Lass5	51.49	48.77	51.74	50.67	1.03	1	1.08	1.04	0.4	0.99	0.06	FALSE
Zfp523	51.72	51.99	48.52	50.74	1.04	1.07	1.01	1.04	0.34	0.1	0.75	FALSE
Sp110	49.51	47.75	49.77	49.01	1.05	1.01	1.06	1.04	0.44	0.86	0.13	FALSE
Zfp592	51.08	50.96	50.33	50.79	1.02	1.05	1.05	1.04	0.53	0.25	0.23	FALSE
Zscan29	49.24	49.89	48.13	49.08	1.04	1.06	1.03	1.04	0.5	0.37	0.51	FALSE
Hes5	52.24	51.6	48.8	50.88	1.05	1.06	1.02	1.04	0.22	0.14	0.65	FALSE
Tal2	53.85	49.67	49.3	50.94	1.08	1.02	1.03	1.04	0.04	0.63	0.49	FALSE
Obox6	51.44	50.29	51.14	50.96	1.03	1.03	1.07	1.04	0.42	0.43	0.11	FALSE
Snai3	50.71	52.03	50.16	50.97	1.02	1.07	1.05	1.04	0.67	0.09	0.26	FALSE
Zfpl1	49.86	48.01	49.78	49.22	1.05	1.02	1.06	1.04	0.37	0.79	0.13	FALSE
Srebf2	51.35	48.8	50.38	50.18	1.03	1	1.05	1.03	0.44	0.98	0.22	FALSE
Zfp57	52.1	49.11	50.28	50.5	1.04	1.01	1.05	1.03	0.25	0.85	0.24	FALSE
Arntl	52.08	48.8	48.32	49.73	1.04	1	1.01	1.02	0.25	0.98	0.83	FALSE
Zfp3	47.36	48.08	47.92	47.79	1	1.02	1.02	1.01	0.98	0.77	0.58	FALSE
Drap1	49.66	53.34	53.88	52.29	-1	1.09	1.13	0.41	0.91	0.02	0	FALSE
Elf5	49.32	51.96	52.81	51.36	-1.01	1.07	1.1	0.39	0.78	0.1	0.02	FALSE
Tcfec	52.52	48.19	52.56	51.09	1.05	-1.01	1.1	0.38	0.17	0.77	0.02	FALSE
Zfp358	48.57	46.93	50.66	48.72	1.03	-1.01	1.08	0.37	0.66	0.92	0.05	FALSE
Nfyb	50.99	48.16	50.5	49.88	1.02	-1.01	1.05	0.36	0.56	0.76	0.2	FALSE
Zfp365	46.16	49.7	48.7	48.18	-1.02	1.05	1.04	0.36	0.69	0.4	0.34	FALSE
Zfp169	48.43	45.74	50.59	48.26	1.02	-1.03	1.08	0.36	0.69	0.62	0.05	FALSE
Smad5	49.68	49.48	51.35	50.17	-1	1.02	1.07	0.36	0.92	0.71	0.09	FALSE
Pou6f2	51.25	48.39	50.93	50.19	1.03	-1.01	1.06	0.36	0.48	0.85	0.14	FALSE
Dmbx1	46.74	49.04	49.54	48.44	-1.01	1.04	1.06	0.36	0.84	0.54	0.17	FALSE
Nkx2-6	49.76	50.84	50.24	50.28	-1	1.04	1.05	0.36	0.95	0.28	0.25	FALSE
Zdhhc17	50.75	46.46	48.48	48.56	1.07	-1.02	1.03	0.36	0.23	0.8	0.4	FALSE
Pbx2	50.33	48.42	52.31	50.35	1.01	-1.01	1.09	0.36	0.81	0.86	0.03	FALSE
Zfp369	47.16	47.65	48.52	47.78	-1	1.01	1.04	0.35	0.96	0.88	0.39	FALSE
Stat5a	48.11	46.1	49.22	47.81	1.02	-1.02	1.05	0.35	0.78	0.71	0.22	FALSE
Ahrr	51.07	47.04	50.77	49.63	1.02	-1.04	1.06	0.35	0.54	0.38	0.16	FALSE
Dlx1	47.18	48.73	47.75	47.89	-1	1.03	1.02	0.35	0.97	0.61	0.64	FALSE
Zfp426	51.26	50.54	47.65	49.82	1.03	1.04	-1	0.35	0.47	0.36	0.91	FALSE
Zdhhc16	51.32	47.06	48.5	48.96	1.03	-1.04	1.01	0.34	0.45	0.39	0.76	FALSE
Zfp160	49.64	49.01	48.17	48.94	-1	1.01	1.01	0.34	0.91	0.89	0.89	FALSE
Klf1	50.2	46.88	49.83	48.97	1.01	-1.04	1.04	0.34	0.87	0.34	0.34	FALSE
Myst2	47.49	49.6	44.84	47.31	1	1.05	-1.04	0.34	0.95	0.42	0.31	FALSE
Osr1	48.86	45.98	47.22	47.35	1.03	-1.03	1.01	0.34	0.59	0.68	0.85	FALSE
Bbx	50.92	50.06	46.34	49.11	1.02	1.03	-1.03	0.34	0.59	0.5	0.45	FALSE
Adnp2	50.21	47.99	44.2	47.47	1.06	1.02	-1.06	0.34	0.31	0.79	0.18	FALSE
Tbx20	46.18	50.53	50.88	49.2	-1.08	1.04	1.06	0.34	0.06	0.36	0.14	FALSE
Etv1	48.76	50.04	49.17	49.32	-1.02	1.03	1.03	0.34	0.57	0.51	0.53	FALSE
Spz1	51	46.49	47.93	48.47	1.02	-1.05	1	0.33	0.56	0.25	0.98	FALSE
Vsx2	47.84	47.98	44.53	46.78	1.01	1.02	-1.05	0.33	0.85	0.8	0.24	FALSE
Twist2	47.51	49.28	48.68	48.49	-1.05	1.01	1.02	0.33	0.22	0.79	0.69	FALSE
Prr3	48.36	48.58	43.87	46.94	1.02	1.03	-1.07	0.33	0.71	0.64	0.13	FALSE
Hmg20a	50.48	49.78	45.67	48.65	1.01	1.02	-1.05	0.33	0.75	0.6	0.28	FALSE
Mbnl1	43.91	49.76	47.41	47.03	-1.08	1.05	1.01	0.33	0.24	0.39	0.77	FALSE
Zfp27	48	45.19	48.29	47.16	1.01	-1.04	1.03	0.33	0.81	0.5	0.46	FALSE
Irf4	47.11	49.67	48.1	48.3	-1.06	1.02	1	0.32	0.15	0.63	0.91	FALSE
Zfp446	44.6	48.36	46.91	46.62	-1.06	1.02	1	0.32	0.35	0.7	0.97	FALSE
Msc	47.63	47.79	44.53	46.65	1.01	1.01	-1.05	0.32	0.91	0.85	0.24	FALSE
Zdhhc25	48.04	49.05	47.89	48.33	-1.04	1.01	1	0.32	0.35	0.88	0.99	FALSE
Id2	46.5	49.01	49.58	48.36	-1.07	1.01	1.04	0.32	0.08	0.89	0.4	FALSE
Prox2	46.87	49.15	49.12	48.38	-1.06	1.01	1.03	0.32	0.12	0.84	0.54	FALSE
Id3	45.77	49.07	49.14	47.99	-1.09	1.01	1.03	0.31	0.03	0.87	0.54	FALSE
Controls LD_avg: 47.91
Controls LD_std: 2.43
