# Supplementary material for: Identification of the transcription factor ZEB1 as a central component of the adipogenic gene regulatory network
Source: eLife journal article supplement (doi:10.7554/elife.03346), 2014-08-26
Supplement: supp [file elife_poa_e03346_Supplementary_file_3.xlsx]

## Sheet: Table 3 - GeneGOPathways RNASeq
DOWN in ZEB1 KD at Day 0	#	Maps	pValue	FDR
	1	Development_Regulation of epithelial-to-mesenchymal transition (EMT)	5.125e-11	3.182e-08
	2	Development_TGF-beta-dependent induction of EMT via SMADs	2.032e-10	6.31e-08
	3	Development_Thromboxane A2 pathway signaling	3.222e-08	6.67e-06
	4	Membrane-bound ESR1: interaction with G-proteins signaling	1.247e-07	1.936e-05
	5	Development_Ligand-independent activation of ESR1 and ESR2	7.215e-07	8.961e-05
	6	Development_Ligand-dependent activation of the ESR1/AP-1 pathway	1.273e-06	0.0001292
	7	Cardiac Hypertrophy_NF-AT signaling in Cardiac Hypertrophy	1.456e-06	0.0001292
	8	Protein folding and maturation_Angiotensin system maturation \ Human version	3.302e-06	0.0002556
	9	Cell adhesion_ECM remodeling	3.833e-06	0.0002556
	10	Development_WNT signaling pathway. Part 2	4.747e-06	0.0002556
	11	Transcription_Androgen Receptor nuclear signaling	5.351e-06	0.0002556
	12	Development_Membrane-bound ESR1: interaction with growth factors signaling	5.351e-06	0.0002556
	13	Development_Thrombopoietin-regulated cell processes	5.351e-06	0.0002556
	14	Protein folding and maturation_Angiotensin system maturation \ Rodent version	1.048e-05	0.0004648
	15	Cytoskeleton remodeling_Thyroliberin in cytoskeleton remodeling	1.489e-05	0.0006163
	16	Development_Thyroliberin signaling	1.844e-05	0.0006763
	17	Transport_ACM3 in salivary glands	1.851e-05	0.0006763
	18	Development_Notch Signaling Pathway	2.312e-05	0.000772
	19	Immune response_Classical complement pathway	2.362e-05	0.000772
	20	Development_Gastrin in cell growth and proliferation	2.614e-05	0.0008115
	21	Muscle contraction_GPCRs in the regulation of smooth muscle tone	2.902e-05	0.0008581
	22	Transport_Macropinocytosis regulation by growth factors	3.093e-05	0.0008731
	23	Immune response_Oncostatin M signaling via MAPK in human cells	4.059e-05	0.001076
	24	Development_G-Proteins mediated regulation MAPK-ERK signaling	4.33e-05	0.001076
	25	Signal transduction_PTEN pathway	4.33e-05	0.001076
	26	Transcription_Sin3 and NuRD in transcription regulation	5.099e-05	0.001213
	27	Development_WNT5A signaling	5.272e-05	0.001213
	28	Immune response_Lectin induced complement pathway	7.689e-05	0.001705
	29	Putative pathways for stimulation of fat cell differentiation by Bisphenol A	8.872e-05	0.0019
	30	Development_GM-CSF signaling	9.213e-05	0.001907
	31	Signal transduction_PKA signaling	0.0001099	0.002034
	32	Some pathways of EMT in cancer cells	0.0001099	0.002034
	33	Development_Angiotensin activation of ERK	0.0001123	0.002034
	34	Signal transduction_Activin A signaling regulation	0.0001123	0.002034
	35	Translation_Insulin regulation of translation	0.0001179	0.002034
	36	Apoptosis and survival_BAD phosphorylation	0.0001179	0.002034
	37	Development_IGF-1 receptor signaling	0.0001304	0.002131
	38	Signal transduction_Activation of PKC via G-Protein coupled receptor	0.0001304	0.002131
	39	Cell cycle_Regulation of G1/S transition (part 2)	0.000149	0.002372
	40	Development_Endothelin-1/EDNRA signaling	0.0001541	0.002392
	41	Development_NOTCH-induced EMT	0.0001708	0.002531
	42	Development_Activation of Erk by ACM1, ACM3 and ACM5	0.0001724	0.002531
	43	Inhibitory action of Lipoxin A4 on PDGF, EGF and LTD4 signaling	0.0001753	0.002531
	44	Cytoskeleton remodeling_TGF, WNT and cytoskeletal remodeling	0.00021	0.002919
	45	PGE2 pathways in cancer	0.0002124	0.002919
	46	Development_Lipoxin inhibitory action on PDGF, EGF and LTD4 signaling	0.0002162	0.002919
	47	Cell adhesion_Chemokines and adhesion	0.0002332	0.002961
	48	Immune response_Oncostatin M signaling via JAK-Stat in human cells	0.0002343	0.002961
	49	Development_Endothelin-1/EDNRA transactivation of EGFR	0.0002465	0.002961
	50	Development_Mu-type opioid receptor regulation of proliferation	0.000247	0.002961
UP in ZEB1 KD at Day 0	#	Maps	pValue	FDR
	1	Cell cycle_The metaphase checkpoint	4.052e-16	2.561e-13
	2	Cell cycle_Role of APC in cell cycle regulation	6.715e-15	2.122e-12
	3	Cell cycle_Spindle assembly and chromosome separation	2.69e-13	5.666e-11
	4	Cell cycle_Start of DNA replication in early S phase	2.235e-12	2.825e-10
	5	DNA damage_ATM/ATR regulation of G1/S checkpoint	2.235e-12	2.825e-10
	6	Cell cycle_Transition and termination of DNA replication	3.884e-11	4.091e-09
	7	Cell cycle_Cell cycle (generic schema)	1.366e-09	1.079e-07
	8	Cell cycle_Chromosome condensation in prometaphase	1.366e-09	1.079e-07
	9	DNA damage_ATM / ATR regulation of G2 / M checkpoint	2.481e-09	1.742e-07
	10	Cell cycle_Role of Nek in cell cycle regulation	5.403e-09	3.415e-07
	11	Cell cycle_Role of SCF complex in cell cycle regulation	1.339e-08	7.695e-07
	12	Cell cycle_Initiation of mitosis	1.878e-08	9.893e-07
	13	Cell cycle_Nucleocytoplasmic transport of CDK/Cyclins	4.094e-08	1.991e-06
	14	dCTP/dUTP metabolism	6.857e-08	3.095e-06
	15	Cell adhesion_Chemokines and adhesion	1.425e-07	6.005e-06
	16	Immune response_Antigen presentation by MHC class I	9.143e-07	3.611e-05
	17	DNA damage_Role of Brca1 and Brca2 in DNA repair	2.053e-06	7.632e-05
	18	Cytoskeleton remodeling_Keratin filaments	2.266e-06	7.957e-05
	19	Cell adhesion_ECM remodeling	5.72e-06	0.0001903
	20	Transport_RAN regulation pathway	9.927e-06	0.0003137
	21	Cytoskeleton remodeling_TGF, WNT and cytoskeletal remodeling	1.372e-05	0.0003951
	22	Apoptosis and survival_Anti-apoptotic TNFs/NF-kB/Bcl-2 pathway	1.375e-05	0.0003951
	23	dATP/dITP metabolism	1.542e-05	0.0004237
	24	Transcription_Ligand-dependent activation of the ESR1/SP pathway	1.61e-05	0.0004241
	25	Apoptosis and survival_DNA-damage-induced apoptosis	2.485e-05	0.0006281
	26	Cell adhesion_Cell-matrix glycoconjugates	2.749e-05	0.0006682
	27	Cell adhesion_Endothelial cell contacts by junctional mechanisms	3.057e-05	0.0007155
	28	Development_ERBB-family signaling	3.598e-05	0.0008122
	29	Reproduction_Progesterone-mediated oocyte maturation	4.664e-05	0.001017
	30	Cell cycle_Sister chromatid cohesion	5.692e-05	0.001199
	31	Apoptosis and survival_Lymphotoxin-beta receptor signaling	7.629e-05	0.001555
	32	DNA damage_Brca1 as a transcription regulator	0.0001096	0.002165
	33	Cytoskeleton remodeling_Cytoskeleton remodeling	0.0001436	0.002701
	34	Apoptosis and survival_Role of IAP-proteins in apoptosis	0.0001453	0.002701
	35	Cell cycle_Regulation of G1/S transition (part 1)	0.0001548	0.002794
	36	PGE2 pathways in cancer	0.0002426	0.004203
	37	Cell cycle_ESR1 regulation of G1/S transition	0.0002461	0.004203
	38	Immune response_CD40 signaling	0.0003377	0.005617
	39	TTP metabolism	0.0003952	0.006403
	40	Cell cycle_Role of 14-3-3 proteins in cell cycle regulation	0.0004338	0.006686
	41	Immune response_MIF-mediated glucocorticoid regulation	0.0004338	0.006686
	42	Cell adhesion_Gap junctions	0.0006431	0.009677
	43	Neurophysiological process_Receptor-mediated axon growth repulsion	0.0006797	0.009886
	44	Development_WNT signaling pathway. Part 2	0.0006883	0.009886
	45	Proteolysis_Role of Parkin in the Ubiquitin-Proteasomal Pathway	0.0007818	0.01098
	46	Cytoskeleton remodeling_Fibronectin-binding integrins in cell motility	0.0008162	0.01121
	47	Cytoskeleton remodeling_Neurofilaments	0.001023	0.01369
	48	dGTP metabolism	0.001039	0.01369
	49	Immune response_Role of PKR in stress-induced antiviral cell response	0.001302	0.0168
	50	Apoptosis and survival_Role of CDK5 in neuronal death and survival	0.001569	0.01971
DOWN in ZEB1 KD at Day 2	#	Maps	pValue	FDR
	1	Putative pathways for stimulation of fat cell differentiation by Bisphenol A	7.681e-11	4.939e-08
	2	Role of Diethylhexyl Phthalate and Tributyltin in fat cell differentiation	3.933e-09	1.265e-06
	3	Regulation of lipid metabolism_RXR-dependent regulation of lipid metabolism via PPAR, RAR and VDR	7.968e-08	1.708e-05
	4	Development_Regulation of epithelial-to-mesenchymal transition (EMT)	3.028e-07	4.868e-05
	5	Development_TGF-beta-dependent induction of EMT via SMADs	4.872e-07	6.265e-05
	6	Protein folding and maturation_Angiotensin system maturation \ Human version	4.707e-06	0.0004324
	7	Development_Notch Signaling Pathway	4.707e-06	0.0004324
	8	Protein folding and maturation_Angiotensin system maturation \ Rodent version	1.481e-05	0.001191
	9	Regulation of metabolism_Role of Adiponectin in regulation of metabolism	3.171e-05	0.002133
	10	Development_Beta-adrenergic receptors signaling via cAMP	3.317e-05	0.002133
	11	Atherosclerosis_Role of ZNF202 in regulation of expression of genes involved in Atherosclerosis	4.093e-05	0.002393
	12	Development_Ligand-independent activation of ESR1 and ESR2	4.832e-05	0.002589
	13	Influence of low doses of Arsenite on glucose uptake in adipocytes	8.982e-05	0.004443
	14	Apoptosis and survival_Ceramides signaling pathway	0.0001043	0.004791
	15	Signal transduction_PKA signaling	0.0001487	0.0062
	16	Regulation of lipid metabolism_G-alpha(q) regulation of lipid metabolism	0.0001543	0.0062
	17	Development_IGF-1 receptor signaling	0.0001762	0.006333
	18	Muscle contraction_GPCRs in the regulation of smooth muscle tone	0.0001773	0.006333
	19	Development_NOTCH-induced EMT	0.0002088	0.007065
	20	Regulation of metabolism_Bile acids regulation of glucose and lipid metabolism via FXR	0.0003395	0.01091
	21	Leucine, isoleucine and valine metabolism.p.2	0.000371	0.01136
	22	Regulation of lipid metabolism_Regulation of lipid metabolism via LXR, NF-Y and SREBP	0.0004119	0.01204
	23	Leucine, isoleucine and valine metabolism/ Rodent version	0.0004711	0.01317
	24	Immune response_Lectin induced complement pathway	0.00053	0.0142
	25	Development_Inhibition of angiogenesis by PEDF	0.000605	0.01556
	26	Mechanism of Pioglitazone/ Metformin and Rosiglitazone/ Metformin cooperative action in Diabetes mellitus, Type 2	0.0007649	0.01892
	27	Immune response_Classical complement pathway	0.0008335	0.0192
	28	Apoptosis and survival_BAD phosphorylation	0.0008373	0.0192
	29	Transcription_PPAR Pathway	0.00088	0.0192
	30	Apoptosis and survival_Regulation of Apoptosis by Mitochondrial Proteins	0.0009031	0.0192
	31	Development_Endothelin-1/EDNRA signaling	0.0009614	0.0192
	32	Development_WNT signaling pathway. Part 2	0.0009614	0.0192
	33	Cytoskeleton remodeling_TGF, WNT and cytoskeletal remodeling	0.0009899	0.0192
	34	Mechanism of Pioglitazone and Rosiglitazon action in Diabetes mellitus, Type 2	0.001082	0.0192
	35	Development_NOTCH1-mediated pathway for NF-KB activity modulation	0.00109	0.0192
	36	Membrane-bound ESR1: interaction with G-proteins signaling	0.001105	0.0192
	37	Development_Role of HDAC and calcium/calmodulin-dependent kinase (CaMK) in control of skeletal myogenesis	0.001105	0.0192
	38	Glycolysis and gluconeogenesis (short map)	0.001275	0.02157
	39	Transcription_Androgen Receptor nuclear signaling	0.001345	0.02217
	40	Development_PIP3 signaling in cardiac myocytes	0.001801	0.0266
	41	Regulation of lipid metabolism_Insulin signaling:generic cascades	0.001801	0.0266
	42	Development_TGF-beta-dependent induction of EMT via MAPK	0.001801	0.0266
	43	Regulation of lipid metabolism_Regulation of fatty acid synthase activity in hepatocytes	0.001803	0.0266
	44	Development_Beta-adrenergic receptors transactivation of EGFR	0.001838	0.0266
	45	Regulation of CFTR activity (norm and CF)	0.001861	0.0266
	46	Immune response_Oncostatin M signaling via JAK-Stat in human cells	0.002308	0.03227
	47	Development_Thromboxane A2 pathway signaling	0.002372	0.03245
	48	Propionate metabolism p.1	0.002524	0.03312
	49	Immune response_Alternative complement pathway	0.002524	0.03312
	50	Neurophysiological process_Corticoliberin signaling via CRHR1	0.002705	0.03479
UP in ZEB1 KD at Day 2	#	Maps	pValue	FDR
	1	Neurophysiological process_Receptor-mediated axon growth repulsion	7.559e-11	4.792e-08
	2	Immune response_IFN alpha/beta signaling pathway	5.215e-09	1.653e-06
	3	Cell adhesion_Chemokines and adhesion	4.672e-08	9.873e-06
	4	Development_Angiotensin signaling via STATs	2.717e-07	4.306e-05
	5	Immune response_Antiviral actions of Interferons	4.645e-07	5.89e-05
	6	DNA damage_ATM / ATR regulation of G2 / M checkpoint	2.099e-06	0.0001901
	7	Cell adhesion_Endothelial cell contacts by junctional mechanisms	2.099e-06	0.0001901
	8	Cytoskeleton remodeling_TGF, WNT and cytoskeletal remodeling	5.363e-06	0.000425
	9	G-protein signaling_Regulation of RAC1 activity	8.709e-06	0.0006135
	10	Cytoskeleton remodeling_Fibronectin-binding integrins in cell motility	1.311e-05	0.0008313
	11	Cell adhesion_ECM remodeling	1.541e-05	0.0008883
	12	Cell adhesion_Cadherin-mediated cell adhesion	1.878e-05	0.0009208
	13	Cytoskeleton remodeling_Cytoskeleton remodeling	1.888e-05	0.0009208
	14	Immune response _CCR3 signaling in eosinophils	2.09e-05	0.0009465
	15	Immune response _IFN gamma signaling pathway	2.391e-05	0.001011
	16	PGE2 pathways in cancer	2.952e-05	0.00117
	17	Chemotaxis_Leukocyte chemotaxis	6.038e-05	0.002252
	18	Development_Osteopontin signaling in osteoclasts	6.834e-05	0.00228
	19	Cell adhesion_Gap junctions	6.834e-05	0.00228
	20	Cell adhesion_Histamine H1 receptor signaling in the interruption of cell barrier integrity	8.71e-05	0.002761
	21	Transcription_Role of AP-1 in regulation of cellular metabolism	9.321e-05	0.002814
	22	G-protein signaling_Regulation of CDC42 activity	0.0001551	0.00447
	23	Signal transduction_Erk Interactions: Inhibition of Erk	0.0001992	0.005263
	24	Apoptosis and survival_Role of CDK5 in neuronal death and survival	0.0001992	0.005263
	25	Immune response_Antigen presentation by MHC class I	0.0002542	0.006446
	26	Cell adhesion_Role of tetraspanins in the integrin-mediated cell adhesion	0.0003981	0.009708
	27	Cell adhesion_Ephrin signaling	0.0004202	0.009867
	28	G-protein signaling_Rap2B regulation pathway	0.0004859	0.01037
	29	Immune response_Role of DAP12 receptors in NK cells	0.0004873	0.01037
	30	Cell adhesion_Cell-matrix glycoconjugates	0.0004927	0.01037
	31	Immune response_MIF-induced cell adhesion, migration and angiogenesis	0.0005069	0.01037
	32	Cell adhesion_Endothelial cell contacts by non-junctional mechanisms	0.000542	0.01074
	33	Development_Beta-adrenergic receptors regulation of ERK	0.0006079	0.01168
	34	Chemotaxis_CCL2-induced chemotaxis	0.0006752	0.01243
	35	DNA damage_ATM/ATR regulation of G1/S checkpoint	0.0006862	0.01243
	36	Development_Prolactin receptor signaling	0.0009198	0.01579
	37	Development_S1P2 and S1P3 receptors in cell proliferation and differentiation	0.0009217	0.01579
	38	Cell adhesion_Alpha-4 integrins in cell migration and adhesion	0.001058	0.01766
	39	Development_S1P3 receptor signaling pathway	0.001282	0.02085
	40	Development_Activation of Erk by ACM1, ACM3 and ACM5	0.001523	0.02414
	41	Development_Hedgehog and PTH signaling pathways in bone and cartilage development	0.001576	0.02437
	42	Role of alpha-6/beta-4 integrins in carcinoma progression	0.001799	0.02594
	43	G-protein signaling_Regulation of cAMP levels by ACM	0.001799	0.02594
	44	Apoptosis and survival_DNA-damage-induced apoptosis	0.0018	0.02594
	45	G-protein signaling_H-RAS regulation pathway	0.001901	0.02679
	46	Development_Thrombopoetin signaling via JAK-STAT pathway	0.002	0.02698
	47	Cytoskeleton remodeling_CDC42 in cellular processes	0.002	0.02698
	48	Development_Endothelin-1/EDNRA transactivation of EGFR	0.002113	0.02734
	49	Immune response_MIF - the neuroendocrine-macrophage connector	0.002113	0.02734
	50	Immune response_Role of integrins in NK cells cytotoxicity	0.002277	0.0284
