# Supplementary material for: Identification of the transcription factor ZEB1 as a central component of the adipogenic gene regulatory network
Source: eLife journal article supplement (doi:10.7554/elife.03346), 2014-08-26
Supplement: supp [file elife_poa_e03346_Supplementary_file_4.xlsx]

## Sheet: Table 4 - ChIPSeq HomerGeneOnto
Name	#features[ref=27854]	Coverage(bp)[ref=11012747]	AvgFeatureSize[ref=395]	Overlap(#peaks)	Overlap(bp)	Expected Overlap(bp, gsize=2.00e+09)	Log Ratio Enrichment	Log P-value(+ underrepresented)	P-value
cpgIsland	16023	10495450	655	9180	3264579	57791	4.03	-27954.2	0
promoters	31193	26836917	860	9066	3113665	147774	3.05	-18092.4	0
utr5	40221	4031013	100	7100	989591	22196	3.8	-7502.22	0
exons	344272	63981717	185	8721	1825161	352307	1.64	-4190.84	0
protein-coding	334251	60331751	180	8397	1709852	332209	1.64	-3884.93	0
coding	276210	38108709	137	5606	806991	209840	1.35	-1299.29	0
miscRNA	7721	3133732	405	449	122766	17255	1.96	-350.62	5.33e-153
tts	31193	26053006	835	790	259957	143457	0.59	-101.86	5.78e-45
miRNA	919	59626	64	34	2848	328	2.16	-10.69	2.27e-05
pseudo	1208	607229	502	38	5960	3343	0.58	-3.64	0.0262
snoRNA	150	10941	72	6	598	60	2.3	-1.98	0.139
snRNA	4	269	67	1	150	1	5.01	0	1
unknown	8	1304	163	0	0	7	-1.95	0.02	0.984
rRNA	11	7562	687	0	0	41	-3.71	0.1	0.9
utr3	27841	22586267	811	346	77226	124368	-0.48	29.42	1.67e-13
introns	260334	922658222	3544	14469	4230913	5080500	-0.18	343.81	4.82e-150
centromeres	20	57800000	2890000	0	0	318268	-12.67	819.9	0
gaps	686	78088274	113831	1	33	429983	-9.47	1113.5	0
