# Supplementary material for: Identification of the transcription factor ZEB1 as a central component of the adipogenic gene regulatory network
Source: eLife journal article supplement (doi:10.7554/elife.03346), 2014-08-26
Supplement: supp [file elife_poa_e03346_Supplementary_file_5.xlsx]

## Sheet: Table 5 - MotifDiscovery Homer
Motif Name (Motifs highlighted in manuscript in red)	Consensus	P-value	Log P-value	q-value (Benjamini)	# of Target Sequences with Motif(of 27850)	% of Target Sequences with Motif	# of Background Sequences with Motif(of 27348)	% of Background Sequences with Motif
AP-1(bZIP)/ThioMac-PU.1-ChIP-Seq(GSE21512)/Homer	VTGACTCATC	1e-645	-1486	0	2487	0.0893	667.3	0.0244
Jun-AP1(bZIP)/K562-cJun-ChIP-Seq/Homer	GATGASTCATCN	1e-598	-1378	0	1358	0.0488	213.5	0.0078
Bach2(bZIP)/OCILy7-Bach2-ChIP-Seq(GSE44420)/Homer	TGCTGAGTCA	1e-253	-584.2	0	906	0.0325	224.6	0.0082
NF1(CTF)/LNCAP-NF1-ChIP-Seq/Homer	CYTGGCABNSTGCCAR	1e-244	-563.2	0	1503	0.054	549.6	0.0201
NF1-halfsite(CTF)/LNCaP-NF1-ChIP-Seq/Homer	YTGCCAAG	1e-238	-549.5	0	4676	0.1679	2816.5	0.103
Tlx?/NPC-H3K4me1-ChIP-Seq/Homer	CTGGCAGSCTGCCA	1e-136	-313.5	0	1375	0.0494	643.2	0.0235
Hoxc9/Ainv15-Hoxc9-ChIP-Seq/Homer	GGCCATAAATCA	1e-134	-309.6	0	872	0.0313	327.6	0.012
TEAD4(TEA)/Tropoblast-Tead4-ChIP-Seq(GSE37350)/Homer	CCWGGAATGY	1e-133	-307.5	0	1886	0.0677	1006.2	0.0368
TEAD(TEA)/Fibroblast-PU.1-ChIP-Seq/Homer	YCWGGAATGY	1e-131	-303.3	0	1378	0.0495	654.2	0.0239
NF-E2(bZIP)/K562-NFE2-ChIP-Seq/Homer	GATGACTCAGCA	1e-127	-293.8	0	309	0.0111	52.8	0.0019
RUNX(Runt)/HPC7-Runx1-ChIP-Seq/Homer	SAAACCACAG	1e-120	-277	0	1754	0.063	945.6	0.0346
RUNX-AML(Runt)/CD4+-PolII-ChIP-Seq/Homer	GCTGTGGTTW	1e-116	-268.2	0	1599	0.0574	843.7	0.0308
Pdx1(Homeobox)/Islet-Pdx1-ChIP-Seq/Homer	YCATYAATCA	1e-109	-253	0	1423	0.0511	734.2	0.0268
Bach1(bZIP)/K562-Bach1-ChIP-Seq(GSE31477)/Homer	AWWNTGCTGAGTCAT	1e-105	-243.8	0	253	0.0091	42.8	0.0016
Nrf2(bZIP)/Lymphoblast-Nrf2-ChIP-Seq(GSE37589)/Homer	HTGCTGAGTCAT	1e-100	-232.2	0	260	0.0093	47.3	0.0017
LIN-39(Homeobox)/cElegans.L3-LIN39-ChIP-Seq(modEncode)/Homer	ATGATTRATG	1e-95	-220.7	0	1390	0.0499	746.9	0.0273
RUNX1(Runt)/Jurkat-RUNX1-ChIP-Seq/Homer	AAACCACARM	1e-94	-216.7	0	2157	0.0774	1331.7	0.0487
RUNX2(Runt)/PCa-RUNX2-ChIP-Seq(GSE33889)/Homer	NWAACCACADNN	1e-92	-212.6	0	1831	0.0657	1085.6	0.0397
Elk4(ETS)/Hela-Elk4-ChIP-Seq(GSE31477)/Homer	NRYTTCCGGY	1e-88	-204.5	0	1774	0.0637	1053	0.0385
Fli1(ETS)/CD8-FLI-ChIP-Seq(GSE20898)/Homer	NRYTTCCGGH	1e-85	-195.8	0	2726	0.0979	1824.2	0.0667
HOXA9/HSC-Hoxa9-ChIP-Seq(GSE33509)/Homer	GGCCATAAATCA	1e-83	-193.1	0	991	0.0356	493.6	0.018
Elk1(ETS)/Hela-Elk1-ChIP-Seq(GSE31477)/Homer	HACTTCCGGY	1e-75	-173.7	0	1755	0.063	1085.6	0.0397
ELF1(ETS)/Jurkat-ELF1-ChIP-Seq/Homer	AVCCGGAAGT	1e-74	-172.5	0	1629	0.0585	989.3	0.0362
NF1:FOXA1/LNCAP-FOXA1-ChIP-Seq(GSE27824)/Homer	WNTGTTTRYTTTGGCA	1e-70	-161.3	0	159	0.0057	25	0.0009
GABPA(ETS)/Jurkat-GABPa-ChIP-Seq/Homer	RACCGGAAGT	1e-69	-160.1	0	2191	0.0787	1457.3	0.0533
ETS(ETS)/Promoter/Homer	AACCGGAAGT	1e-67	-155.7	0	1117	0.0401	625.7	0.0229
ERG(ETS)/VCaP-ERG-ChIP-Seq/Homer	ACAGGAAGTG	1e-59	-136.6	0	3149	0.1131	2314.1	0.0846
ETV1(ETS)/GIST48-ETV1-ChIP-Seq/Homer	AACCGGAAGT	1e-58	-135.4	0	3038	0.1091	2222.1	0.0812
ETS1(ETS)/Jurkat-ETS1-ChIP-Seq/Homer	ACAGGAAGTG	1e-58	-133.9	0	2315	0.0831	1614.7	0.059
Atf4(bZIP)/MEF-Atf4-ChIP-Seq(GSE35681)/Homer	ATGATGCAAT	1e-55	-127	0	362	0.013	137.6	0.005
MafK(bZIP)/C2C12-MafK-ChIP-Seq(GSE36030)/Homer	GCTGASTCAGCA	1e-53	-122.6	0	658	0.0236	333.2	0.0122
EWS:FLI1-fusion(ETS)/SK_N_MC-EWS:FLI1-ChIP-Seq/Homer	VACAGGAAAT	1e-50	-116	0	1331	0.0478	848	0.031
CTCF(Zf)/CD4+-CTCF-ChIP-Seq/Homer	AYAGTGCCMYCTRGTGGCCA	1e-45	-104.2	0	447	0.016	207	0.0076
Atoh1(bHLH)/Cerebellum-Atoh1-ChIP-Seq/Homer	VNRVCAGCTGGY	1e-41	-96.59	0	2419	0.0868	1796.7	0.0657
AP2gamma(AP2)/MCF7-TFAP2c-ChIP-Seq/Homer	HHTGSCCTSAGGSCA	1e-41	-95.11	0	1880	0.0675	1341.6	0.049
Hoxb4/ES-Hoxb4-ChIP-Seq(GSE34014)/Homer	TGATTRATGGCY	1e-39	-90	0	377	0.0135	173.9	0.0064
HOXA2(Homeobox)/mES-Hoxa2-ChIP-Seq/Homer	GYCATCMATCAT	1e-37	-87.26	0	241	0.0087	90.5	0.0033
Chop(bZIP)/MEF-Chop-ChIP-Seq(GSE35681)/Homer	ATTGCATCATCY	1e-37	-85.82	0	248	0.0089	95.3	0.0035
CEBP:AP1(bZIP)/ThioMac-CEBPb-ChIP-Seq(GSE21512)/Homer	DRTGTTGCAA	1e-36	-84.41	0	1014	0.0364	653.1	0.0239
Stat3(Stat)/mES-Stat3-ChIP-Seq/Homer	CTTCCGGGAA	1e-34	-78.56	0	954	0.0343	616.5	0.0225
NeuroD1(bHLH)/Islet-NeuroD1-ChIP-Seq(GSE30298)/Homer	GCCATCTGTT	1e-33	-77.28	0	1703	0.0611	1237.5	0.0452
BORIS(Zf)/K562-CTCFL-ChIP-Seq/Homer	CNNBRGCGCCCCCTGSTGGC	1e-32	-75.95	0	597	0.0214	345	0.0126
CEBP(bZIP)/CEBPb-ChIP-Seq(GSE21512)/Homer	ATTGCGCAAC	1e-32	-73.97	0	798	0.0286	501	0.0183
SPDEF(ETS)/VCaP-SPDEF-ChIP-Seq/Homer	ASWTCCTGBT	1e-31	-71.56	0	1984	0.0712	1494.6	0.0546
AP-2alpha(AP2)/Hela-AP2alpha-ChIP-Seq/Homer	ATGCCCTGAGGC	1e-30	-69.46	0	1869	0.0671	1401.6	0.0512
EWS:ERG-fusion(ETS)/CADO_ES1-EWS:ERG-ChIP-Seq/Homer	ATTTCCTGTN	1e-30	-69.43	0	1079	0.0387	735.8	0.0269
Stat3+il23(Stat)/CD4-Stat3-ChIP-Seq/Homer	SVYTTCCNGGAARB	1e-29	-67.87	0	1172	0.0421	815.5	0.0298
STAT4(Stat)/CD4-Stat4-ChIP-Seq/Homer	NYTTCCWGGAAR	1e-28	-66.12	0	1268	0.0455	899.3	0.0329
Ap4(HLH)/AML-Tfap4-ChIP-Seq(GSE45738)/Homer	NAHCAGCTGD	1e-27	-64.43	0	2651	0.0952	2104.1	0.0769
MafA(bZIP)/Islet-MafA-ChIP-Seq(GSE30298)/Homer	TGCTGACTCA	1e-26	-60.33	0	1698	0.061	1281.1	0.0468
ELF5(ETS)/T47D-ELF5-ChIP-Seq(GSE30407)/Homer	ACVAGGAAGT	1e-25	-59.18	0	1259	0.0452	909.6	0.0333
STAT1(Stat)/HelaS3-STAT1-ChIP-Seq/Homer	NATTTCCNGGAAAT	1e-25	-58.08	0	407	0.0146	227.6	0.0083
AARE(HLH)/mES-cMyc-ChIP-Seq/Homer	GATTGCATCA	1e-23	-53.53	0	178	0.0064	74.3	0.0027
Olig2(bHLH)/Neuron-Olig2-ChIP-Seq(GSE30882)/Homer	RCCATMTGTT	1e-23	-53.18	0	3474	0.1247	2895.8	0.1059
caudal(Homeobox)/Drosophila-Embryos-ChIP-Chip(modEncode)/Homer	GGYCATAAAW	1e-22	-52.83	0	714	0.0256	473.7	0.0173
Smad3(MAD)/NPC-Smad3-ChIP-Seq(GSE36673)/Homer	TWGTCTGV	1e-22	-51.54	0	5275	0.1894	4569.9	0.167
Tcf12(HLH)/GM12878-Tcf12-ChIP-Seq/Homer	VCAGCTGYTG	1e-21	-48.93	0	2197	0.0789	1760.7	0.0644
EBF1(EBF)/Near-E2A-ChIP-Seq/Homer	GTCCCCWGGGGA	1e-21	-48.69	0	1997	0.0717	1583.6	0.0579
Tal1	CATCTG	1e-19	-44.09	0	2448	0.0879	2007	0.0734
STAT5(Stat)/mCD4+-Stat5a|b-ChIP-Seq/Homer	RTTTCTNAGAAA	1e-18	-43.14	0	484	0.0174	308.2	0.0113
Foxa2(Forkhead)/Liver-Foxa2-ChIP-Seq/Homer	CYTGTTTACWYW	1e-16	-38.15	0	873	0.0313	639.5	0.0234
Ets1-distal(ETS)/CD4+-PolII-ChIP-Seq/Homer	MACAGGAAGT	1e-16	-37.38	0	566	0.0203	385.5	0.0141
Six1(Homeobox)/Myoblast-Six1-ChIP-Chip(GSE20150)/Homer	GKVTCADRTTWC	1e-15	-35.31	0	362	0.013	226.8	0.0083
MyoG(HLH)/C2C12-MyoG-ChIP-Seq(GSE36024)/Homer	AACAGCTG	1e-15	-35.17	0	2359	0.0847	1968.9	0.072
Tbx20(T-box)/Heart-Tbx20-ChIP-Seq(GSE29636)/Homer	GGTGYTGACAGS	1e-15	-34.84	0	488	0.0175	328	0.012
SUT1?/SacCer-Promoters/Homer	CCCCGCGC	1e-14	-34.33	0	15706	0.5639	14779.3	0.5402
ETS:RUNX/Jurkat-RUNX1-ChIP-Seq/Homer	RCAGGATGTGGT	1e-14	-34.05	0	215	0.0077	117.5	0.0043
SCL/HPC7-Scl-ChIP-Seq/Homer	AVCAGCTG	1e-14	-33.74	0	9389	0.3371	8620.4	0.3151
YY1(Zf)/Promoter/Homer	CAAGATGGCGGC	1e-14	-32.3	0	254	0.0091	148.9	0.0054
EBF(EBF)/proBcell-EBF-ChIP-Seq/Homer	DGTCCCYRGGGA	1e-13	-31.55	0	414	0.0149	274.1	0.01
E2F4(E2F)/K562-E2F4-ChIP-Seq(GSE31477)/Homer	GGCGGGAAAH	1e-13	-31.09	0	1119	0.0402	874.1	0.032
Myf5(bHLH)/GM-Myf5-ChIP-Seq(GSE24852)/Homer	BAACAGCTGT	1e-12	-28.91	0	1521	0.0546	1240.9	0.0454
ZBTB33/GM12878-ZBTB33-ChIP-Seq/Homer	GGVTCTCGCGAGAAC	1e-11	-27.5	0	137	0.0049	69.6	0.0025
PU.1(ETS)/ThioMac-PU.1-ChIP-Seq(GSE21512)/Homer	AGAGGAAGTG	1e-11	-26.2	0	789	0.0283	603.5	0.0221
SeqBias: CG bias	SSSSSSSSSS	1e-11	-25.88	0	21462	0.7705	20603	0.7531
Foxo1(Forkhead)/RAW-Foxo1-ChIP-Seq/Homer	CTGTTTAC	1e-11	-25.34	0	2591	0.093	2237.8	0.0818
Atf1(bZIP)/K562-ATF1-ChIP-Seq(GSE31477)/Homer	GATGACGTCA	1e-10	-24.28	0	1008	0.0362	802.5	0.0293
E-box(HLH)/Promoter/Homer	SSGGTCACGTGA	1e-09	-22.61	0	193	0.0069	116.6	0.0043
Gata2(Zf)/K562-GATA2-ChIP-Seq/Homer	BBCTTATCTS	1e-09	-21.77	0	607	0.0218	460.6	0.0168
Gata1(Zf)/K562-GATA1-ChIP-Seq/Homer	SAGATAAGRV	1e-09	-21.31	0	560	0.0201	421.8	0.0154
FOXA1(Forkhead)/LNCAP-FOXA1-ChIP-Seq(GSE27824)/Homer	WAAGTAAACA	1e-09	-21.3	0	1049	0.0377	851.8	0.0311
ATF3(bZIP)/K562-ATF3-ChIP-Seq/Homer	SGGTCACGTGAC	1e-09	-20.76	0	386	0.0139	275.3	0.0101
NFkB-p65-Rel(RHD)/LPS-exp(GSE23622)/Homer	GGAAATTCCC	1e-08	-19.79	0	91	0.0033	45.8	0.0017
EKLF(Zf)/Erythrocyte-Klf1-ChIP-Seq(GSE20478)/Homer	NWGGGTGTGGCY	1e-08	-19.68	0	429	0.0154	314.1	0.0115
Cdx2(Homeobox)/mES-Cdx2-ChIP-Seq/Homer	GYMATAAAAH	1e-08	-18.53	0	515	0.0185	391.4	0.0143
E-box/Drosophila-Promoters/Homer	AACAGCTGTTHN	1e-07	-17.83	0	431	0.0155	321	0.0117
GATA-IR4(Zf)/iTreg-Gata3-ChIP-Seq(GSE20898)/Homer	NAGATWNBNATCTNN	1e-07	-17.55	0	92	0.0033	48.2	0.0018
Gata4(Zf)/Heart-Gata4-ChIP-Seq(GSE35151)/Homer	NBWGATAAGR	1e-07	-17.46	0	879	0.0316	716.5	0.0262
FOXA1(Forkhead)/MCF7-FOXA1-ChIP-Seq/Homer	WAAGTAAACA	1e-07	-16.61	0	773	0.0278	625.3	0.0229
Usf2(HLH)/C2C12-Usf2-ChIP-Seq(GSE36030)/Homer	GTCACGTGGT	1e-07	-16.44	0	562	0.0202	439	0.016
Sp1(Zf)/Promoter/Homer	GGCCCCGCCCCC	1e-06	-15.66	0	934	0.0335	774.4	0.0283
Bcl6(Zf)/Liver-Bcl6-ChIP-Seq(GSE31578)/Homer	NNNCTTTCCAGGAAA	1e-06	-15.61	0	1831	0.0657	1598.5	0.0584
NFAT:AP1/Jurkat-NFATC1-ChIP-Seq/Homer	SARTGGAAAAWRTGAGTCAB	1e-06	-15.32	0	176	0.0063	115.1	0.0042
GFX(?)/Promoter/Homer	ATTCTCGCGAGA	1e-06	-15.28	0	70	0.0025	35.7	0.0013
Fox:Ebox(Forkhead:HLH)/Panc1-Foxa2-ChIP-Seq(GSE47459)/Homer	NNNVCTGWGYAAACASN	1e-06	-15.05	0	1276	0.0458	1089.9	0.0398
E2F6(E2F)/Hela-E2F6-ChIP-Seq(GSE31477)/Homer	GGCGGGAARN	1e-06	-14.33	0	1089	0.0391	922.7	0.0337
GATA-IR3(Zf)/iTreg-Gata3-ChIP-Seq(GSE20898)/Homer	NNNNNBAGATAWYATCTVHN	1e-06	-13.99	0	126	0.0045	78	0.0029
MyoD(HLH)/Myotube-MyoD-ChIP-Seq/Homer	RRCAGCTGYTSY	1e-05	-13.73	0	1712	0.0615	1501.9	0.0549
Egr2/Thymocytes-Egr2-ChIP-Seq(GSE34254)/Homer	NGCGTGGGCGGR	1e-05	-13.26	0	422	0.0152	328.1	0.012
ETS:E-box/HPC7-Scl-ChIP-Seq/Homer	AGGAARCAGCTG	1e-05	-13.02	0	148	0.0053	97.2	0.0036
FOXP1(Forkhead)/H9-FOXP1-ChIP-Seq(GSE31006)/Homer	NYYTGTTTACHN	1e-05	-12.87	0	417	0.015	325.3	0.0119
Ptf1a(HLH)/Panc1-Ptf1a-ChIP-Seq(GSE47459)/Homer	ACAGCTGTTN	1e-05	-12.66	0	5598	0.201	5205.4	0.1903
HLH-1(bHLH)/cElegans-Embryo-HLH1-ChIP-Seq(modEncode)/Homer	RACAGCTGTTBH	1e-05	-12.24	0	1263	0.0453	1095.9	0.0401
STAT6/Macrophage-Stat6-ChIP-Seq/Homer	TTCCKNAGAA	1e-05	-11.61	0	539	0.0194	438.9	0.016
CRE(bZIP)/Promoter/Homer	CSGTGACGTCAC	0.0001	-10.67	0.0001	484	0.0174	393.5	0.0144
HEB?/mES-Nanog-ChIP-Seq/Homer	CACAGCAGGGGG	0.0001	-10.55	0.0001	1071	0.0385	929	0.034
Unknown3/Arabidopsis-Promoters/Homer	AYTAAACCGG	0.0001	-10.39	0.0001	192	0.0069	139.3	0.0051
Klf4(Zf)/mES-Klf4-ChIP-Seq/Homer	GCCACACCCA	0.0001	-10.33	0.0001	909	0.0326	781.9	0.0286
IRF2(IRF)/Erythroblas-IRF2-ChIP-Seq(GSE36985)/Homer	GAAASYGAAASY	0.0001	-10.3	0.0001	119	0.0043	79.6	0.0029
E2F7(E2F)/Hela-E2F7-ChIP-Seq(GSE32673)/Homer	VDTTTCCCGCCA	0.0001	-10.2	0.0001	279	0.01	214.3	0.0078
c-Jun-CRE(bZIP)/K562-cJun-ChIP-Seq/Homer	ATGACGTCATCY	0.0001	-10.2	0.0001	466	0.0167	379.2	0.0139
ZFX(Zf)/mES-Zfx-ChIP-Seq/Homer	AGGCCTRG	0.0001	-9.388	0.0002	2449	0.0879	2234.3	0.0817
GEI-11(Myb?)/cElegans-L4-GEI11-ChIP-Seq(modEncode)/Homer	CCGACAYYTYACGGG	0.0001	-9.344	0.0002	98	0.0035	64.3	0.0024
IRF4(IRF)/GM12878-IRF4-ChIP-Seq/Homer	ACTGAAACCA	0.001	-9.085	0.0003	467	0.0168	385.4	0.0141
Smad2(MAD)/ES-SMAD2-ChIP-Seq(GSE29422)/Homer	CTGTCTGG	0.001	-8.924	0.0003	2808	0.1008	2581.2	0.0944
Cbf1(bHLH)/Yeast-Cbf1-ChIP-Seq(GSE29506)/Homer	TCACGTGAYH	0.001	-8.648	0.0004	458	0.0164	379.7	0.0139
GATA3(Zf)/iTreg-Gata3-ChIP-Seq(GSE20898)/Homer	AGATAASR	0.001	-8.055	0.0008	1280	0.046	1143.5	0.0418
SeqBias: polyA-repeat	AAAAAAAAAA	0.001	-7.967	0.0008	24388	0.8756	23766	0.8687
E2F1(E2F)/Hela-E2F1-ChIP-Seq/Hoemr	CWGGCGGGAA	0.001	-7.966	0.0008	517	0.0186	436.6	0.016
GATA-DR4(Zf)/iTreg-Gata3-ChIP-Seq(GSE20898)/Homer	AGATGKDGAGATAAG	0.001	-7.542	0.0013	70	0.0025	45.6	0.0017
Smad4(MAD)/ESC-SMAD4-ChIP-Seq(GSE29422)/Homer	VBSYGTCTGG	0.001	-7.452	0.0014	2945	0.1057	2731.9	0.0999
MafF(bZIP)/HepG2-MafF-ChIP-Seq(GSE31477)/Homer	HWWGTCAGCAWWTTT	0.001	-7.311	0.0016	224	0.008	176.3	0.0064
NFAT(RHD)/Jurkat-NFATC1-ChIP-Seq/Homer	ATTTTCCATT	0.001	-7.305	0.0016	839	0.0301	737.5	0.027
Unknown4/Drosophila-Promoters/Homer	AAAAATACCRMA	0.001	-7.238	0.0017	63	0.0023	40.7	0.0015
GFY(?)/Promoter/Homer	ACTACAATTCCC	0.001	-7.148	0.0018	152	0.0055	114.5	0.0042
NFkB-p65(RHD)/GM12787-p65-ChIP-Seq/Homer	WGGGGATTTCCC	0.001	-7.024	0.002	621	0.0223	537.3	0.0196
Mef2a(MADS)/HL1-Mef2a.biotin-ChIP-Seq/Homer/	CYAAAAATAG	0.01	-6.864	0.0024	265	0.0095	214.1	0.0078
Pax8(Paired/Homeobox)/Rat-Pax8-ChIP-Seq/Homer	GTCATGCHTGRCTGS	0.01	-6.51	0.0033	627	0.0225	546	0.02
BMYB(HTH)/Hela-BMYB-ChIPSeq(GSE27030)/Homer	NHAACBGYYV	0.01	-6.496	0.0033	1976	0.0709	1818.7	0.0665
Unknown5/Drosophila-Promoters/Homer	GCTGATAASV	0.01	-6.341	0.0039	589	0.0211	512.6	0.0187
ISRE(IRF)/ThioMac-LPS-exp(GSE23622)/HOMER	AGTTTCASTTTC	0.01	-6.239	0.0043	67	0.0024	45.7	0.0017
JunD(bZIP)/K562-JunD-ChIP-Seq/Homer	ATGACGTCATCN	0.01	-6.071	0.005	187	0.0067	148.2	0.0054
STAT6(Stat)/CD4-Stat6-ChIP-Seq/Homer	ABTTCYYRRGAA	0.01	-6.046	0.0051	472	0.0169	406.2	0.0148
Tbx5(T-box)/HL1-Tbx5.biotin-ChIP-Seq/Homer	AGGTGTCA	0.01	-6.023	0.0052	5404	0.194	5126.6	0.1874
E2A(HLH)/proBcell-E2A-ChIP-Seq/Homer	DNRCAGCTGY	0.01	-6.022	0.0052	3127	0.1123	2928	0.107
ZNF711(Zf)/SH-SY5Y-ZNF711-ChIP-Seq/Homer	AGGCCTAG	0.01	-5.778	0.0065	3899	0.14	3675.9	0.1344
Rfx1(HTH)/NPC-Rfx1-ChIP-Seq/Homer	KGTTGCCATGGCAA	0.01	-5.392	0.0095	304	0.0109	256.4	0.0094
HRE(HSF)/HepG2-HSF1-ChIP-Seq/Homer	BSTTCTRGAABVTTCYAGAA	0.01	-5.338	0.01	204	0.0073	166.3	0.0061
ABF1/SacCer-Promoters/Homer	CGTRNAAARTGA	0.01	-5.271	0.0106	300	0.0108	253.7	0.0093
FHY3(FAR1)/Arabidopsis-FHY3-ChIP-Seq(GSE30711)/Homer	HHCACGCGCBTN	0.01	-4.82	0.0165	737	0.0265	662.9	0.0242
GATA:SCL/Ter119-SCL-ChIP-Seq/Homer	CRGCTGBNGNSNNSAGATAA	0.01	-4.817	0.0165	109	0.0039	84.8	0.0031
Srebp1a(HLH)/HepG2-Srebp1a-ChIP-Seq/Homer	RTCACSCCAY	0.01	-4.791	0.0167	284	0.0102	241.4	0.0088
HOXD13(Homeobox)/Chicken-Hoxd13-ChIP-Seq(GSE38910)/Homer	NCYAATAAAA	0.01	-4.728	0.0177	668	0.024	598.6	0.0219
Lhx3-like?(Homeobox)/Forebrain-p300-ChIP-Seq/Homer	CTAATTAGCH	0.01	-4.721	0.0177	804	0.0289	726.7	0.0266
Tbox:Smad/ESCd5-Smad2_3-ChIP-Seq(GSE29422)/Homer	AGGTGHCAGACA	0.01	-4.647	0.0189	270	0.0097	229.4	0.0084
PAX5-shortForm(Paired/Homeobox)/GM12878-PAX5-ChIP-Seq/Homer	GTCACGCTCSCTGM	0.1	-4.482	0.0222	182	0.0065	150.3	0.0055
Nanog(Homeobox)/mES-Nanog-ChIP-Seq/Homer	RGCCATTAAC	0.1	-4.436	0.023	5704	0.2048	5453	0.1993
RFX(HTH)/K562-RFX3-ChIP-Seq/Homer	CGGTTGCCATGGCAAC	0.1	-4.027	0.0345	133	0.0048	108.8	0.004
PQM-1(?)/cElegans-L3-ChIP-Seq(modEncode)/Homer	ACTGATAAGA	0.1	-3.873	0.0399	276	0.0099	239.3	0.0087
Pbx3(Homeobox)/GM12878-PBX3-ChIP-Seq/Homer	SCTGTCAMTCAN	0.1	-3.783	0.0434	382	0.0137	339	0.0124
ERE(NR/IR3)/MCF7-ERa-ChIP-Seq/Homer	VAGGTCACNSTGACC	0.1	-3.721	0.0459	374	0.0134	332	0.0121
Unknown2/Drosophila-Promoters/Homer	CATCMCTA	0.1	-3.62	0.0504	2007	0.0721	1890.2	0.0691
Oct4(POU/Homeobox)/mES-Oct4-ChIP-Seq/Homer	ATTTGCATAW	0.1	-3.483	0.0574	297	0.0107	261.9	0.0096
TCFL2(HMG)/K562-TCF7L2-ChIP-Seq(GSE29196)/Homer	ACWTCAAAGG	0.1	-3.434	0.0599	99	0.0036	81	0.003
Pax7-long(Paired/Homeobox)/Myoblast-Pax7-ChIP-Seq(GSE25064)/Homer	TAATCHGATTAC	0.1	-3.346	0.065	10	0.0004	5.7	0.0002
USF1(HLH)/GM12878-Usf1-ChIP-Seq/Homer	SGTCACGTGR	0.1	-3.258	0.0705	798	0.0286	736.5	0.0269
Nur77(NR)/K562-NR4A1-ChIP-Seq(GSE31363)/Homer	TGACCTTTNCNT	0.1	-3.159	0.0774	142	0.0051	120.8	0.0044
p53(p53)/p53-ChIP-Chip/Homer	NRGACATGTCYRGACATGTC	0.1	-3.052	0.0856	11	0.0004	6.1	0.0002
PBX1(Homeobox)/MCF7-PBX1-ChIP-Seq(GSE28007)/Homer	GSCTGTCACTCA	0.1	-2.932	0.0958	156	0.0056	134	0.0049
CArG(MADS)/PUER-Srf-ChIP-Seq/Homer	CCATATATGGNM	0.1	-2.928	0.0958	267	0.0096	237.5	0.0087
Rbpj1(?)/Panc1-Rbpj1-ChIP-Seq(GSE47459)/Homer	HTTTCCCASG	0.1	-2.824	0.1055	2017	0.0724	1916	0.07
Reverb(NR/DR2)/BLRP(RAW)-Reverba-ChIP-Seq/Homer	GTRGGTCASTGGGTCA	0.1	-2.805	0.1068	192	0.0069	169	0.0062
NFkB-p50,p52(RHD)/p50-ChIP-Chip/Homer	GGGGGAATCCCC	0.1	-2.768	0.1102	155	0.0056	134.2	0.0049
Srebp2(HLH)/HepG2-Srebp2-ChIP-Seq/Homer	CGGTCACSCCAC	0.1	-2.728	0.114	199	0.0071	175.4	0.0064
X-box(HTH)/NPC-H3K4me1-ChIP-Seq/Homer	GGTTGCCATGGCAA	0.1	-2.693	0.1173	135	0.0048	116.8	0.0043
PU.1-IRF(ETS:IRF)/Bcell-PU.1-ChIP-Seq(GSE21512)/Homer	MGGAAGTGAAAC	0.1	-2.612	0.1264	1580	0.0567	1497.3	0.0547
TOD6?/SacCer-Promoters/Homer)	GCGATGAGMT	0.1	-2.579	0.1298	214	0.0077	190.1	0.007
RBPJ:Ebox/Panc1-Rbpj1-ChIP-Seq(GSE47459)/Homer	GGGRAARRGRMCAGMTG	0.1	-2.567	0.1307	486	0.0174	447.2	0.0163
Tcf4(HMG)/Hct116-Tcf4-ChIP-Seq/Homer	ASATCAAAGGVA	0.1	-2.557	0.1313	468	0.0168	430.9	0.0157
EBNA1(EBV virus)/Raji-EBNA1-ChIP-Seq(GSE30709)/Homer	GGYAGCAYDTGCTDCCCNNN	0.1	-2.531	0.1338	25	0.0009	18.9	0.0007
RXR(NR/DR1)/3T3L1-RXR-ChIP-Seq/Homer	TAGGGCAAAGGTCA	0.1	-2.495	0.138	1590	0.0571	1509.6	0.0552
Pax7-longest(Paired/Homeobox)/Myoblast-Pax7-ChIP-Seq(GSE25064)/Homer	NTAATTDGCYAATTANNWWD	0.1	-2.413	0.148	6	0.0002	3.3	0.0001
DREF/Drosophila-Promoters/Homer	AVYTATCGATAD	0.1	-2.413	0.148	6	0.0002	3.6	0.0001
p53(p53)/mES-cMyc-ChIP-Seq/Homer	ACATGCCCGGGCAT	0.1	-2.397	0.1495	27	0.001	21	0.0008
Mef2c(MADS)/GM12878-Mef2c-ChIP-Seq(GSE32465)/Homer	DCYAAAAATAGM	1	-2.255	0.1714	221	0.0079	199.5	0.0073
MYB(HTH)/ERMYB-Myb-ChIPSeq(GSE22095)/Homer	GGCVGTTR	1	-2.246	0.1719	2565	0.0921	2460.8	0.09
EGR(Zf)/K562-EGR1-ChIP-Seq/Homer	TCCGCCCACGCA	1	-2.133	0.1914	398	0.0143	368.5	0.0135
PAX3:FKHR-fusion(Paired/Homeobox)/Rh4-PAX3:FKHR-ChIP-Seq/Homer	ACCRTGACTAATTNN	1	-2.12	0.1928	188	0.0067	169.2	0.0062
GRE/RAW264.7-GRE-ChIP-Seq/Homer	VAGRACAKWCTGTYC	1	-2.098	0.1961	263	0.0094	240.3	0.0088
Unknown3/Drosophila-Promoters/Homer	ACVAKCTGGCAGCGC	1	-2.089	0.1968	159	0.0057	142.8	0.0052
REB1/SacCer-Promoters/Homer	KCCGGGTAAYRR	1	-2.029	0.2078	166	0.006	149.7	0.0055
Eomes(T-box)/H9-Eomes-ChIP-Seq/Homer	AGGTGTTAAN	1	-1.962	0.221	4142	0.1487	4005.9	0.1464
LXRE(NR/DR4)/BLRP(RAW)-LXRb-ChIP-Seq/Homer	RGGTTACTANAGGTCA	1	-1.814	0.2548	66	0.0024	57.3	0.0021
LIN-15B(Zf)/cElegans-L3-LIN15B-ChIP-Seq(modEncode)/Homer	CARTGGAGCGCRYTTGCATT	1	-1.64	0.3015	5	0.0002	3.2	0.0001
PPARE(NR/DR1)/3T3L1-Pparg-ChIP-Seq/Homer	TGACCTTTGCCCCA	1	-1.561	0.3247	1255	0.0451	1205.4	0.0441
Pax7(Paired/Homeobox)/Myoblast-Pax7-ChIP-Seq(GSE25064)/Homer	TAATCAATTA	1	-1.467	0.3545	48	0.0017	42.1	0.0015
EGL-5(Homeobox)/cElegans-L3-EGL5-ChIP-Seq(modEncode)/Homer	ATTTAATGGG	1	-1.371	0.3881	1136	0.0408	1094.8	0.04
PAX5(Paired/Homeobox)/GM12878-PAX5-ChIP-Seq/Homer	GCAGCCAAGCRTGACH	1	-1.271	0.4268	677	0.0243	651	0.0238
E-box/Arabidopsis-Promoters/Homer	GCCACGTG	1	-1.245	0.4355	805	0.0289	775.8	0.0284
ELT-3(Gata)/cElegans-L1-ELT3-ChIP-Seq(modEncode)/Homer	AWTGATAAGA	1	-1.2	0.4533	257	0.0092	244.8	0.0089
E2F(E2F)/Cell-Cycle-Exp/Homer	TTSGCGCGAAAA	1	-1.111	0.4929	116	0.0042	109.4	0.004
Znf263(Zf)/K562-Znf263-ChIP-Seq/Homer	CVGTSCTCCC	1	-1.067	0.5122	3464	0.1244	3380.8	0.1236
Unknown1/Arabidopsis-Promoters/Homer	RGGGTAWWWTHGTAA	1	-1.048	0.5197	54	0.0019	50	0.0018
REST-NRSF(Zf)/Jurkat-NRSF-ChIP-Seq/Homer	GGMGCTGTCCATGGTGCTGA	1	-1.033	0.5249	16	0.0006	14.9	0.0005
Ik-1	NHTTGGGAATRCC	1	-1.018	0.5298	27854	1	27356.8	1
GLI3(Zf)/GLI3-ChIP-Chip/Homer	CGTGGGTGGTCC	1	-0.9908	0.5418	186	0.0067	178.7	0.0065
Tbet(T-box)/CD8-Tbet-ChIP-Seq(GSE33802)/Homer	AGGTGTGAAM	1	-0.939	0.5677	1201	0.0431	1170.1	0.0428
PRDM9(Zf)/Testis-DMC1-ChIP-Seq(GSE35498)/Homer	ADGGYAGYAGCATCT	1	-0.9126	0.5799	601	0.0216	584.2	0.0214
Tcfcp2l1(CP2)/mES-Tcfcp2l1-ChIP-Seq/Homer	NRAACCRGTTYRAACCRGYT	1	-0.8885	0.5911	240	0.0086	232.1	0.0085
PHA-4(Forkhead)/cElegans-Embryos-PHA4-ChIP-Seq(modEncode)/Homer	KTGTTTGC	1	-0.8812	0.5924	4401	0.158	4309.5	0.1575
Foxh1(Forkhead)/hESC-FOXH1-ChIP-Seq(GSE29422)/Homer	NNTGTGGATTSS	1	-0.8138	0.6306	578	0.0208	564.5	0.0206
TR4(NR/DR1)/Hela-TR4-ChIP-Seq/Homer	GAGGTCAAAGGTCA	1	-0.7599	0.6622	151	0.0054	147.3	0.0054
PCF/Arabidopsis-Promoters/Homer	NNWWWTGGGCYTDDN	1	-0.7223	0.6842	179	0.0064	175.8	0.0064
TRa(NR)/C17.2-TRa-ChIP-Seq(GSE38347)/Homer	GGTCANYTGAGGWCA	1	-0.702	0.6948	582	0.0209	571.2	0.0209
Oct4:Sox17/F9-Sox17-ChIP-Seq(GSE44553)/Homer	CCATTGTATGCAAAT	1	-0.7001	0.6948	89	0.0032	87.4	0.0032
ZNF143|STAF(Zf)/CUTLL-ZNF143-ChIP-Seq(GSE29600)/Homer	ATTTCCCAGVAKSCY	1	-0.6899	0.6964	602	0.0216	591.8	0.0216
SeqBias: C/A-bias	MMMMMMMMMM	1	-0.6771	0.702	27230	0.9776	26743.2	0.9776
GFY-Staf/Promoters/Homer	RACTACAATTCCCAGAAKGC	1	-0.6385	0.7261	139	0.005	137.5	0.005
EFL-1(E2F)/cElegans-L1-EFL1-ChIP-Seq(modEncode)/Homer	TGCAARYGCGCTCYA	1	-0.5725	0.7719	32	0.0011	32.8	0.0012
Tcf3(HMG)/mES-Tcf3-ChIP-Seq/Homer	ASWTCAAAGG	1	-0.556	0.7811	256	0.0092	254.2	0.0093
NRF1(NRF)/MCF7-NRF1-ChIP-Seq/Homer	CTGCGCATGCGC	1	-0.5372	0.7921	453	0.0163	449.8	0.0164
HNF6(Homeobox)/Liver-Hnf6-ChIP-Seq(ERP000394)	NTATYGATCH	1	-0.5181	0.8036	421	0.0151	418.4	0.0153
Unknown/Homeobox/Limb-p300-ChIP-Seq/Homer	SSCMATWAAA	1	-0.5177	0.8036	422	0.0152	420	0.0154
GRE(NR/IR3)/A549-GR-ChIP-Seq/Homer	NRGVACABNVTGTYCY	1	-0.4614	0.8425	153	0.0055	154.8	0.0057
Gfi1b(Zf)/HPC7-Gfi1b-ChIP-Seq/Homer	MAATCACTGC	1	-0.4298	0.8655	800	0.0287	796.4	0.0291
Sox2(HMG)/mES-Sox2-ChIP-Seq/Homer	BCCATTGTTC	1	-0.3767	0.9084	870	0.0312	868.3	0.0317
PRDM1/BMI1(Zf)/Hela-PRDM1-ChIP-Seq(GSE31477)/Homer	ACTTTCACTTTC	1	-0.2998	0.9766	480	0.0172	485.8	0.0178
p53(p53)/Saos-p53-ChIP-Seq/Homer	RRCATGYCYRGRCATGYYYN	1	-0.2845	0.9871	121	0.0043	126.1	0.0046
c-Myc(HLH)/LNCAP-cMyc-ChIP-Seq/Homer	VCCACGTG	1	-0.2742	0.9928	930	0.0334	934.6	0.0342
CTCF-SatelliteElement/CD4+-CTCF-ChIP-Seq/Homer	TGCAGTTCCMVNWRTGGCCA	1	-0.2617	1	25	0.0009	28.2	0.001
SeqBias: A/T bias	WWWWWWWWWW	1	-0.2512	1	12121	0.4352	11966.4	0.4374
Hnf1(Homeobox)/Liver-Foxa2-Chip-Seq/Homer	GGTTAAWCATTAA	1	-0.2417	1	39	0.0014	43.4	0.0016
SEP3(MADS)/Arabidoposis-Flower-Sep3-ChIP-Seq/Homer	CCAAAAAGGG	1	-0.2389	1	879	0.0316	887	0.0324
Initiator/Drosophila-Promoters/Homer	NTCAGTYG	1	-0.2195	1	2868	0.103	2859.1	0.1045
Arnt:Ahr(bHLH)/MCF7-Arnt-ChIP-Seq(Lo et al.)/Homer	TBGCACGCAA	1	-0.2179	1	1190	0.0427	1197.5	0.0438
Esrrb(NR)/mES-Esrrb-ChIP-Seq/Homer	KTGACCTTGA	1	-0.2175	1	818	0.0294	827.1	0.0302
Sox6(HMG)/Myotubes-Sox6-ChIP-Seq(GSE32627)/Homer	CCATTGTTNY	1	-0.2157	1	1622	0.0582	1626.7	0.0595
Unknown2/Arabidopsis-Promoters/Homer	AAACGACGTCGTTTT	1	-0.2121	1	2	0.0001	3.7	0.0001
T1ISRE(IRF)/Ifnb-Exp/Homer	ACTTTCGTTTCT	1	-0.1763	1	5	0.0002	8	0.0003
SFP1/SacCer-Promoters/Homer	DDAAAAATTTTY	1	-0.1614	1	18	0.0006	23	0.0008
DPL-1(E2F)/cElegans-Adult-ChIP-Seq(modEncode)/Homer	TAGCGCGC	1	-0.1516	1	1832	0.0658	1844	0.0674
HIF2a(HLH)/O785-HIF2a-ChIP-Seq(GSE34871)/Homer	GCACGTACCC	1	-0.1486	1	542	0.0195	557.7	0.0204
bHLHE40(HLH)/HepG2-BHLHE40-ChIP-Seq/Homer	SGKCACGTGM	1	-0.1108	1	299	0.0107	315.6	0.0115
Mouse_Recombination_Hotspot/Testis-DMC1-ChIP-Seq/Homer	ACTYKNATTCGTGNTACTTC	1	-0.09236	1	41	0.0015	49.1	0.0018
CHR/Cell-Cycle-Exp/Homer	SRGTTTCAAA	1	-0.05917	1	351	0.0126	374.7	0.0137
GATA-DR8(Zf)/iTreg-Gata3-ChIP-Seq(GSE20898)/Homer	AGATSTNDNNDSAGATAASN	1	-0.0558	1	53	0.0019	64.7	0.0024
Sox3(HMG)/NPC-Sox3-ChIP-Seq(GSE33059)/Homer	CCWTTGTY	1	-0.05515	1	1873	0.0672	1906.2	0.0697
SeqBias: GA-repeat	GAGAGAGAGA	1	-0.05036	1	10460	0.3755	10404.9	0.3803
p63(p53)/Keratinocyte-p63-ChIP-Seq/Homer	NNDRCATGYCYNRRCATGYH	1	-0.04204	1	528	0.019	558.7	0.0204
NFY(CCAAT)/Promoter/Homer	RGCCAATSRG	1	-0.03155	1	1154	0.0414	1195.6	0.0437
CES-1(Homeobox)/cElegans-L1-CES1-ChIP-Seq(modEncode)/Homer	AAATTSAATTTN	1	-0.01972	1	240	0.0086	268.8	0.0098
FXR(NR/IR1)/Liver-FXR-ChIP-Seq/Homer	AGGTCANTGACCTB	1	-0.01898	1	526	0.0189	564.4	0.0206
TATA-box/Drosophila-Promoters/Homer	CTATAAAAGCSV	1	-0.01509	1	34	0.0012	47.1	0.0017
Maz(Zf)/HepG2-Maz-ChIP-Seq(GSE31477)/Homer	GGGGGGGG	1	-0.01425	1	2566	0.0921	2625.4	0.096
Unknown4/Arabidopsis-Promoters/Homer	CKTCKTCTTY	1	-0.008346	1	1156	0.0415	1215.7	0.0444
HNF4a(NR/DR1)/HepG2-HNF4a-ChIP-Seq/Homer	CARRGKBCAAAGTYCA	1	-0.007525	1	545	0.0196	592.7	0.0217
HIF-1a(HLH)/MCF7-HIF1a-ChIP-Seq/Homer	TACGTGCV	1	-0.005483	1	373	0.0134	416.2	0.0152
GAGA-repeat/SacCer-Promoters/Homer	CTYTCTYTCTCTCTC	1	-0.00503	1	4916	0.1765	4990.9	0.1824
GAGA-repeat/Arabidopsis-Promoters/Homer	CTCTCTCTCY	1	-0.004325	1	1772	0.0636	1847.6	0.0675
Unknown1(NR/Ini-like)/Drosophila-Promoters/Homer	MYGGTCACACTG	1	-0.00416	1	216	0.0078	252.2	0.0092
PRDM14(Zf)/H1-PRDM14-ChIP-Seq/Homer	RGGTCTCTAACY	1	-0.002826	1	274	0.0098	316.7	0.0116
Oct2(POU/Homeobox)/Bcell-Oct2-ChIP-Seq/Homer	ATATGCAAAT	1	-0.002465	1	147	0.0053	180.5	0.0066
Nkx3.1(Homeobox)/LNCaP-Nkx3.1-ChIP-Seq(GSE28264)/Homer	AAGCACTTAA	1	-0.001216	1	3147	0.113	3250.8	0.1188
SeqBias: GCW-triplet	GCWGCWGCWGCW	1	-0.000676	1	27614	0.9914	27165.5	0.993
Pho4(bHLH)/Yeast-Pho4-ChIP-Seq(GSE29506)/Homer	AAGCACGTGBGD	1	-0.000504	1	308	0.0111	362.9	0.0133
Pitx1(Homeobox)/Chicken-Pitx1-ChIP-Seq(GSE38910)/Homer	TAATCCCN	1	-0.000218	1	5024	0.1804	5158.2	0.1886
SeqBias: polyC-repeat	CCCCCCCCCC	1	-0.000146	1	27396	0.9836	26977.7	0.9861
NRF1/Promoter/Homer	STGCGCATGCGC	1	-0.000117	1	515	0.0185	591.1	0.0216
ARE(NR)/LNCAP-AR-ChIP-Seq(GSE27824)/Homer	RGRACASNSTGTYCYB	1	-0.0001	1	304	0.0109	366.2	0.0134
SeqBias: CG-repeat	CGCGCGCGCG	1	-2.3e-05	1	4944	0.1775	5114.8	0.187
FOXA1:AR/LNCAP-AR-ChIP-Seq(GSE27824)/Homer	AGTAAACAAAAAAGAACAND	1	-1.5e-05	1	21	0.0008	46	0.0017
Max(HLH)/K562-Max-ChIP-Seq/Homer	RCCACGTGGYYN	1	-1.4e-05	1	1100	0.0395	1219.4	0.0446
Rfx5(HTH)/GM12878-Rfx5-ChIP-Seq(GSE31477)/Homer	SCCTAGCAACAG	1	-1e-05	1	440	0.0158	525.6	0.0192
Nkx2.1(Homeobox)/H3122-NKX2.1-ChIP-Seq(GSE39998)/Homer	CCACTCAA	1	-9e-06	1	2941	0.1056	3109.6	0.1137
OCT4-SOX2-TCF-NANOG((POU/Homeobox/HMG)/mES-ChIP-Seq/Homer	ATTTGCATAACAATG	1	-5e-06	1	65	0.0023	106	0.0039
TATA-Box(TBP)/Promoter/Homer	CCTTTTAWAGSC	1	-3e-06	1	913	0.0328	1034.7	0.0378
VDR(NR/DR3)/GM10855-VDR+vitD-ChIP-Seq/Homer	ARAGGTCANWGAGTTCANNN	1	-1e-06	1	176	0.0063	241.9	0.0088
CRX(Homeobox)/Retina-Crx-ChIP-Seq/Homer	GCTAATCC	1	-1e-06	1	2511	0.0901	2700.2	0.0987
PIF5ox(bHLH)/Arabidopsis-PIF5ox-ChIP-Seq(GSE35062)/Homer	BCACGTGVDN	1	0	1	1598	0.0574	1768.8	0.0647
Erra(NR)/HepG2-Erra-ChIP-Seq/Homer	CAAAGGTCAG	1	0	1	3464	0.1244	3684	0.1347
Pho2(bHLH)/Yeast-Pho2-ChIP-Seq(GSE29506)/Homer	CCCACGTGCT	1	0	1	726	0.0261	855.6	0.0313
SeqBias: CA-repeat	CACACACACA	1	0	1	8650	0.3105	8914.8	0.3259
RLR1?/SacCer-Promoters/Homer	WTTTTCYYTTTT	1	0	1	215	0.0077	301.7	0.011
Unknown6/Drosophila-Promoters/Homer	AATTTTAAAA	1	0	1	268	0.0096	366.9	0.0134
Nr5a2(NR)/Pancreas-LRH1-ChIP-Seq(GSE34295)/Homer	BTCAAGGTCA	1	0	1	986	0.0354	1153.7	0.0422
Nr5a2(NR)/mES-Nr5a2-ChIP-Seq/Homer	BTCAAGGTCA	1	0	1	739	0.0265	894.3	0.0327
n-Myc(HLH)/mES-nMyc-ChIP-Seq/Homer	VRCCACGTGG	1	0	1	1203	0.0432	1393.3	0.0509
TATA-box/SacCer-Promoters/Homer	BBHWTATATA	1	0	1	187	0.0067	280.4	0.0102
E2A-nearPU.1(HLH)/Bcell-PU.1-ChIP-Seq(GSE21512)/Homer	NVCACCTGBN	1	0	1	2456	0.0882	2729.2	0.0998
AR-halfsite(NR)/LNCaP-AR-ChIP-Seq(GSE27824)/Homer	CCAGGAACAG	1	0	1	6518	0.234	6880.1	0.2515
Nkx2.5(Homeobox)/HL1-Nkx2.5.biotin-ChIP-Seq/Homer	RRSCACTYAA	1	0	1	2894	0.1039	3196.7	0.1169
c-Myc/mES-cMyc-ChIP-Seq/Homer	VVCCACGTGG	1	0	1	816	0.0293	1023.7	0.0374
SeqBias: TA-repeat	TATATATATA	1	0	1	1240	0.0445	1493.6	0.0546
PR(NR)/T47D-PR-ChIP-Seq(GSE31130)/Homer	VAGRACAKNCTGTBC	1	0	1	2703	0.097	3060	0.1119
RARg(NR)/ES-RARg-ChIP-Seq(GSE30538)/Homer	AGGTCAAGGTCA	1	0	1	34	0.0012	149.3	0.0055
SeqBias: G/A bias	RRRRRRRRRR	1	0	1	27268	0.979	26955.4	0.9853
