# Supplementary material for: Identification of the transcription factor ZEB1 as a central component of the adipogenic gene regulatory network
Source: eLife journal article supplement (doi:10.7554/elife.03346), 2014-08-26
Supplement: supp [file elife_poa_e03346_Supplementary_file_6.xlsx]

## Sheet: Table 6 - Mass Spectrometry
Protein ID	Protein Description (green - previously known interactions; red - novel interactions with TFs having enriched motifs in ZEB1 bound regions)	Peptides (Rep1)	Peptides (Rep2)	Protein Name	Class (3="both"; 2="Rep1"; 1="Rep2")
A2ACG7 (+1)	Dolichyl-diphosphooligosaccharide--protein glycosyltransferase subunit 2 OS=Mus musculus GN=Rpn2 PE=4 SV=1	100 % (2)	74 % (1)	Rpn2	3
D3YWP3 (+1)	MCG1034428 OS=Mus musculus GN=Rpl23a-ps3 PE=3 SV=1	100 % (5)	100 % (3)	Rpl23a-ps3	3
E0CXB1 (+1)	Proteasome subunit alpha type-6 OS=Mus musculus GN=Psma6 PE=4 SV=1	100 % (3)	100 % (2)	Psma6	3
E9PVC5 (+4)	Eukaryotic translation initiation factor 4 gamma 1 OS=Mus musculus GN=Eif4g1 PE=4 SV=1	91 % (1)	0 % (0)	Eif4g1	3
E9PW69 (+1)	Proteasome subunit alpha type (Fragment) OS=Mus musculus GN=Psma4 PE=3 SV=1	100 % (4)	73 % (1)	Psma4	3
E9Q1T9 (+1)	Exportin-2 OS=Mus musculus GN=Cse1l PE=4 SV=1	50 % (1)	0 % (0)	Cse1l	3
E9Q2H1	E3 ubiquitin-protein ligase UBR5 OS=Mus musculus GN=Ubr5 PE=4 SV=1	19 % (0)	0 % (0)	Ubr5	3
E9QAS4 (+2)	Chromodomain-helicase-DNA-binding protein 4 OS=Mus musculus GN=Chd4 PE=4 SV=1	100 % (17)	100 % (42)	Chd4	3
E9QB02 (+1)	Methionine--tRNA ligase, cytoplasmic OS=Mus musculus GN=Mars PE=3 SV=1	100 % (2)	100 % (1)	Mars	3
E9QMN5 (+1)	Transcriptional repressor p66 alpha OS=Mus musculus GN=Gatad2a PE=4 SV=1	100 % (9)	100 % (20)	Gatad2a	3
F8WIX8 (+2)	Histone H2A OS=Mus musculus GN=Hist1h2al PE=3 SV=1	100 % (3)	80 % (1)	Hist1h2al	3
G3UYV7 (+1)	40S ribosomal protein S28 (Fragment) OS=Mus musculus GN=Rps28 PE=4 SV=1	100 % (2)	100 % (2)	Rps28	3
G3UZI2 (+3)	Heterogeneous nuclear ribonucleoprotein Q OS=Mus musculus GN=Syncrip PE=4 SV=1	100 % (3)	98 % (1)	Syncrip	3
G3X922	MCG115602 OS=Mus musculus GN=Dnajc13 PE=4 SV=1	100 % (2)	100 % (2)	Dnajc13	3
G5E902 (+1)	MCG10343, isoform CRA_b OS=Mus musculus GN=Slc25a3 PE=3 SV=1	100 % (2)	100 % (1)	Slc25a3	3
J3KMM5 (+2)	Sarcoplasmic/endoplasmic reticulum calcium ATPase 2 OS=Mus musculus GN=Atp2a2 PE=3 SV=1	100 % (1)	100 % (0)	Atp2a2	3
O09061	Proteasome subunit beta type-1 OS=Mus musculus GN=Psmb1 PE=1 SV=1	91 % (1)	0 % (0)	Psmb1	3
O09106	Histone deacetylase 1 OS=Mus musculus GN=Hdac1 PE=1 SV=1	100 % (11)	100 % (19)	Hdac1	3
O35343	Importin subunit alpha-4 OS=Mus musculus GN=Kpna4 PE=2 SV=1	100 % (3)	100 % (11)	Kpna4	3
O54962	Barrier-to-autointegration factor OS=Mus musculus GN=Banf1 PE=1 SV=1	100 % (5)	100 % (3)	Banf1	3
O55029	Coatomer subunit beta' OS=Mus musculus GN=Copb2 PE=2 SV=2	100 % (5)	0 % (0)	Copb2	3
O55234	Proteasome subunit beta type-5 OS=Mus musculus GN=Psmb5 PE=1 SV=3	100 % (4)	100 % (1)	Psmb5	3
P02301 (+1)	Histone H3.3C OS=Mus musculus GN=H3f3c PE=1 SV=3	100 % (4)	0 % (0)	H3f3c	3
P11688	Integrin alpha-5 OS=Mus musculus GN=Itga5 PE=1 SV=3	100 % (2)	0 % (0)	Itga5	3
P11983	T-complex protein 1 subunit alpha OS=Mus musculus GN=Tcp1 PE=1 SV=3	100 % (4)	100 % (3)	Tcp1	3
P14152	Malate dehydrogenase, cytoplasmic OS=Mus musculus GN=Mdh1 PE=1 SV=3	91 % (0)	73 % (0)	Mdh1	3
P26041	Moesin OS=Mus musculus GN=Msn PE=1 SV=3	100 % (3)	0 % (0)	Msn	3
P28033	CCAAT/enhancer-binding protein beta OS=Mus musculus GN=Cebpb PE=1 SV=1	100 % (5)	100 % (4)	Cebpb	3
P30412	Peptidyl-prolyl cis-trans isomerase C OS=Mus musculus GN=Ppic PE=1 SV=1	100 % (3)	80 % (0)	Ppic	3
P35550	rRNA 2'-O-methyltransferase fibrillarin OS=Mus musculus GN=Fbl PE=1 SV=2	100 % (3)	73 % (1)	Fbl	3
P40124	Adenylyl cyclase-associated protein 1 OS=Mus musculus GN=Cap1 PE=1 SV=4	56 % (1)	0 % (0)	Cap1	3
P45376	Aldose reductase OS=Mus musculus GN=Akr1b1 PE=1 SV=3	100 % (3)	100 % (1)	Akr1b1	3
P51150	Ras-related protein Rab-7a OS=Mus musculus GN=Rab7a PE=1 SV=2	100 % (3)	100 % (0)	Rab7a	3
P56546 (+2)	C-terminal-binding protein 2 OS=Mus musculus GN=Ctbp2 PE=1 SV=2	100 % (4)	100 % (12)	Ctbp2	3
P61358	60S ribosomal protein L27 OS=Mus musculus GN=Rpl27 PE=2 SV=2	100 % (3)	100 % (5)	Rpl27	3
P61514	60S ribosomal protein L37a OS=Mus musculus GN=Rpl37a PE=2 SV=2	100 % (4)	100 % (2)	Rpl37a	3
P61750	ADP-ribosylation factor 4 OS=Mus musculus GN=Arf4 PE=2 SV=2	100 % (3)	100 % (2)	Arf4	3
P62317	Small nuclear ribonucleoprotein Sm D2 OS=Mus musculus GN=Snrpd2 PE=2 SV=1	100 % (3)	99 % (1)	Snrpd2	3
P62843	40S ribosomal protein S15 OS=Mus musculus GN=Rps15 PE=2 SV=2	100 % (4)	100 % (2)	Rps15	3
P62855	40S ribosomal protein S26 OS=Mus musculus GN=Rps26 PE=2 SV=3	100 % (3)	100 % (5)	Rps26	3
P62900	60S ribosomal protein L31 OS=Mus musculus GN=Rpl31 PE=2 SV=1	100 % (2)	100 % (3)	Rpl31	3
P62960	Nuclease-sensitive element-binding protein 1 OS=Mus musculus GN=Ybx1 PE=1 SV=3	100 % (4)	100 % (2)	Ybx1	3
P63325	40S ribosomal protein S10 OS=Mus musculus GN=Rps10 PE=1 SV=1	100 % (3)	100 % (4)	Rps10	3
P68040	Guanine nucleotide-binding protein subunit beta-2-like 1 OS=Mus musculus GN=Gnb2l1 PE=1 SV=3	100 % (2)	99 % (1)	Gnb2l1	3
P70168	Importin subunit beta-1 OS=Mus musculus GN=Kpnb1 PE=1 SV=2	100 % (5)	100 % (0)	Kpnb1	3
P70288	Histone deacetylase 2 OS=Mus musculus GN=Hdac2 PE=1 SV=1	100 % (4)	100 % (13)	Hdac2	3
P80313	T-complex protein 1 subunit eta OS=Mus musculus GN=Cct7 PE=1 SV=1	100 % (4)	58 % (0)	Cct7	3
P80317	T-complex protein 1 subunit zeta OS=Mus musculus GN=Cct6a PE=1 SV=3	100 % (4)	100 % (1)	Cct6a	3
Q01320	DNA topoisomerase 2-alpha OS=Mus musculus GN=Top2a PE=1 SV=2	50 % (1)	100 % (1)	Top2a	3
Q08943 (+2)	FACT complex subunit SSRP1 OS=Mus musculus GN=Ssrp1 PE=1 SV=2	100 % (2)	100 % (5)	Ssrp1	3
Q3U0V1	Far upstream element-binding protein 2 OS=Mus musculus GN=Khsrp PE=1 SV=2	98 % (1)	68 % (0)	Khsrp	3
Q60972	Histone-binding protein RBBP4 OS=Mus musculus GN=Rbbp4 PE=1 SV=5	100 % (12)	100 % (9)	Rbbp4	3
Q61033	Lamina-associated polypeptide 2, isoforms alpha/zeta OS=Mus musculus GN=Tmpo PE=1 SV=4	100 % (23)	100 % (20)	Tmpo	3
Q61553	Fascin OS=Mus musculus GN=Fscn1 PE=1 SV=4	100 % (3)	100 % (2)	Fscn1	3
Q61753	D-3-phosphoglycerate dehydrogenase OS=Mus musculus GN=Phgdh PE=1 SV=3	100 % (3)	100 % (0)	Phgdh	3
Q61768	Kinesin-1 heavy chain OS=Mus musculus GN=Kif5b PE=1 SV=3	100 % (2)	0 % (0)	Kif5b	3
Q64318	Zinc finger E-box-binding homeobox 1 OS=Mus musculus GN=Zeb1 PE=1 SV=1	100 % (43)	100 % (42)	Zeb1	3
Q64511	DNA topoisomerase 2-beta OS=Mus musculus GN=Top2b PE=1 SV=2	100 % (3)	100 % (14)	Top2b	3
Q6ZQ38	Cullin-associated NEDD8-dissociated protein 1 OS=Mus musculus GN=Cand1 PE=2 SV=2	100 % (4)	0 % (0)	Cand1	3
Q6ZWX6	Eukaryotic translation initiation factor 2 subunit 1 OS=Mus musculus GN=Eif2s1 PE=1 SV=3	100 % (2)	100 % (2)	Eif2s1	3
Q78PY7	Staphylococcal nuclease domain-containing protein 1 OS=Mus musculus GN=Snd1 PE=1 SV=1	100 % (3)	0 % (0)	Snd1	3
Q7TSH3	Zinc finger protein 516 OS=Mus musculus GN=Znf516 PE=2 SV=1	100 % (15)	100 % (21)	Znf516	3
Q811S7 (+1)	Upstream-binding protein 1 OS=Mus musculus GN=Ubp1 PE=1 SV=1	100 % (4)	100 % (4)	Ubp1	3
Q8BGQ7	Alanine--tRNA ligase, cytoplasmic OS=Mus musculus GN=Aars PE=1 SV=1	100 % (2)	0 % (0)	Aars	3
Q8BL97 (+3)	Serine/arginine-rich splicing factor 7 OS=Mus musculus GN=Srsf7 PE=1 SV=1	78 % (1)	100 % (0)	Srsf7	3
Q8JZQ9	Eukaryotic translation initiation factor 3 subunit B OS=Mus musculus GN=Eif3b PE=1 SV=1	100 % (4)	50 % (0)	Eif3b	3
Q8JZU2	Protein Slc25a1 OS=Mus musculus GN=Slc25a1 PE=2 SV=1	100 % (4)	100 % (5)	Slc25a1	3
Q8R1B4	Eukaryotic translation initiation factor 3 subunit C OS=Mus musculus GN=Eif3c PE=1 SV=1	100 % (3)	0 % (0)	Eif3c	3
Q8VHR5	Transcriptional repressor p66-beta OS=Mus musculus GN=Gatad2b PE=1 SV=1	100 % (12)	100 % (23)	Gatad2b	3
Q91VR5	ATP-dependent RNA helicase DDX1 OS=Mus musculus GN=Ddx1 PE=1 SV=1	100 % (3)	12 % (0)	Ddx1	3
Q91YN9	BAG family molecular chaperone regulator 2 OS=Mus musculus GN=Bag2 PE=1 SV=1	100 % (2)	100 % (3)	Bag2	3
Q921M3 (+1)	Splicing factor 3B subunit 3 OS=Mus musculus GN=Sf3b3 PE=2 SV=1	100 % (2)	50 % (1)	Sf3b3	3
Q922Q8	Leucine-rich repeat-containing protein 59 OS=Mus musculus GN=Lrrc59 PE=2 SV=1	100 % (2)	99 % (1)	Lrrc59	3
Q923G2	DNA-directed RNA polymerases I, II, and III subunit RPABC3 OS=Mus musculus GN=Polr2h PE=2 SV=3	100 % (2)	80 % (0)	Polr2h	3
Q99LC5	Electron transfer flavoprotein subunit alpha, mitochondrial OS=Mus musculus GN=Etfa PE=1 SV=2	100 % (4)	0 % (0)	Etfa	3
Q99PV0	Pre-mRNA-processing-splicing factor 8 OS=Mus musculus GN=Prpf8 PE=1 SV=2	98 % (1)	0 % (0)	Prpf8	3
Q9CQ10	Charged multivesicular body protein 3 OS=Mus musculus GN=Chmp3 PE=1 SV=3	100 % (2)	100 % (1)	Chmp3	3
Q9D1M4	Eukaryotic translation elongation factor 1 epsilon-1 OS=Mus musculus GN=Eef1e1 PE=2 SV=1	100 % (3)	100 % (0)	Eef1e1	3
Q9D6Z1	Nucleolar protein 56 OS=Mus musculus GN=Nop56 PE=1 SV=2	100 % (2)	50 % (1)	Nop56	3
Q9D8B3	Charged multivesicular body protein 4b OS=Mus musculus GN=Chmp4b PE=2 SV=2	100 % (2)	100 % (4)	Chmp4b	3
Q9DB34	Charged multivesicular body protein 2a OS=Mus musculus GN=Chmp2a PE=1 SV=1	100 % (7)	100 % (2)	Chmp2a	3
Q9DCW4	Electron transfer flavoprotein subunit beta OS=Mus musculus GN=Etfb PE=1 SV=3	99 % (1)	20 % (0)	Etfb	3
Q9JIF7	Coatomer subunit beta OS=Mus musculus GN=Copb1 PE=1 SV=1	100 % (2)	100 % (0)	Copb1	3
Q9JIK5	Nucleolar RNA helicase 2 OS=Mus musculus GN=Ddx21 PE=1 SV=3	50 % (1)	50 % (1)	Ddx21	3
Q9JKF1	Ras GTPase-activating-like protein IQGAP1 OS=Mus musculus GN=Iqgap1 PE=1 SV=2	50 % (1)	50 % (0)	Iqgap1	3
Q9R190	Metastasis-associated protein MTA2 OS=Mus musculus GN=Mta2 PE=1 SV=1	100 % (17)	100 % (16)	Mta2	3
Q9WU78 (+1)	Programmed cell death 6-interacting protein OS=Mus musculus GN=Pdcd6ip PE=1 SV=3	100 % (3)	100 % (1)	Pdcd6ip	3
Q9Z110 (+1)	Delta-1-pyrroline-5-carboxylate synthase OS=Mus musculus GN=Aldh18a1 PE=2 SV=2	73 % (1)	74 % (0)	Aldh18a1	3
Q9Z2U0	Proteasome subunit alpha type-7 OS=Mus musculus GN=Psma7 PE=1 SV=1	100 % (5)	73 % (0)	Psma7	3
A2A7Q5 (+3)	Leprecan 1 OS=Mus musculus GN=Lepre1 PE=4 SV=1	100 % (2)	NA	Lepre1	2
A2ACH6 (+1)	Delta-sarcoglycan OS=Mus musculus GN=Sgcd PE=4 SV=1	100 % (2)	NA	Sgcd	2
A2AFI9 (+1)	Histone-binding protein RBBP7 OS=Mus musculus GN=Rbbp7 PE=4 SV=1	100 % (3)	NA	Rbbp7	2
A2AH85 (+2)	116 kDa U5 small nuclear ribonucleoprotein component OS=Mus musculus GN=Eftud2 PE=4 SV=1	21 % (0)	NA	Eftud2	2
A2AL12 (+5)	Heterogeneous nuclear ribonucleoprotein A3 OS=Mus musculus GN=Hnrnpa3 PE=4 SV=1	100 % (4)	NA	Hnrnpa3	2
A2API8 (+2)	A kinase (PRKA) anchor protein 2 OS=Mus musculus GN=Akap2 PE=4 SV=1	100 % (10)	NA	Akap2	2
A2ATP5 (+5)	Myelin basic protein expression factor 2, repressor OS=Mus musculus GN=Myef2 PE=4 SV=1	56 % (1)	NA	Myef2	2
A2AWT7 (+4)	Nucleolar transcription factor 1 OS=Mus musculus GN=Ubtf PE=4 SV=1	100 % (3)	NA	Ubtf	2
A3KG93 (+2)	Amine oxidase (Flavin containing) domain 2 OS=Mus musculus GN=Kdm1a PE=4 SV=1	100 % (9)	NA	Kdm1a	2
B1AVD1 (+2)	Protein Xpnpep2 OS=Mus musculus GN=Xpnpep2 PE=3 SV=1	100 % (2)	NA	Xpnpep2	2
B2RQE8	Rho GTPase-activating protein 42 OS=Mus musculus GN=Arhgap42 PE=2 SV=1	100 % (4)	NA	Arhgap42	2
B9EHJ3 (+1)	Tight junction protein ZO-1 OS=Mus musculus GN=Tjp1 PE=2 SV=1	100 % (3)	NA	Tjp1	2
D3YTR5 (+3)	Methyl-CpG-binding domain protein 3 OS=Mus musculus GN=Mbd3 PE=4 SV=1	100 % (5)	NA	Mbd3	2
D3YTS1 (+3)	Sec11-like 1 (S. cerevisiae), isoform CRA_d OS=Mus musculus GN=Sec11a PE=4 SV=1	100 % (2)	NA	Sec11a	2
D3YX79 (+1)	Proteasome subunit alpha type OS=Mus musculus GN=Gm8394 PE=3 SV=1	100 % (2)		Gm8394	2
D3YYB1 (+4)	Septin-2 (Fragment) OS=Mus musculus GN=Sept2 PE=4 SV=1	91 % (1)	NA	2002-09-01	2
D3Z0S1 (+1)	Annexin (Fragment) OS=Mus musculus GN=Anxa4 PE=3 SV=1	100 % (2)		Anxa4	2
D3Z0Y2 (+2)	Peroxiredoxin-6 OS=Mus musculus GN=Prdx6 PE=4 SV=1	100 % (2)	NA	Prdx6	2
D3Z158 (+2)	Protein Qars OS=Mus musculus GN=Qars PE=3 SV=1	50 % (1)	NA	Qars	2
D3Z1V4 (+1)	Phosphatidylethanolamine-binding protein 1 OS=Mus musculus GN=Pebp1 PE=4 SV=1	100 % (2)	NA	Pebp1	2
D3Z6B9 (+1)	Mitochondrial 10-formyltetrahydrofolate dehydrogenase OS=Mus musculus GN=Aldh1l2 PE=3 SV=1	50 % (1)	NA	Aldh1l2	2
D3Z7D5 (+1)	Collagen alpha-2(VI) chain OS=Mus musculus GN=Col6a2 PE=4 SV=1	100 % (2)	NA	Col6a2	2
E9PWL0	Protein Trim30d OS=Mus musculus GN=Trim30d PE=4 SV=1	100 % (2)	NA	Trim30d	2
E9Q1G8 (+2)	Septin-7 OS=Mus musculus GN=Sept7 PE=3 SV=2	100 % (3)	NA	2007-09-01	2
E9Q5C9	Protein Nolc1 OS=Mus musculus GN=Nolc1 PE=4 SV=1	50 % (1)	NA	Nolc1	2
E9Q8Z5 (+2)	Catenin delta-1 OS=Mus musculus GN=Ctnnd1 PE=4 SV=1	100 % (6)	NA	Ctnnd1	2
E9QP46	Nesprin-2 OS=Mus musculus GN=Syne2 PE=4 SV=1	100 % (2)	NA	Syne2	2
F2Z456 (+3)	NADH-cytochrome b5 reductase 3 OS=Mus musculus GN=Cyb5r3 PE=4 SV=1	100 % (2)	NA	Cyb5r3	2
F2Z4B3 (+2)	Cyclin-dependent kinase 2-associated protein 1 OS=Mus musculus GN=Cdk2ap1 PE=4 SV=1	100 % (3)	NA	Cdk2ap1	2
F6ZV59 (+6)	Heterogeneous nuclear ribonucleoprotein D0 (Fragment) OS=Mus musculus GN=Hnrnpd PE=4 SV=1	64 % (1)	NA	Hnrnpd	2
F8VPM7 (+3)	ELKS/Rab6-interacting/CAST family member 1 OS=Mus musculus GN=Erc1 PE=4 SV=1	100 % (4)	NA	Erc1	2
F8WHY8	Metastasis-associated protein MTA1 OS=Mus musculus GN=Mta1 PE=4 SV=1	100 % (22)	NA	Mta1	2
G3UYD0 (+7)	General transcription factor II-I OS=Mus musculus GN=Gtf2i PE=4 SV=1	100 % (4)	NA	Gtf2i	2
G3UYU4 (+1)	Flotillin-1 OS=Mus musculus GN=Flot1 PE=4 SV=1	100 % (2)	NA	Flot1	2
G3UZZ3 (+6)	Dynamin-2 (Fragment) OS=Mus musculus GN=Dnm2 PE=3 SV=1	50 % (1)	NA	Dnm2	2
G3X9B1	HEAT repeat containing 1 OS=Mus musculus GN=Heatr1 PE=4 SV=1	66 % (0)	NA	Heatr1	2
G5E924 (+1)	Heterogeneous nuclear ribonucleoprotein L (Fragment) OS=Mus musculus GN=Hnrnpl PE=4 SV=1	100 % (1)		Hnrnpl	2
H3BIY9 (+2)	AP-2 complex subunit beta OS=Mus musculus GN=Ap2b1 PE=4 SV=1	100 % (9)	NA	Ap2b1	2
H3BKF6 (+2)	Homeobox protein cut-like 1 OS=Mus musculus GN=Cux1 PE=3 SV=1	100 % (3)	NA	Cux1	2
H3BKH3 (+2)	DNA-binding protein SATB2 OS=Mus musculus GN=Satb2 PE=3 SV=1	100 % (3)	NA	Satb2	2
H7BX95 (+1)	Serine/arginine-rich-splicing factor 1 OS=Mus musculus GN=Srsf1 PE=4 SV=1	100 % (4)		Srsf1	2
I7HLV2 (+2)	60S ribosomal protein L10 (Fragment) OS=Mus musculus GN=Rpl10 PE=4 SV=1	100 % (6)	NA	Rpl10	2
J3QMQ5 (+2)	MCG129396 OS=Mus musculus GN=Gm6430 PE=4 SV=1	100 % (2)	NA	Gm6430	2
O08750	Nuclear factor interleukin-3-regulated protein OS=Mus musculus GN=Nfil3 PE=1 SV=1	100 % (2)	NA	Nfil3	2
O08972 (+1)	Dimethylarginine dimethylaminohydrolase 2, isoform CRA_a OS=Mus musculus GN=Ddah2 PE=2 SV=1	100 % (6)	NA	Ddah2	2
O09044 (+1)	Synaptosomal-associated protein 23 OS=Mus musculus GN=Snap23 PE=1 SV=1	100 % (4)	NA	Snap23	2
O54790	Transcription factor MafG OS=Mus musculus GN=Mafg PE=1 SV=1	100 % (2)	NA	Mafg	2
O70250 (+1)	Phosphoglycerate mutase 2 OS=Mus musculus GN=Pgam2 PE=1 SV=3	100 % (2)	NA	Pgam2	2
O70435	Proteasome subunit alpha type-3 OS=Mus musculus GN=Psma3 PE=1 SV=3	100 % (3)	NA	Psma3	2
O88712 (+1)	C-terminal-binding protein 1 OS=Mus musculus GN=Ctbp1 PE=1 SV=2	100 % (7)	NA	Ctbp1	2
P01831	Thy-1 membrane glycoprotein OS=Mus musculus GN=Thy1 PE=1 SV=1	100 % (4)	NA	Thy1	2
P0C0S6 (+1)	Histone H2A.Z OS=Mus musculus GN=H2afz PE=1 SV=2	100 % (2)	NA	H2afz	2
P10853 (+7)	Histone H2B type 1-F/J/L OS=Mus musculus GN=Hist1h2bf PE=1 SV=2	100 % (6)	NA	Hist1h2bf	2
P11438	Lysosome-associated membrane glycoprotein 1 OS=Mus musculus GN=Lamp1 PE=1 SV=2	29 % (0)		Lamp1	2
P14733	Lamin-B1 OS=Mus musculus GN=Lmnb1 PE=1 SV=3	56 % (1)	NA	Lmnb1	2
P15306	Thrombomodulin OS=Mus musculus GN=Thbd PE=1 SV=1	100 % (2)	NA	Thbd	2
P17427	AP-2 complex subunit alpha-2 OS=Mus musculus GN=Ap2a2 PE=1 SV=2	100 % (2)		Ap2a2	2
P18872-2	Isoform Alpha-2 of Guanine nucleotide-binding protein G(o) subunit alpha OS=Mus musculus GN=Gnao1	100 % (5)	NA	Gnao1	2
P19157	Glutathione S-transferase P 1 OS=Mus musculus GN=Gstp1 PE=1 SV=2	100 % (2)	NA	Gstp1	2
P21278	Guanine nucleotide-binding protein subunit alpha-11 OS=Mus musculus GN=Gna11 PE=1 SV=1	100 % (3)	NA	Gna11	2
P23475	X-ray repair cross-complementing protein 6 OS=Mus musculus GN=Xrcc6 PE=1 SV=5	100 % (2)	NA	Xrcc6	2
P27048 (+1)	Small nuclear ribonucleoprotein-associated protein B OS=Mus musculus GN=Snrpb PE=1 SV=1	99 % (1)		Snrpb	2
P27641	X-ray repair cross-complementing protein 5 OS=Mus musculus GN=Xrcc5 PE=2 SV=4	100 % (5)	NA	Xrcc5	2
P45377	Aldose reductase-related protein 2 OS=Mus musculus GN=Akr1b8 PE=1 SV=2	64 % (1)	NA	Akr1b8	2
P49312 (+2)	Heterogeneous nuclear ribonucleoprotein A1 OS=Mus musculus GN=Hnrnpa1 PE=1 SV=2	100 % (2)	NA	Hnrnpa1	2
P50518	V-type proton ATPase subunit E 1 OS=Mus musculus GN=Atp6v1e1 PE=1 SV=2	100 % (2)	NA	Atp6v1e1	2
P51655	Glypican-4 OS=Mus musculus GN=Gpc4 PE=2 SV=2	100 % (3)	NA	Gpc4	2
P51863	V-type proton ATPase subunit d 1 OS=Mus musculus GN=Atp6v0d1 PE=1 SV=2	64 % (1)	NA	Atp6v0d1	2
P54116	Erythrocyte band 7 integral membrane protein OS=Mus musculus GN=Stom PE=1 SV=3	100 % (2)	NA	Stom	2
P55258 (+9)	Ras-related protein Rab-8A OS=Mus musculus GN=Rab8a PE=1 SV=2	100 % (2)	NA	Rab8a	2
P56399 (+1)	Ubiquitin carboxyl-terminal hydrolase 5 OS=Mus musculus GN=Usp5 PE=1 SV=1	100 % (3)		Usp5	2
P56480	ATP synthase subunit beta, mitochondrial OS=Mus musculus GN=Atp5b PE=1 SV=2	100 % (2)	NA	Atp5b	2
P61089	Ubiquitin-conjugating enzyme E2 N OS=Mus musculus GN=Ube2n PE=1 SV=1	100 % (2)		Ube2n	2
P61255	60S ribosomal protein L26 OS=Mus musculus GN=Rpl26 PE=2 SV=1	100 % (6)	NA	Rpl26	2
P61620	Protein transport protein Sec61 subunit alpha isoform 1 OS=Mus musculus GN=Sec61a1 PE=2 SV=2	100 % (2)	NA	Sec61a1	2
P61804	Dolichyl-diphosphooligosaccharide--protein glycosyltransferase subunit DAD1 OS=Mus musculus GN=Dad1 PE=2 SV=3	100 % (2)	NA	Dad1	2
P62242	40S ribosomal protein S8 OS=Mus musculus GN=Rps8 PE=1 SV=2	100 % (3)	NA	Rps8	2
P62267	40S ribosomal protein S23 OS=Mus musculus GN=Rps23 PE=2 SV=3	100 % (5)	NA	Rps23	2
P62806	Histone H4 OS=Mus musculus GN=Hist1h4a PE=1 SV=2	100 % (4)	NA	Hist1h4a	2
P62821 (+2)	Ras-related protein Rab-1A OS=Mus musculus GN=Rab1A PE=1 SV=3	100 % (3)	NA	Rab1A	2
P62852	40S ribosomal protein S25 OS=Mus musculus GN=Rps25 PE=2 SV=1	100 % (4)	NA	Rps25	2
P62874	Guanine nucleotide-binding protein G(I)/G(S)/G(T) subunit beta-1 OS=Mus musculus GN=Gnb1 PE=1 SV=3	100 % (4)	NA	Gnb1	2
P63001 (+1)	Ras-related C3 botulinum toxin substrate 1 OS=Mus musculus GN=Rac1 PE=1 SV=1	100 % (5)	NA	Rac1	2
P63158	High mobility group protein B1 OS=Mus musculus GN=Hmgb1 PE=1 SV=2	100 % (3)		Hmgb1	2
P63323 (+1)	40S ribosomal protein S12 OS=Mus musculus GN=Rps12 PE=1 SV=2	88 % (1)	NA	Rps12	2
P67778	Prohibitin OS=Mus musculus GN=Phb PE=1 SV=1	100 % (3)	NA	Phb	2
P84089	Enhancer of rudimentary homolog OS=Mus musculus GN=Erh PE=1 SV=1	100 % (2)	NA	Erh	2
Q02248	Catenin beta-1 OS=Mus musculus GN=Ctnnb1 PE=1 SV=1	100 % (3)	NA	Ctnnb1	2
Q03265 (+1)	ATP synthase subunit alpha, mitochondrial OS=Mus musculus GN=Atp5a1 PE=1 SV=1	100 % (5)	NA	Atp5a1	2
Q04736	Tyrosine-protein kinase Yes OS=Mus musculus GN=Yes1 PE=1 SV=3	100 % (3)	NA	Yes1	2
Q20BD0 (+2)	Heterogeneous nuclear ribonucleoprotein A/B OS=Mus musculus GN=Hnrnpab PE=2 SV=1	64 % (1)	NA	Hnrnpab	2
Q3TKD0 (+2)	Transportin-1 (Fragment) OS=Mus musculus GN=Tnpo1 PE=2 SV=1	100 % (2)	NA	Tnpo1	2
Q3UPH7 (+3)	Rho guanine nucleotide exchange factor 40 OS=Mus musculus GN=Arhgef40 PE=2 SV=1	100 % (2)	NA	Arhgef40	2
Q3UPL0 (+1)	Protein transport protein Sec31A OS=Mus musculus GN=Sec31a PE=1 SV=2	100 % (4)	NA	Sec31a	2
Q45VK5 (+3)	Interleukin enhancer-binding factor 3 OS=Mus musculus GN=Ilf3 PE=2 SV=1	50 % (1)	NA	Ilf3	2
Q52L67	Gpsn2 protein OS=Mus musculus GN=Tecr PE=2 SV=1	100 % (3)	NA	Tecr	2
Q5SQX6 (+3)	Cytoplasmic FMR1-interacting protein 2 OS=Mus musculus GN=Cyfip2 PE=1 SV=2	100 % (2)	NA	Cyfip2	2
Q5SUH6 (+3)	Clathrin interactor 1 OS=Mus musculus GN=Clint1 PE=2 SV=1	100 % (2)	NA	Clint1	2
Q60692	Proteasome subunit beta type-6 OS=Mus musculus GN=Psmb6 PE=1 SV=3	91 % (1)	NA	Psmb6	2
Q60865	Caprin-1 OS=Mus musculus GN=Caprin1 PE=1 SV=2	100 % (2)	NA	Caprin1	2
Q60932-2 (+1)	Isoform Mt-VDAC1 of Voltage-dependent anion-selective channel protein 1 OS=Mus musculus GN=Vdac1	100 % (4)	NA	Vdac1	2
Q61595-16 (+7)	Isoform 16 of Kinectin OS=Mus musculus GN=Ktn1	39 % (0)	NA	Ktn1	2
Q61656 (+1)	Probable ATP-dependent RNA helicase DDX5 OS=Mus musculus GN=Ddx5 PE=1 SV=2	100 % (7)	NA	Ddx5	2
Q61699 (+1)	Heat shock protein 105 kDa OS=Mus musculus GN=Hsph1 PE=1 SV=2	100 % (8)	NA	Hsph1	2
Q62009 (+3)	Periostin OS=Mus musculus GN=Postn PE=1 SV=2	100 % (1)	NA	Postn	2
Q62167	ATP-dependent RNA helicase DDX3X OS=Mus musculus GN=Ddx3x PE=1 SV=3	100 % (6)	NA	Ddx3x	2
Q62446	Peptidyl-prolyl cis-trans isomerase FKBP3 OS=Mus musculus GN=Fkbp3 PE=1 SV=2	100 % (2)	NA	Fkbp3	2
Q64364	Cyclin-dependent kinase inhibitor 2A, isoform 3 OS=Mus musculus GN=Cdkn2a PE=1 SV=1	91 % (1)	NA	Cdkn2a	2
Q6A0A9	Constitutive coactivator of PPAR-gamma-like protein 1 OS=Mus musculus GN=FAM120A PE=1 SV=2	100 % (3)	NA	FAM120A	2
Q6NSP9	High mobility group protein HMGI-C OS=Mus musculus GN=Hmga2 PE=2 SV=1	100 % (3)	NA	Hmga2	2
Q6P5B5	Fragile X mental retardation syndrome-related protein 2 OS=Mus musculus GN=Fxr2 PE=2 SV=1	100 % (2)	NA	Fxr2	2
Q6P5D8	Structural maintenance of chromosomes flexible hinge domain-containing protein 1 OS=Mus musculus GN=Smchd1 PE=2 SV=2	91 % (1)	NA	Smchd1	2
Q6PHQ9 (+1)	MCG5546, isoform CRA_c OS=Mus musculus GN=Pabpc4 PE=2 SV=1	100 % (2)	NA	Pabpc4	2
Q6R0H7-4 (+1)	Isoform XLas-4 of Guanine nucleotide-binding protein G(s) subunit alpha isoforms XLas OS=Mus musculus GN=Gnas	100 % (2)	NA	Gnas	2
Q6ZWZ7 (+1)	60S ribosomal protein L17 OS=Mus musculus GN=Rpl17 PE=2 SV=1	100 % (2)	NA	Rpl17	2
Q7TMS5 (+1)	ATP-binding cassette sub-family G member 2 OS=Mus musculus GN=Abcg2 PE=2 SV=1	100 % (2)	NA	Abcg2	2
Q7TQH0-2 (+4)	Isoform 2 of Ataxin-2-like protein OS=Mus musculus GN=Atxn2l	50 % (1)	NA	Atxn2l	2
Q80SZ7	Guanine nucleotide-binding protein G(I)/G(S)/G(O) subunit gamma-5 OS=Mus musculus GN=Gng5 PE=2 SV=2	100 % (2)	NA	Gng5	2
Q8BG95	Protein phosphatase 1 regulatory subunit 12B OS=Mus musculus GN=Ppp1r12b PE=1 SV=2	100 % (5)	NA	Ppp1r12b	2
Q8BGU5 (+1)	Cyclin-Y OS=Mus musculus GN=Ccny PE=1 SV=1	100 % (2)	NA	Ccny	2
Q8BJF9	Charged multivesicular body protein 2b OS=Mus musculus GN=Chmp2b PE=2 SV=1	100 % (2)	NA	Chmp2b	2
Q8BMJ2	Leucine--tRNA ligase, cytoplasmic OS=Mus musculus GN=Lars PE=2 SV=2	100 % (4)	NA	Lars	2
Q8C2Q3	RNA-binding protein 14 OS=Mus musculus GN=Rbm14 PE=1 SV=1	100 % (3)	NA	Rbm14	2
Q8C8U0 (+2)	Liprin-beta-1 OS=Mus musculus GN=Ppfibp1 PE=1 SV=3	100 % (2)	NA	Ppfibp1	2
Q8K411 (+2)	Presequence protease, mitochondrial OS=Mus musculus GN=Pitrm1 PE=2 SV=1	50 % (1)	NA	Pitrm1	2
Q8R050 (+1)	Eukaryotic peptide chain release factor GTP-binding subunit ERF3A OS=Mus musculus GN=Gspt1 PE=1 SV=2	100 % (3)	NA	Gspt1	2
Q8R2Q8	Bone marrow stromal antigen 2 OS=Mus musculus GN=Bst2 PE=1 SV=1	100 % (4)	NA	Bst2	2
Q8R4U7	Leucine zipper protein 1 OS=Mus musculus GN=Luzp1 PE=1 SV=2	100 % (9)	NA	Luzp1	2
Q8VDN2	Sodium/potassium-transporting ATPase subunit alpha-1 OS=Mus musculus GN=Atp1a1 PE=1 SV=1	100 % (2)	NA	Atp1a1	2
Q8VHN7 (+1)	G-protein coupled receptor 98 OS=Mus musculus GN=Gpr98 PE=2 SV=1	56 % (1)	NA	Gpr98	2
Q91W53 (+1)	Golgin subfamily A member 7 OS=Mus musculus GN=Golga7 PE=2 SV=1	100 % (4)	NA	Golga7	2
Q91WK2	Eukaryotic translation initiation factor 3 subunit H OS=Mus musculus GN=Eif3h PE=1 SV=1	64 % (1)		Eif3h	2
Q91ZW3	SWI/SNF-related matrix-associated actin-dependent regulator of chromatin subfamily A member 5 OS=Mus musculus GN=Smarca5 PE=1 SV=1	50 % (1)	NA	Smarca5	2
Q922D8	C-1-tetrahydrofolate synthase, cytoplasmic OS=Mus musculus GN=Mthfd1 PE=1 SV=4	100 % (2)	NA	Mthfd1	2
Q99JY8	Lipid phosphate phosphohydrolase 3 OS=Mus musculus GN=Ppap2b PE=1 SV=1	100 % (6)	NA	Ppap2b	2
Q99K85	Phosphoserine aminotransferase OS=Mus musculus GN=Psat1 PE=1 SV=1	64 % (1)	NA	Psat1	2
Q99KI0	Aconitate hydratase, mitochondrial OS=Mus musculus GN=Aco2 PE=1 SV=1	50 % (1)		Aco2	2
Q9CQD4	Charged multivesicular body protein 1b-2 OS=Mus musculus GN=Chmp1b2 PE=2 SV=2	100 % (2)	NA	Chmp1b2	2
Q9CR62	Mitochondrial 2-oxoglutarate/malate carrier protein OS=Mus musculus GN=Slc25a11 PE=1 SV=3	100 % (3)	NA	Slc25a11	2
Q9CXW3	Calcyclin-binding protein OS=Mus musculus GN=Cacybp PE=1 SV=1	100 % (2)	NA	Cacybp	2
Q9D4H4 (+1)	Angiomotin-like protein 1 OS=Mus musculus GN=Amotl1 PE=1 SV=2	100 % (2)	NA	Amotl1	2
Q9D8N0	Elongation factor 1-gamma OS=Mus musculus GN=Eef1g PE=1 SV=3	100 % (5)	NA	Eef1g	2
Q9DAW9	Calponin-3 OS=Mus musculus GN=Cnn3 PE=2 SV=1	99 % (1)	NA	Cnn3	2
Q9DB05	Alpha-soluble NSF attachment protein OS=Mus musculus GN=Napa PE=1 SV=1	100 % (3)		Napa	2
Q9DC51	Guanine nucleotide-binding protein G(k) subunit alpha OS=Mus musculus GN=Gnai3 PE=1 SV=3	100 % (4)	NA	Gnai3	2
Q9EPU0 (+1)	Regulator of nonsense transcripts 1 OS=Mus musculus GN=Upf1 PE=1 SV=2	100 % (4)	NA	Upf1	2
Q9EQH3	Vacuolar protein sorting-associated protein 35 OS=Mus musculus GN=Vps35 PE=1 SV=1	50 % (1)	NA	Vps35	2
Q9ESJ4	NCK-interacting protein with SH3 domain OS=Mus musculus GN=Nckipsd PE=2 SV=2	100 % (2)	NA	Nckipsd	2
Q9JHF5	A3 subunit of vacuolar-adenosine triphosphatase OS=Mus musculus GN=Tcirg1 PE=2 SV=1	50 % (1)	NA	Tcirg1	2
Q9JIW9	Ras-related protein Ral-B OS=Mus musculus GN=Ralb PE=2 SV=1	100 % (2)	NA	Ralb	2
Q9QYB1	Chloride intracellular channel protein 4 OS=Mus musculus GN=Clic4 PE=1 SV=3	100 % (2)	NA	Clic4	2
Q9QYC0 (+4)	Alpha-adducin OS=Mus musculus GN=Add1 PE=1 SV=2	100 % (2)	NA	Add1	2
Q9R0Q6	Actin-related protein 2/3 complex subunit 1A OS=Mus musculus GN=Arpc1a PE=1 SV=1	100 % (2)	NA	Arpc1a	2
Q9R0Y5 (+1)	Adenylate kinase isoenzyme 1 OS=Mus musculus GN=Ak1 PE=1 SV=1	100 % (2)	NA	Ak1	2
Q9WVC3	Caveolin-2 OS=Mus musculus GN=Cav2 PE=1 SV=1	100 % (2)	NA	Cav2	2
Q9Z0P4	Paralemmin-1 OS=Mus musculus GN=Palm PE=1 SV=1	100 % (8)	NA	Palm	2
Q9Z1Q5	Chloride intracellular channel protein 1 OS=Mus musculus GN=Clic1 PE=1 SV=3	100 % (4)		Clic1	2
A2A5R8 (+2)	Double-stranded RNA-binding protein Staufen homolog 1 OS=Mus musculus GN=Stau1 PE=4 SV=1		100 % (1)	Stau1	1
A2AFQ0 (+2)	E3 ubiquitin-protein ligase HUWE1 OS=Mus musculus GN=Huwe1 PE=4 SV=1		0 % (0)	Huwe1	1
D3Z614 (+2)	Zinc finger protein 30 OS=Mus musculus GN=Zfp30 PE=4 SV=1		0 % (0)	Zfp30	1
E9Q555 (+1)	E3 ubiquitin-protein ligase RNF213 OS=Mus musculus GN=Rnf213 PE=2 SV=1		50 % (0)	Rnf213	1
G5E866 (+1)	Splicing factor 3B subunit 1 OS=Mus musculus GN=Sf3b1 PE=4 SV=1		50 % (0)	Sf3b1	1
O35286	Putative pre-mRNA-splicing factor ATP-dependent RNA helicase DHX15 OS=Mus musculus GN=Dhx15 PE=2 SV=2		50 % (1)	Dhx15	1
O35295	Transcriptional activator protein Pur-beta OS=Mus musculus GN=Purb PE=1 SV=3		100 % (1)	Purb	1
O35639	Annexin A3 OS=Mus musculus GN=Anxa3 PE=1 SV=4		0 % (0)	Anxa3	1
P14685	26S proteasome non-ATPase regulatory subunit 3 OS=Mus musculus GN=Psmd3 PE=1 SV=3		74 % (1)	Psmd3	1
P19096	Fatty acid synthase OS=Mus musculus GN=Fasn PE=1 SV=2		0 % (0)	Fasn	1
P27659	60S ribosomal protein L3 OS=Mus musculus GN=Rpl3 PE=2 SV=3		100 % (1)	Rpl3	1
P31230 (+1)	Aminoacyl tRNA synthase complex-interacting multifunctional protein 1 OS=Mus musculus GN=Aimp1 PE=1 SV=2		100 % (2)	Aimp1	1
P51174	Long-chain specific acyl-CoA dehydrogenase, mitochondrial OS=Mus musculus GN=Acadl PE=2 SV=2		0 % (0)	Acadl	1
P57784	U2 small nuclear ribonucleoprotein A' OS=Mus musculus GN=Snrpa1 PE=1 SV=2		73 % (1)	Snrpa1	1
P62334	26S protease regulatory subunit 10B OS=Mus musculus GN=Psmc6 PE=1 SV=1		0 % (0)	Psmc6	1
Q00PI9	Heterogeneous nuclear ribonucleoprotein U-like protein 2 OS=Mus musculus GN=Hnrnpul2 PE=1 SV=2		0 % (0)	Hnrnpul2	1
Q05186	Reticulocalbin-1 OS=Mus musculus GN=Rcn1 PE=1 SV=1		100 % (3)	Rcn1	1
Q7TPV4	Myb-binding protein 1A OS=Mus musculus GN=Mybbp1a PE=1 SV=2		100 % (2)	Mybbp1a	1
Q9CXY6	Interleukin enhancer-binding factor 2 OS=Mus musculus GN=Ilf2 PE=1 SV=1		100 % (3)	Ilf2	1
Q9ERU9	E3 SUMO-protein ligase RanBP2 OS=Mus musculus GN=Ranbp2 PE=1 SV=2		0 % (0)	Ranbp2	1
A2A547 (+1)	Ribosomal protein L19 OS=Mus musculus GN=Rpl19 PE=3 SV=1	NA	100 % (2)	Rpl19	1
A2A6G9 (+2)	LIM and SH3 domain protein 1 (Fragment) OS=Mus musculus GN=Lasp1 PE=4 SV=1	NA	59 % (0)	Lasp1	1
A2A7S7 (+1)	Tyrosine--tRNA ligase, cytoplasmic OS=Mus musculus GN=Yars PE=4 SV=1	NA	74 % (0)	Yars	1
A2A930 (+6)	PR domain containing 16 OS=Mus musculus GN=Prdm16 PE=4 SV=1	NA	0 % (0)	Prdm16	1
A2AE89 (+2)	Glutathione S-transferase Mu 1 (Fragment) OS=Mus musculus GN=Gstm1 PE=3 SV=1	NA	0 % (0)	Gstm1	1
A2AFQ2 (+1)	3-hydroxyacyl-CoA dehydrogenase type-2 OS=Mus musculus GN=Hsd17b10 PE=3 SV=1	NA	0 % (0)	Hsd17b10	1
A2AGN7 (+2)	26S protease regulatory subunit 6A OS=Mus musculus GN=Psmc3 PE=3 SV=1	NA	74 % (1)	Psmc3	1
A2AJI0-2 (+3)	Isoform 2 of MAP7 domain-containing protein 1 OS=Mus musculus GN=Map7d1	NA	100 % (0)	Map7d1	1
A2AL12 (+1)	Heterogeneous nuclear ribonucleoprotein A3 OS=Mus musculus GN=Hnrnpa3 PE=4 SV=1	NA	100 % (2)	Hnrnpa3	1
A2AN08 (+2)	E3 ubiquitin-protein ligase UBR4 OS=Mus musculus GN=Ubr4 PE=1 SV=1	NA	100 % (1)	Ubr4	1
A2AQE9 (+4)	Activating transcription factor 2 (Fragment) OS=Mus musculus GN=Atf2 PE=4 SV=1	NA	99 % (1)	Atf2	1
A2ASS6	Titin OS=Mus musculus GN=Ttn PE=1 SV=1	NA	100 % (1)	Ttn	1
A2ATP5 (+3)	Myelin basic protein expression factor 2, repressor OS=Mus musculus GN=Myef2 PE=4 SV=1	NA	100 % (2)	Myef2	1
A3KG93 (+1)	Amine oxidase (Flavin containing) domain 2 OS=Mus musculus GN=Kdm1a PE=4 SV=1	NA	100 % (13)	Kdm1a	1
A7M7S6 (+3)	Hemoglobin X, alpha-like embryonic chain in Hba complex (Fragment) OS=Mus musculus GN=Hba-x PE=3 SV=1	NA	80 % (1)	Hba-x	1
B1AR17	Chromodomain helicase DNA binding protein 3 OS=Mus musculus GN=Chd3 PE=4 SV=1	NA	100 % (16)	Chd3	1
B1AWD8 (+5)	Clathrin light chain A OS=Mus musculus GN=Clta PE=4 SV=1	NA	73 % (0)	Clta	1
B1AXW5 (+2)	Peroxiredoxin 1 (Fragment) OS=Mus musculus GN=Prdx1 PE=4 SV=1	NA	100 % (1)	Prdx1	1
B1AXZ0 (+7)	ELAV (Embryonic lethal, abnormal vision, Drosophila)-like 2 (Hu antigen B) OS=Mus musculus GN=Elavl2 PE=4 SV=1	NA	73 % (1)	Elavl2	1
B1AYJ9 (+2)	Obg-like ATPase 1 OS=Mus musculus GN=Ola1 PE=4 SV=1	NA	50 % (0)	Ola1	1
B2RQC6 (+3)	Carbamoyl-phosphate synthetase 2, aspartate transcarbamylase, and dihydroorotase OS=Mus musculus GN=Cad PE=2 SV=1	NA	100 % (2)	Cad	1
B2RXW8	Ppfia1 protein OS=Mus musculus GN=Ppfia1 PE=2 SV=1	NA	7 % (0)	Ppfia1	1
B4YB46 (+6)	Dlk1 OS=Mus musculus GN=Dlk1 PE=2 SV=1	NA	100 % (1)	Dlk1	1
B7FAU5 (+3)	Emerin OS=Mus musculus GN=Emd PE=4 SV=1	NA	100 % (2)	Emd	1
D3YUE2 (+1)	Procollagen C-endopeptidase enhancer 1 OS=Mus musculus GN=Pcolce PE=4 SV=1	NA	100 % (4)	Pcolce	1
D3YUX2 (+4)	Multiple PDZ domain protein OS=Mus musculus GN=Mpdz PE=4 SV=1	NA	100 % (2)	Mpdz	1
D3YVL0 (+2)	Putative helicase MOV-10 OS=Mus musculus GN=Mov10 PE=4 SV=1	NA	0 % (0)	Mov10	1
D3YVM2 (+1)	Transmembrane protein 59 OS=Mus musculus GN=Tmem59 PE=4 SV=1	NA	80 % (1)	Tmem59	1
D3YVN7 (+2)	Elongation factor Tu OS=Mus musculus GN=Gm9755 PE=3 SV=1	NA	0 % (0)	Gm9755	1
D3YW41 (+2)	60S ribosomal protein L36 OS=Mus musculus GN=Rpl36-ps3 PE=3 SV=1	NA	100 % (0)	Rpl36-ps3	1
D3YWT3 (+26)	Transcription factor 7-like 2 OS=Mus musculus GN=Tcf7l2 PE=4 SV=1	NA	74 % (1)	Tcf7l2	1
D3YXT4 (+2)	Uncharacterized protein OS=Mus musculus GN=Gm5619 PE=4 SV=1	NA	100 % (10)	Gm5619	1
D3YZ00 (+5)	Nuclear factor 1 (Fragment) OS=Mus musculus GN=Nfix PE=3 SV=1	NA	100 % (3)	Nfix	1
D3Z0H4 (+4)	Ribosomal protein L15 OS=Mus musculus GN=Gm5292 PE=3 SV=1	NA	73 % (0)	Gm5292	1
D3Z0Y2 (+3)	Peroxiredoxin-6 OS=Mus musculus GN=Prdx6 PE=4 SV=1	NA	0 % (0)	Prdx6	1
D3Z1N9 (+2)	MCG9889 OS=Mus musculus GN=Gm10709 PE=4 SV=1	NA	73 % (1)	Gm10709	1
D3Z7M6 (+21)	cAMP-responsive element modulator OS=Mus musculus GN=Crem PE=4 SV=1	NA	80 % (1)	Crem	1
D3Z7W0 (+1)	Iron-sulfur cluster assembly enzyme ISCU, mitochondrial OS=Mus musculus GN=Iscu PE=4 SV=1	NA	100 % (0)	Iscu	1
E0CY45 (+13)	Runt-related transcription factor 2 OS=Mus musculus GN=Runx2 PE=4 SV=1	NA	100 % (2)	Runx2	1
E9PVA8	Protein Gcn1l1 OS=Mus musculus GN=Gcn1l1 PE=4 SV=1	NA	7 % (0)	Gcn1l1	1
E9PVS2 (+7)	Transcriptional enhancer factor TEF-1 OS=Mus musculus GN=Tead1 PE=4 SV=1	NA	74 % (1)	Tead1	1
E9PVX6	Protein Mki67 OS=Mus musculus GN=Mki67 PE=4 SV=1	NA	80 % (1)	Mki67	1
E9PX23-R (+8)	Metastasis-associated protein MTA1 OS=Mus musculus GN=Mta1 PE=4 SV=1	NA	74 % (1)	Mta1	1
E9PYB0	Protein Ahnak2 (Fragment) OS=Mus musculus GN=Ahnak2 PE=4 SV=1	NA	50 % (0)	Ahnak2	1
E9PYH0	Versican core protein OS=Mus musculus GN=Vcan PE=4 SV=1	NA	100 % (0)	Vcan	1
E9PZ16	Basement membrane-specific heparan sulfate proteoglycan core protein OS=Mus musculus GN=Hspg2 PE=4 SV=1	NA	100 % (2)	Hspg2	1
E9PZF0	Nucleoside diphosphate kinase OS=Mus musculus GN=Gm20390 PE=3 SV=1	NA	100 % (3)	Gm20390	1
E9Q133 (+2)	T-complex protein 1 subunit gamma OS=Mus musculus GN=Cct3 PE=3 SV=1	NA	74 % (1)	Cct3	1
E9Q360 (+2)	Integrator complex subunit 10 OS=Mus musculus GN=Ints10 PE=4 SV=1	NA	100 % (1)	Ints10	1
E9Q390	Myoferlin OS=Mus musculus GN=Myof PE=4 SV=2	NA	0 % (0)	Myof	1
E9Q4K7	Protein Kif13b OS=Mus musculus GN=Kif13b PE=3 SV=1	NA	16 % (0)	Kif13b	1
E9Q5A7	Zinc finger homeobox protein 4 OS=Mus musculus GN=Zfhx4 PE=3 SV=1	NA	100 % (33)	Zfhx4	1
E9Q5G3-R	Protein Kif23 OS=Mus musculus GN=Kif23 PE=3 SV=1	NA	0 % (0)	Kif23	1
E9Q9M8 (+1)	Protein Pwwp2b OS=Mus musculus GN=Pwwp2b PE=4 SV=1	NA	100 % (2)	Pwwp2b	1
E9QMD3	Zinc finger homeobox protein 3 OS=Mus musculus GN=Zfhx3 PE=3 SV=1	NA	100 % (17)	Zfhx3	1
E9QN31	Putative ribosomal RNA methyltransferase NOP2 OS=Mus musculus GN=Nop2 PE=4 SV=1	NA	99 % (0)	Nop2	1
E9QN70 (+1)	Laminin subunit beta-1 OS=Mus musculus GN=Lamb1 PE=4 SV=1	NA	100 % (1)	Lamb1	1
E9QNN1	ATP-dependent RNA helicase A OS=Mus musculus GN=Dhx9 PE=4 SV=1	NA	100 % (1)	Dhx9	1
F2Z4B3	Cyclin-dependent kinase 2-associated protein 1 OS=Mus musculus GN=Cdk2ap1 PE=4 SV=1	NA	100 % (3)	Cdk2ap1	1
F8VQC7	Kinectin OS=Mus musculus GN=Ktn1 PE=4 SV=1	NA	100 % (3)	Ktn1	1
F8WHL2 (+1)	Coatomer subunit alpha OS=Mus musculus GN=Copa PE=4 SV=1	NA	50 % (0)	Copa	1
F8WIB1 (+2)	ADP-ribosylation factor-like protein 1 (Fragment) OS=Mus musculus GN=Arl1 PE=3 SV=1	NA	80 % (0)	Arl1	1
F8WIT2 (+1)	Annexin OS=Mus musculus GN=Anxa6 PE=3 SV=1	NA	0 % (0)	Anxa6	1
G3UW90 (+1)	Trichorhinophalangeal syndrome I (Human), isoform CRA_b OS=Mus musculus GN=Trps1 PE=4 SV=1	NA	100 % (1)	Trps1	1
G3UWE1 (+2)	MCG11048, isoform CRA_c OS=Mus musculus GN=Tecr PE=4 SV=1	NA	100 % (2)	Tecr	1
G3UWG2-R (+1)	T-cell lymphoma invasion and metastasis 1 OS=Mus musculus GN=Tiam1 PE=4 SV=1	NA	74 % (1)	Tiam1	1
G3UWX1 (+5)	Replication factor C subunit 1 OS=Mus musculus GN=Rfc1 PE=4 SV=1	NA	50 % (0)	Rfc1	1
G3UX26 (+1)	Voltage-dependent anion-selective channel protein 2 (Fragment) OS=Mus musculus GN=Vdac2 PE=4 SV=1	NA	0 % (0)	Vdac2	1
G3UXG7 (+1)	Casein kinase II subunit beta OS=Mus musculus GN=Csnk2b PE=4 SV=1	NA	73 % (1)	Csnk2b	1
G3UZ44 (+2)	Paired mesoderm homeobox protein 1 OS=Mus musculus GN=Prrx1 PE=3 SV=1	NA	0 % (0)	Prrx1	1
G3UZT5 (+1)	Ecotropic viral integration site 1, isoform CRA_d OS=Mus musculus GN=Mecom PE=4 SV=1	NA	100 % (1)	Mecom	1
G3X956 (+1)	FACT complex subunit SPT16 OS=Mus musculus GN=Supt16h PE=4 SV=1	NA	100 % (4)	Supt16h	1
G5E839 (+1)	T-complex protein 1 subunit delta OS=Mus musculus GN=Cct4 PE=3 SV=1	NA	100 % (2)	Cct4	1
G5E8N5 (+1)	L-lactate dehydrogenase OS=Mus musculus GN=Ldha PE=3 SV=1	NA	100 % (3)	Ldha	1
H3BJ40 (+7)	Rho guanine nucleotide exchange factor 2 OS=Mus musculus GN=Arhgef2 PE=4 SV=1	NA	50 % (0)	Arhgef2	1
H7BX26 (+1)	Centrosomal protein of 170 kDa OS=Mus musculus GN=Cep170 PE=4 SV=1	NA	100 % (1)	Cep170	1
H9H9S3 (+1)	Zinc finger E-box-binding homeobox 2 OS=Mus musculus GN=Zeb2 PE=4 SV=1	NA	100 % (2)	Zeb2	1
J3QK72 (+2)	Uncharacterized protein OS=Mus musculus GN=Gm7729 PE=4 SV=1	NA	100 % (7)	Gm7729	1
J3QNB1 (+1)	La-related protein 1 OS=Mus musculus GN=Larp1 PE=4 SV=1	NA	100 % (0)	Larp1	1
J3QNL8 (+3)	Pre-mRNA-processing factor 19 OS=Mus musculus GN=Prpf19 PE=4 SV=1	NA	100 % (2)	Prpf19	1
J3QPE8 (+2)	MCG16555 OS=Mus musculus GN=Vdac3-ps1 PE=4 SV=1	NA	0 % (0)	Vdac3-ps1	1
K3W4P9 (+1)	REST corepressor 1 OS=Mus musculus GN=Rcor1 PE=4 SV=1	NA	100 % (7)	Rcor1	1
O08553	Dihydropyrimidinase-related protein 2 OS=Mus musculus GN=Dpysl2 PE=1 SV=2	NA	0 % (0)	Dpysl2	1
O08992 (+1)	Syntenin-1 OS=Mus musculus GN=Sdcbp PE=2 SV=1	NA	100 % (1)	Sdcbp	1
O35326 (+1)	Serine/arginine-rich splicing factor 5 OS=Mus musculus GN=Srsf5 PE=1 SV=2	NA	73 % (0)	Srsf5	1
O35344	Importin subunit alpha-3 OS=Mus musculus GN=Kpna3 PE=1 SV=1	NA	100 % (7)	Kpna3	1
O35345 (+1)	Importin subunit alpha-7 OS=Mus musculus GN=Kpna6 PE=1 SV=2	NA	100 % (3)	Kpna6	1
O35643 (+2)	AP-1 complex subunit beta-1 OS=Mus musculus GN=Ap1b1 PE=1 SV=2	NA	0 % (0)	Ap1b1	1
O35737 (+1)	Heterogeneous nuclear ribonucleoprotein H OS=Mus musculus GN=Hnrnph1 PE=1 SV=3	NA	100 % (2)	Hnrnph1	1
O35864	COP9 signalosome complex subunit 5 OS=Mus musculus GN=Cops5 PE=1 SV=3	NA	0 % (0)	Cops5	1
O35887	Calumenin OS=Mus musculus GN=Calu PE=1 SV=1	NA	100 % (6)	Calu	1
O54734	Dolichyl-diphosphooligosaccharide--protein glycosyltransferase 48 kDa subunit OS=Mus musculus GN=Ddost PE=1 SV=2	NA	100 % (2)	Ddost	1
O55135	Eukaryotic translation initiation factor 6 OS=Mus musculus GN=Eif6 PE=1 SV=2	NA	99 % (1)	Eif6	1
O70394-R	Interleukin-27 receptor subunit alpha OS=Mus musculus GN=Il27ra PE=2 SV=2	NA	0 % (0)	Il27ra	1
O70456	14-3-3 protein sigma OS=Mus musculus GN=Sfn PE=1 SV=2	NA	73 % (0)	Sfn	1
O70475	UDP-glucose 6-dehydrogenase OS=Mus musculus GN=Ugdh PE=1 SV=1	NA	0 % (0)	Ugdh	1
O88207	Collagen alpha-1(V) chain OS=Mus musculus GN=Col5a1 PE=2 SV=2	NA	100 % (3)	Col5a1	1
O88477	Insulin-like growth factor 2 mRNA-binding protein 1 OS=Mus musculus GN=Igf2bp1 PE=1 SV=1	NA	100 % (1)	Igf2bp1	1
O88569 (+2)	Heterogeneous nuclear ribonucleoproteins A2/B1 OS=Mus musculus GN=Hnrnpa2b1 PE=1 SV=2	NA	100 % (2)	Hnrnpa2b1	1
O88712	C-terminal-binding protein 1 OS=Mus musculus GN=Ctbp1 PE=1 SV=2	NA	100 % (12)	Ctbp1	1
O88844	Isocitrate dehydrogenase [NADP] cytoplasmic OS=Mus musculus GN=Idh1 PE=1 SV=2	NA	0 % (0)	Idh1	1
O89051	Integral membrane protein 2B OS=Mus musculus GN=Itm2b PE=2 SV=1	NA	100 % (2)	Itm2b	1
P00687 (+4)	Alpha-amylase 1 OS=Mus musculus GN=Amy1 PE=1 SV=2	NA	0 % (0)	Amy1	1
P01029	Complement C4-B OS=Mus musculus GN=C4b PE=1 SV=3	NA	74 % (0)	C4b	1
P05132 (+1)	cAMP-dependent protein kinase catalytic subunit alpha OS=Mus musculus GN=Prkaca PE=1 SV=3	NA	74 % (1)	Prkaca	1
P05202	Aspartate aminotransferase, mitochondrial OS=Mus musculus GN=Got2 PE=1 SV=1	NA	74 % (1)	Got2	1
P07091	Protein S100-A4 OS=Mus musculus GN=S100a4 PE=1 SV=1	NA	100 % (1)	S100a4	1
P07901	Heat shock protein HSP 90-alpha OS=Mus musculus GN=Hsp90aa1 PE=1 SV=4	NA	100 % (0)	Hsp90aa1	1
P08113	Endoplasmin OS=Mus musculus GN=Hsp90b1 PE=1 SV=2	NA	100 % (2)	Hsp90b1	1
P08122	Collagen alpha-2(IV) chain OS=Mus musculus GN=Col4a2 PE=2 SV=4	NA	100 % (1)	Col4a2	1
P08207	Protein S100-A10 OS=Mus musculus GN=S100a10 PE=2 SV=2	NA	80 % (1)	S100a10	1
P08228	Superoxide dismutase [Cu-Zn] OS=Mus musculus GN=Sod1 PE=1 SV=2	NA	80 % (1)	Sod1	1
P08249	Malate dehydrogenase, mitochondrial OS=Mus musculus GN=Mdh2 PE=1 SV=3	NA	100 % (1)	Mdh2	1
P09411	Phosphoglycerate kinase 1 OS=Mus musculus GN=Pgk1 PE=1 SV=4	NA	100 % (0)	Pgk1	1
P09528	Ferritin heavy chain OS=Mus musculus GN=Fth1 PE=1 SV=2	NA	100 % (0)	Fth1	1
P10107	Annexin A1 OS=Mus musculus GN=Anxa1 PE=1 SV=2	NA	100 % (3)	Anxa1	1
P14211	Calreticulin OS=Mus musculus GN=Calr PE=1 SV=1	NA	100 % (0)	Calr	1
P16045	Galectin-1 OS=Mus musculus GN=Lgals1 PE=1 SV=3	NA	100 % (1)	Lgals1	1
P16125	L-lactate dehydrogenase B chain OS=Mus musculus GN=Ldhb PE=1 SV=2	NA	0 % (0)	Ldhb	1
P16381 (+1)	Putative ATP-dependent RNA helicase Pl10 OS=Mus musculus GN=D1Pas1 PE=1 SV=1	NA	100 % (3)	D1Pas1	1
P16627	Heat shock 70 kDa protein 1-like OS=Mus musculus GN=Hspa1l PE=2 SV=4	NA	100 % (0)	Hspa1l	1
P17426 (+1)	AP-2 complex subunit alpha-1 OS=Mus musculus GN=Ap2a1 PE=1 SV=1	NA	50 % (1)	Ap2a1	1
P17751	Triosephosphate isomerase OS=Mus musculus GN=Tpi1 PE=1 SV=4	NA	100 % (2)	Tpi1	1
P18760 (+1)	Cofilin-1 OS=Mus musculus GN=Cfl1 PE=1 SV=3	NA	100 % (4)	Cfl1	1
P19001	Keratin, type I cytoskeletal 19 OS=Mus musculus GN=Krt19 PE=1 SV=1	NA	0 % (0)	Krt19	1
P19253	60S ribosomal protein L13a OS=Mus musculus GN=Rpl13a PE=1 SV=4	NA	100 % (1)	Rpl13a	1
P20108	Thioredoxin-dependent peroxide reductase, mitochondrial OS=Mus musculus GN=Prdx3 PE=1 SV=1	NA	0 % (0)	Prdx3	1
P23116	Eukaryotic translation initiation factor 3 subunit A OS=Mus musculus GN=Eif3a PE=1 SV=5	NA	50 % (1)	Eif3a	1
P24369	Peptidyl-prolyl cis-trans isomerase B OS=Mus musculus GN=Ppib PE=2 SV=2	NA	25 % (0)	Ppib	1
P24547	Inosine-5'-monophosphate dehydrogenase 2 OS=Mus musculus GN=Impdh2 PE=1 SV=2	NA	0 % (0)	Impdh2	1
P26039	Talin-1 OS=Mus musculus GN=Tln1 PE=1 SV=2	NA	50 % (0)	Tln1	1
P26040	Ezrin OS=Mus musculus GN=Ezr PE=1 SV=3	NA	50 % (0)	Ezr	1
P26043	Radixin OS=Mus musculus GN=Rdx PE=1 SV=3	NA	0 % (0)	Rdx	1
P26443	Glutamate dehydrogenase 1, mitochondrial OS=Mus musculus GN=Glud1 PE=1 SV=1	NA	0 % (0)	Glud1	1
P26516	26S proteasome non-ATPase regulatory subunit 7 OS=Mus musculus GN=Psmd7 PE=1 SV=2	NA	0 % (0)	Psmd7	1
P27046	Alpha-mannosidase 2 OS=Mus musculus GN=Man2a1 PE=1 SV=2	NA	0 % (0)	Man2a1	1
P27773	Protein disulfide-isomerase A3 OS=Mus musculus GN=Pdia3 PE=1 SV=2	NA	100 % (2)	Pdia3	1
P28665	Murinoglobulin-1 OS=Mus musculus GN=Mug1 PE=1 SV=3	NA	80 % (0)	Mug1	1
P29391 (+1)	Ferritin light chain 1 OS=Mus musculus GN=Ftl1 PE=1 SV=2	NA	100 % (4)	Ftl1	1
P34056 (+4)	Transcription factor AP-2-alpha OS=Mus musculus GN=Tfap2a PE=1 SV=2	NA	100 % (2)	Tfap2a	1
P35278 (+1)	Ras-related protein Rab-5C OS=Mus musculus GN=Rab5c PE=1 SV=2	NA	0 % (0)	Rab5c	1
P35564	Calnexin OS=Mus musculus GN=Canx PE=1 SV=1	NA	50 % (0)	Canx	1
P42669	Transcriptional activator protein Pur-alpha OS=Mus musculus GN=Pura PE=1 SV=1	NA	74 % (1)	Pura	1
P42932	T-complex protein 1 subunit theta OS=Mus musculus GN=Cct8 PE=1 SV=3	NA	100 % (2)	Cct8	1
P45952	Medium-chain specific acyl-CoA dehydrogenase, mitochondrial OS=Mus musculus GN=Acadm PE=1 SV=1	NA	0 % (0)	Acadm	1
P46061	Ran GTPase-activating protein 1 OS=Mus musculus GN=Rangap1 PE=1 SV=2	NA	0 % (0)	Rangap1	1
P46471 (+1)	26S protease regulatory subunit 7 OS=Mus musculus GN=Psmc2 PE=1 SV=5	NA	74 % (1)	Psmc2	1
P46935	E3 ubiquitin-protein ligase NEDD4 OS=Mus musculus GN=Nedd4 PE=1 SV=3	NA	100 % (1)	Nedd4	1
P47738	Aldehyde dehydrogenase, mitochondrial OS=Mus musculus GN=Aldh2 PE=1 SV=1	NA	0 % (0)	Aldh2	1
P47911	60S ribosomal protein L6 OS=Mus musculus GN=Rpl6 PE=1 SV=3	NA	100 % (7)	Rpl6	1
P47955	60S acidic ribosomal protein P1 OS=Mus musculus GN=Rplp1 PE=1 SV=1	NA	100 % (1)	Rplp1	1
P48036	Annexin A5 OS=Mus musculus GN=Anxa5 PE=1 SV=1	NA	100 % (3)	Anxa5	1
P48722-2 (+1)	Isoform 2 of Heat shock 70 kDa protein 4L OS=Mus musculus GN=Hspa4l	NA	50 % (0)	Hspa4l	1
P49722	Proteasome subunit alpha type-2 OS=Mus musculus GN=Psma2 PE=1 SV=3	NA	73 % (1)	Psma2	1
P50516 (+1)	V-type proton ATPase catalytic subunit A OS=Mus musculus GN=Atp6v1a PE=1 SV=2	NA	50 % (0)	Atp6v1a	1
P51660	Peroxisomal multifunctional enzyme type 2 OS=Mus musculus GN=Hsd17b4 PE=1 SV=3	NA	100 % (1)	Hsd17b4	1
P52293	Importin subunit alpha-2 OS=Mus musculus GN=Kpna2 PE=1 SV=2	NA	100 % (1)	Kpna2	1
P52927 (+1)	High mobility group protein HMGI-C OS=Mus musculus GN=Hmga2 PE=1 SV=1	NA	100 % (1)	Hmga2	1
P53564	Homeobox protein cut-like 1 OS=Mus musculus GN=Cux1 PE=1 SV=3	NA	100 % (23)	Cux1	1
P53690	Matrix metalloproteinase-14 OS=Mus musculus GN=Mmp14 PE=2 SV=3	NA	74 % (1)	Mmp14	1
P54071	Isocitrate dehydrogenase [NADP], mitochondrial OS=Mus musculus GN=Idh2 PE=1 SV=3	NA	74 % (0)	Idh2	1
P54775	26S protease regulatory subunit 6B OS=Mus musculus GN=Psmc4 PE=1 SV=2	NA	74 % (1)	Psmc4	1
P58252	Elongation factor 2 OS=Mus musculus GN=Eef2 PE=1 SV=2	NA	100 % (6)	Eef2	1
P58871	182 kDa tankyrase-1-binding protein OS=Mus musculus GN=Tnks1bp1 PE=1 SV=2	NA	0 % (0)	Tnks1bp1	1
P60122	RuvB-like 1 OS=Mus musculus GN=Ruvbl1 PE=1 SV=1	NA	100 % (3)	Ruvbl1	1
P60229	Eukaryotic translation initiation factor 3 subunit E OS=Mus musculus GN=Eif3e PE=1 SV=1	NA	74 % (1)	Eif3e	1
P60335	Poly(rC)-binding protein 1 OS=Mus musculus GN=Pcbp1 PE=1 SV=1	NA	100 % (5)	Pcbp1	1
P60843	Eukaryotic initiation factor 4A-I OS=Mus musculus GN=Eif4a1 PE=2 SV=1	NA	74 % (1)	Eif4a1	1
P61021	Ras-related protein Rab-5B OS=Mus musculus GN=Rab5b PE=1 SV=1	NA	0 % (0)	Rab5b	1
P61027	Ras-related protein Rab-10 OS=Mus musculus GN=Rab10 PE=1 SV=1	NA	0 % (0)	Rab10	1
P62259	14-3-3 protein epsilon OS=Mus musculus GN=Ywhae PE=1 SV=1	NA	100 % (2)	Ywhae	1
P62281	40S ribosomal protein S11 OS=Mus musculus GN=Rps11 PE=2 SV=3	NA	100 % (5)	Rps11	1
P62315	Small nuclear ribonucleoprotein Sm D1 OS=Mus musculus GN=Snrpd1 PE=2 SV=1	NA	80 % (1)	Snrpd1	1
P62717	60S ribosomal protein L18a OS=Mus musculus GN=Rpl18a PE=1 SV=1	NA	100 % (5)	Rpl18a	1
P62814	V-type proton ATPase subunit B, brain isoform OS=Mus musculus GN=Atp6v1b2 PE=1 SV=1	NA	0 % (0)	Atp6v1b2	1
P62821 (+1)	Ras-related protein Rab-1A OS=Mus musculus GN=Rab1A PE=1 SV=3	NA	73 % (1)	Rab1A	1
P62827	GTP-binding nuclear protein Ran OS=Mus musculus GN=Ran PE=1 SV=3	NA	100 % (1)	Ran	1
P62849 (+2)	40S ribosomal protein S24 OS=Mus musculus GN=Rps24 PE=1 SV=1	NA	100 % (3)	Rps24	1
P62862	40S ribosomal protein S30 OS=Mus musculus GN=Fau PE=3 SV=1	NA	100 % (1)	Fau	1
P62911	60S ribosomal protein L32 OS=Mus musculus GN=Rpl32 PE=2 SV=2	NA	100 % (1)	Rpl32	1
P62962	Profilin-1 OS=Mus musculus GN=Pfn1 PE=1 SV=2	NA	100 % (0)	Pfn1	1
P62984	Ubiquitin-60S ribosomal protein L40 OS=Mus musculus GN=Uba52 PE=1 SV=2	NA	80 % (1)	Uba52	1
P63037	DnaJ homolog subfamily A member 1 OS=Mus musculus GN=Dnaja1 PE=1 SV=1	NA	31 % (0)	Dnaja1	1
P63038	60 kDa heat shock protein, mitochondrial OS=Mus musculus GN=Hspd1 PE=1 SV=1	NA	100 % (2)	Hspd1	1
P63089	Pleiotrophin OS=Mus musculus GN=Ptn PE=2 SV=1	NA	100 % (2)	Ptn	1
P63168	Dynein light chain 1, cytoplasmic OS=Mus musculus GN=Dynll1 PE=1 SV=1	NA	100 % (2)	Dynll1	1
P63242	Eukaryotic translation initiation factor 5A-1 OS=Mus musculus GN=Eif5a PE=1 SV=2	NA	100 % (2)	Eif5a	1
P63330	Serine/threonine-protein phosphatase 2A catalytic subunit alpha isoform OS=Mus musculus GN=Ppp2ca PE=1 SV=1	NA	73 % (1)	Ppp2ca	1
P67984	60S ribosomal protein L22 OS=Mus musculus GN=Rpl22 PE=2 SV=2	NA	100 % (3)	Rpl22	1
P68037	Ubiquitin-conjugating enzyme E2 L3 OS=Mus musculus GN=Ube2l3 PE=2 SV=1	NA	80 % (1)	Ube2l3	1
P68181 (+3)	cAMP-dependent protein kinase catalytic subunit beta OS=Mus musculus GN=Prkacb PE=1 SV=2	NA	74 % (2)	Prkacb	1
P68368	Tubulin alpha-4A chain OS=Mus musculus GN=Tuba4a PE=1 SV=1	NA	100 % (1)	Tuba4a	1
P68372	Tubulin beta-4B chain OS=Mus musculus GN=Tubb4b PE=1 SV=1	NA	100 % (1)	Tubb4b	1
P68510	14-3-3 protein eta OS=Mus musculus GN=Ywhah PE=1 SV=2	NA	0 % (0)	Ywhah	1
P70195	Proteasome subunit beta type-7 OS=Mus musculus GN=Psmb7 PE=1 SV=1	NA	73 % (0)	Psmb7	1
P70296	Phosphatidylethanolamine-binding protein 1 OS=Mus musculus GN=Pebp1 PE=1 SV=3	NA	100 % (2)	Pebp1	1
P70353	Nuclear transcription factor Y subunit gamma OS=Mus musculus GN=Nfyc PE=2 SV=2	NA	100 % (2)	Nfyc	1
P70372	ELAV-like protein 1 OS=Mus musculus GN=Elavl1 PE=1 SV=2	NA	100 % (3)	Elavl1	1
P70670	Nascent polypeptide-associated complex subunit alpha, muscle-specific form OS=Mus musculus GN=Naca PE=1 SV=2	NA	0 % (0)	Naca	1
P80314	T-complex protein 1 subunit beta OS=Mus musculus GN=Cct2 PE=1 SV=4	NA	100 % (1)	Cct2	1
P83741-2 (+4)	Isoform 2 of Serine/threonine-protein kinase WNK1 OS=Mus musculus GN=Wnk1	NA	38 % (0)	Wnk1	1
P83882	60S ribosomal protein L36a OS=Mus musculus GN=Rpl36a PE=3 SV=2	NA	100 % (1)	Rpl36a	1
P84084	ADP-ribosylation factor 5 OS=Mus musculus GN=Arf5 PE=2 SV=2	NA	80 % (0)	Arf5	1
P84228	Histone H3.2 OS=Mus musculus GN=Hist1h3b PE=1 SV=2	NA	100 % (2)	Hist1h3b	1
P97807 (+1)	Fumarate hydratase, mitochondrial OS=Mus musculus GN=Fh PE=1 SV=3	NA	0 % (0)	Fh	1
P97855	Ras GTPase-activating protein-binding protein 1 OS=Mus musculus GN=G3bp1 PE=1 SV=1	NA	74 % (0)	G3bp1	1
P99026	Proteasome subunit beta type-4 OS=Mus musculus GN=Psmb4 PE=1 SV=1	NA	73 % (1)	Psmb4	1
Q02257	Junction plakoglobin OS=Mus musculus GN=Jup PE=1 SV=3	NA	100 % (1)	Jup	1
Q04750	DNA topoisomerase 1 OS=Mus musculus GN=Top1 PE=1 SV=2	NA	100 % (1)	Top1	1
Q07113	Cation-independent mannose-6-phosphate receptor OS=Mus musculus GN=Igf2r PE=1 SV=1	NA	0 % (0)	Igf2r	1
Q07813	Apoptosis regulator BAX OS=Mus musculus GN=Bax PE=1 SV=1	NA	0 % (0)	Bax	1
Q08024-2	Isoform 2 of Core-binding factor subunit beta OS=Mus musculus GN=Cbfb	NA	100 % (2)	Cbfb	1
Q0VEE6	Zinc finger protein 800 OS=Mus musculus GN=Znf800 PE=1 SV=1	NA	100 % (2)	Znf800	1
Q149F3 (+2)	Eukaryotic peptide chain release factor GTP-binding subunit ERF3B OS=Mus musculus GN=Gspt2 PE=1 SV=1	NA	0 % (0)	Gspt2	1
Q3TCH7	Cullin-4A OS=Mus musculus GN=Cul4a PE=1 SV=1	NA	0 % (0)	Cul4a	1
Q3TCN2 (+1)	Putative phospholipase B-like 2 OS=Mus musculus GN=Plbd2 PE=1 SV=2	NA	0 % (0)	Plbd2	1
Q3TEA8 (+2)	Heterochromatin protein 1-binding protein 3 OS=Mus musculus GN=Hp1bp3 PE=1 SV=1	NA	0 % (0)	Hp1bp3	1
Q3TLH4 (+1)	Protein PRRC2C OS=Mus musculus GN=Prrc2c PE=1 SV=3	NA	100 % (4)	Prrc2c	1
Q3TML0 (+1)	Protein disulfide-isomerase A6 OS=Mus musculus GN=Pdia6 PE=2 SV=1	NA	74 % (1)	Pdia6	1
Q3TMP1	General transcription factor IIIC, polypeptide 3 OS=Mus musculus GN=Gtf3c3 PE=2 SV=1	NA	100 % (0)	Gtf3c3	1
Q3TUE1 (+2)	Far upstream element-binding protein 1 OS=Mus musculus GN=Fubp1 PE=2 SV=1	NA	0 % (0)	Fubp1	1
Q3TXS7	26S proteasome non-ATPase regulatory subunit 1 OS=Mus musculus GN=Psmd1 PE=1 SV=1	NA	100 % (2)	Psmd1	1
Q3U741 (+1)	DEAD (Asp-Glu-Ala-Asp) box polypeptide 17, isoform CRA_a OS=Mus musculus GN=Ddx17 PE=2 SV=1	NA	43 % (0)	Ddx17	1
Q3UII8	Metastasis-associated protein MTA3 OS=Mus musculus GN=Mta3 PE=2 SV=1	NA	100 % (9)	Mta3	1
Q3UX10	Tubulin alpha chain-like 3 OS=Mus musculus GN=Tubal3 PE=2 SV=2	NA	0 % (0)	Tubal3	1
Q3V117 (+1)	ATP citrate lyase OS=Mus musculus GN=Acly PE=2 SV=1	NA	0 % (0)	Acly	1
Q4U2R1	E3 ubiquitin-protein ligase HERC2 OS=Mus musculus GN=Herc2 PE=1 SV=3	NA	100 % (0)	Herc2	1
Q4VBE8	WD repeat-containing protein 18 OS=Mus musculus GN=Wdr18 PE=1 SV=1	NA	74 % (1)	Wdr18	1
Q569Z6	Thyroid hormone receptor-associated protein 3 OS=Mus musculus GN=Thrap3 PE=1 SV=1	NA	0 % (0)	Thrap3	1
Q5SX46 (+1)	Mitochondrial 2-oxoglutarate/malate carrier protein (Fragment) OS=Mus musculus GN=Slc25a11 PE=2 SV=1	NA	100 % (2)	Slc25a11	1
Q5SX75 (+2)	Procollagen-proline, 2-oxoglutarate 4-dioxygenase (Proline 4-hydroxylase), alpha II polypeptide OS=Mus musculus GN=P4ha2 PE=2 SV=1	NA	100 % (1)	P4ha2	1
Q5XJY5	Coatomer subunit delta OS=Mus musculus GN=Arcn1 PE=2 SV=2	NA	74 % (1)	Arcn1	1
Q60668 (+1)	Heterogeneous nuclear ribonucleoprotein D0 OS=Mus musculus GN=Hnrnpd PE=1 SV=2	NA	100 % (2)	Hnrnpd	1
Q60737	Casein kinase II subunit alpha OS=Mus musculus GN=Csnk2a1 PE=1 SV=2	NA	100 % (1)	Csnk2a1	1
Q60864	Stress-induced-phosphoprotein 1 OS=Mus musculus GN=Stip1 PE=1 SV=1	NA	0 % (0)	Stip1	1
Q60932-2	Isoform Mt-VDAC1 of Voltage-dependent anion-selective channel protein 1 OS=Mus musculus GN=Vdac1	NA	100 % (2)	Vdac1	1
Q60973	Histone-binding protein RBBP7 OS=Mus musculus GN=Rbbp7 PE=1 SV=1	NA	100 % (6)	Rbbp7	1
Q61024	Asparagine synthetase [glutamine-hydrolyzing] OS=Mus musculus GN=Asns PE=2 SV=3	NA	0 % (0)	Asns	1
Q61029 (+1)	Lamina-associated polypeptide 2, isoforms beta/delta/epsilon/gamma OS=Mus musculus GN=Tmpo PE=1 SV=4	NA	74 % (1)	Tmpo	1
Q61166	Microtubule-associated protein RP/EB family member 1 OS=Mus musculus GN=Mapre1 PE=1 SV=3	NA	0 % (0)	Mapre1	1
Q61171	Peroxiredoxin-2 OS=Mus musculus GN=Prdx2 PE=1 SV=3	NA	100 % (1)	Prdx2	1
Q61584 (+6)	Fragile X mental retardation syndrome-related protein 1 OS=Mus musculus GN=Fxr1 PE=1 SV=2	NA	0 % (0)	Fxr1	1
Q61598 (+1)	Rab GDP dissociation inhibitor beta OS=Mus musculus GN=Gdi2 PE=1 SV=1	NA	0 % (0)	Gdi2	1
Q61781	Keratin, type I cytoskeletal 14 OS=Mus musculus GN=Krt14 PE=1 SV=2	NA	100 % (2)	Krt14	1
Q61897	Keratin, type I cuticular Ha3-II OS=Mus musculus GN=Krt33b PE=2 SV=2	NA	99 % (1)	Krt33b	1
Q61990 (+2)	Poly(rC)-binding protein 2 OS=Mus musculus GN=Pcbp2 PE=1 SV=1	NA	73 % (0)	Pcbp2	1
Q62186 (+1)	Translocon-associated protein subunit delta OS=Mus musculus GN=Ssr4 PE=2 SV=1	NA	100 % (2)	Ssr4	1
Q62425	NADH dehydrogenase [ubiquinone] 1 alpha subcomplex subunit 4 OS=Mus musculus GN=Ndufa4 PE=1 SV=2	NA	100 % (0)	Ndufa4	1
Q64522	Histone H2A type 2-B OS=Mus musculus GN=Hist2h2ab PE=1 SV=3	NA	100 % (3)	Hist2h2ab	1
Q64727	Vinculin OS=Mus musculus GN=Vcl PE=1 SV=4	NA	0 % (0)	Vcl	1
Q6GQT1	Alpha-2-macroglobulin-P OS=Mus musculus GN=A2mp PE=2 SV=2	NA	80 % (0)	A2mp	1
Q6PB66	Leucine-rich PPR motif-containing protein, mitochondrial OS=Mus musculus GN=Lrpprc PE=1 SV=2	NA	0 % (0)	Lrpprc	1
Q6PGA0 (+1)	REST corepressor 3 OS=Mus musculus GN=Rcor3 PE=2 SV=2	NA	100 % (1)	Rcor3	1
Q6ZWU9	40S ribosomal protein S27 OS=Mus musculus GN=Rps27 PE=1 SV=3	NA	100 % (1)	Rps27	1
Q6ZWZ6	40S ribosomal protein S12 OS=Mus musculus GN=Rps12 PE=2 SV=1	NA	100 % (0)	Rps12	1
Q76MZ3	Serine/threonine-protein phosphatase 2A 65 kDa regulatory subunit A alpha isoform OS=Mus musculus GN=Ppp2r1a PE=1 SV=3	NA	74 % (0)	Ppp2r1a	1
Q78XF5	Oligosaccharyltransferase complex subunit OSTC OS=Mus musculus GN=Ostc PE=2 SV=1	NA	80 % (1)	Ostc	1
Q7TMM9 (+1)	Tubulin beta-2A chain OS=Mus musculus GN=Tubb2a PE=1 SV=1	NA	74 % (1)	Tubb2a	1
Q7TPR4 (+1)	Alpha-actinin-1 OS=Mus musculus GN=Actn1 PE=1 SV=1	NA	0 % (0)	Actn1	1
Q7TSC1	Protein PRRC2A OS=Mus musculus GN=Prrc2a PE=1 SV=1	NA	0 % (0)	Prrc2a	1
Q80T85	DDB1- and CUL4-associated factor 5 OS=Mus musculus GN=Dcaf5 PE=1 SV=2	NA	80 % (1)	Dcaf5	1
Q80UG5	Septin-9 OS=Mus musculus GN=Sept9 PE=1 SV=1	NA	100 % (0)	2009-09-01	1
Q80WJ7	Protein LYRIC OS=Mus musculus GN=Mtdh PE=1 SV=1	NA	100 % (2)	Mtdh	1
Q8BFY9 (+1)	Transportin-1 OS=Mus musculus GN=Tnpo1 PE=1 SV=2	NA	50 % (1)	Tnpo1	1
Q8BFZ9 (+1)	Erlin-2 OS=Mus musculus GN=Erlin2 PE=1 SV=1	NA	74 % (1)	Erlin2	1
Q8BG32	26S proteasome non-ATPase regulatory subunit 11 OS=Mus musculus GN=Psmd11 PE=1 SV=3	NA	74 % (0)	Psmd11	1
Q8BGD9	Eukaryotic translation initiation factor 4B OS=Mus musculus GN=Eif4b PE=1 SV=1	NA	0 % (0)	Eif4b	1
Q8BGJ5 (+1)	MCG13402, isoform CRA_a OS=Mus musculus GN=Ptbp1 PE=2 SV=1	NA	100 % (1)	Ptbp1	1
Q8BH04	Phosphoenolpyruvate carboxykinase [GTP], mitochondrial OS=Mus musculus GN=Pck2 PE=2 SV=1	NA	0 % (0)	Pck2	1
Q8BH59	Calcium-binding mitochondrial carrier protein Aralar1 OS=Mus musculus GN=Slc25a12 PE=1 SV=1	NA	100 % (6)	Slc25a12	1
Q8BH64	EH domain-containing protein 2 OS=Mus musculus GN=Ehd2 PE=1 SV=1	NA	0 % (0)	Ehd2	1
Q8BI84	Melanoma inhibitory activity protein 3 OS=Mus musculus GN=Mia3 PE=1 SV=2	NA	0 % (0)	Mia3	1
Q8BJH1	Zinc finger C2HC domain-containing protein 1A OS=Mus musculus GN=Zc2hc1a PE=2 SV=1	NA	100 % (2)	Zc2hc1a	1
Q8BKC5	Importin-5 OS=Mus musculus GN=Ipo5 PE=1 SV=3	NA	0 % (0)	Ipo5	1
Q8BKZ9	Pyruvate dehydrogenase protein X component, mitochondrial OS=Mus musculus GN=Pdhx PE=2 SV=1	NA	100 % (0)	Pdhx	1
Q8BL66	Early endosome antigen 1 OS=Mus musculus GN=Eea1 PE=2 SV=2	NA	0 % (0)	Eea1	1
Q8BM14 (+1)	Lipase member K OS=Mus musculus GN=Lipk PE=2 SV=1	NA	0 % (0)	Lipk	1
Q8BMQ2	General transcription factor 3C polypeptide 4 OS=Mus musculus GN=Gtf3c4 PE=1 SV=2	NA	100 % (1)	Gtf3c4	1
Q8BP67	60S ribosomal protein L24 OS=Mus musculus GN=Rpl24 PE=2 SV=2	NA	100 % (4)	Rpl24	1
Q8BP71 (+12)	RNA binding protein fox-1 homolog 2 OS=Mus musculus GN=Rbfox2 PE=1 SV=2	NA	74 % (1)	Rbfox2	1
Q8BP92	Reticulocalbin-2 OS=Mus musculus GN=Rcn2 PE=2 SV=1	NA	100 % (3)	Rcn2	1
Q8BTI8 (+2)	Serine/arginine repetitive matrix protein 2 OS=Mus musculus GN=Srrm2 PE=1 SV=3	NA	100 % (1)	Srrm2	1
Q8BWY3	Eukaryotic peptide chain release factor subunit 1 OS=Mus musculus GN=Etf1 PE=1 SV=4	NA	0 % (0)	Etf1	1
Q8BX02	KN motif and ankyrin repeat domain-containing protein 2 OS=Mus musculus GN=Kank2 PE=1 SV=1	NA	100 % (3)	Kank2	1
Q8BX10 (+1)	Serine/threonine-protein phosphatase PGAM5, mitochondrial OS=Mus musculus GN=Pgam5 PE=2 SV=1	NA	100 % (2)	Pgam5	1
Q8C341-2-R (+1)	Isoform 2 of SUN domain-containing ossification factor OS=Mus musculus GN=Suco	NA	80 % (1)	Suco	1
Q8C796	REST corepressor 2 OS=Mus musculus GN=Rcor2 PE=2 SV=1	NA	100 % (2)	Rcor2	1
Q8CGK3	Lon protease homolog, mitochondrial OS=Mus musculus GN=Lonp1 PE=1 SV=2	NA	0 % (0)	Lonp1	1
Q8CI94	Glycogen phosphorylase, brain form OS=Mus musculus GN=Pygb PE=1 SV=3	NA	0 % (0)	Pygb	1
Q8K224	N-acetyltransferase 10 OS=Mus musculus GN=Nat10 PE=2 SV=1	NA	50 % (1)	Nat10	1
Q8K284 (+1)	General transcription factor 3C polypeptide 1 OS=Mus musculus GN=Gtf3c1 PE=2 SV=2	NA	0 % (0)	Gtf3c1	1
Q8K297	Procollagen galactosyltransferase 1 OS=Mus musculus GN=Glt25d1 PE=1 SV=2	NA	100 % (2)	Glt25d1	1
Q8K2F8	Protein LSM14 homolog A OS=Mus musculus GN=Lsm14a PE=1 SV=1	NA	0 % (0)	Lsm14a	1
Q8K310	Matrin-3 OS=Mus musculus GN=Matr3 PE=1 SV=1	NA	0 % (0)	Matr3	1
Q8K3G5	Inactive serine/threonine-protein kinase VRK3 OS=Mus musculus GN=Vrk3 PE=1 SV=2	NA	100 % (4)	Vrk3	1
Q8K4B0	Metastasis-associated protein MTA1 OS=Mus musculus GN=Mta1 PE=1 SV=1	NA	100 % (30)	Mta1	1
Q8K4Q8	Collectin-12 OS=Mus musculus GN=Colec12 PE=1 SV=1	NA	100 % (2)	Colec12	1
Q8QZV7	Protein asunder homolog OS=Mus musculus GN=Asun PE=2 SV=2	NA	100 % (2)	Asun	1
Q8QZY9	Splicing factor 3B subunit 4 OS=Mus musculus GN=Sf3b4 PE=2 SV=1	NA	0 % (0)	Sf3b4	1
Q8R010	Aminoacyl tRNA synthase complex-interacting multifunctional protein 2 OS=Mus musculus GN=Aimp2 PE=1 SV=2	NA	100 % (2)	Aimp2	1
Q8R0S1	Cyclic AMP-dependent transcription factor ATF-7 OS=Mus musculus GN=Atf7 PE=1 SV=1	NA	100 % (2)	Atf7	1
Q8R0S2-2 (+2)	Isoform 2 of IQ motif and SEC7 domain-containing protein 1 OS=Mus musculus GN=Iqsec1	NA	100 % (1)	Iqsec1	1
Q8R0X7 (+1)	Sphingosine-1-phosphate lyase 1 OS=Mus musculus GN=Sgpl1 PE=2 SV=1	NA	74 % (1)	Sgpl1	1
Q8R2K3	Single-stranded DNA-binding protein OS=Mus musculus GN=Ssbp1 PE=2 SV=1	NA	100 % (3)	Ssbp1	1
Q8R3P6	von Willebrand factor A domain-containing protein 9 OS=Mus musculus GN=Vwa9 PE=2 SV=1	NA	74 % (1)	Vwa9	1
Q8VDJ3	Vigilin OS=Mus musculus GN=Hdlbp PE=1 SV=1	NA	42 % (0)	Hdlbp	1
Q8VDM4	26S proteasome non-ATPase regulatory subunit 2 OS=Mus musculus GN=Psmd2 PE=1 SV=1	NA	50 % (1)	Psmd2	1
Q8VDP6	CDP-diacylglycerol--inositol 3-phosphatidyltransferase OS=Mus musculus GN=Cdipt PE=1 SV=1	NA	73 % (1)	Cdipt	1
Q8VHG2 (+2)	Angiomotin OS=Mus musculus GN=Amot PE=1 SV=3	NA	100 % (3)	Amot	1
Q8VI24-2	Isoform 2 of DNA-binding protein SATB2 OS=Mus musculus GN=Satb2	NA	100 % (2)	Satb2	1
Q8VIJ6	Splicing factor, proline- and glutamine-rich OS=Mus musculus GN=Sfpq PE=1 SV=1	NA	100 % (0)	Sfpq	1
Q91V61 (+1)	Sideroflexin-3 OS=Mus musculus GN=Sfxn3 PE=1 SV=1	NA	100 % (4)	Sfxn3	1
Q91VD9	NADH-ubiquinone oxidoreductase 75 kDa subunit, mitochondrial OS=Mus musculus GN=Ndufs1 PE=1 SV=2	NA	0 % (0)	Ndufs1	1
Q91VI7	Ribonuclease inhibitor OS=Mus musculus GN=Rnh1 PE=1 SV=1	NA	0 % (0)	Rnh1	1
Q91YQ5	Dolichyl-diphosphooligosaccharide--protein glycosyltransferase subunit 1 OS=Mus musculus GN=Rpn1 PE=2 SV=1	NA	72 % (0)	Rpn1	1
Q91YU3	Myb/SANT-like DNA-binding domain-containing protein 4 OS=Mus musculus GN=Msantd4 PE=2 SV=1	NA	100 % (1)	Msantd4	1
Q91ZJ5 (+1)	UTP--glucose-1-phosphate uridylyltransferase OS=Mus musculus GN=Ugp2 PE=2 SV=3	NA	0 % (0)	Ugp2	1
Q922F4	Tubulin beta-6 chain OS=Mus musculus GN=Tubb6 PE=1 SV=1	NA	74 % (1)	Tubb6	1
Q99K41	EMILIN-1 OS=Mus musculus GN=Emilin1 PE=1 SV=1	NA	100 % (8)	Emilin1	1
Q99K85 (+1)	Phosphoserine aminotransferase OS=Mus musculus GN=Psat1 PE=1 SV=1	NA	0 % (0)	Psat1	1
Q99KC8	von Willebrand factor A domain-containing protein 5A OS=Mus musculus GN=Vwa5a PE=1 SV=2	NA	0 % (0)	Vwa5a	1
Q99KJ8	Dynactin subunit 2 OS=Mus musculus GN=Dctn2 PE=1 SV=3	NA	100 % (1)	Dctn2	1
Q99LU0 (+1)	Charged multivesicular body protein 1b-1 OS=Mus musculus GN=Chmp1b1 PE=1 SV=1	NA	73 % (1)	Chmp1b1	1
Q99P72 (+2)	Reticulon-4 OS=Mus musculus GN=Rtn4 PE=1 SV=2	NA	0 % (0)	Rtn4	1
Q99PT1	Rho GDP-dissociation inhibitor 1 OS=Mus musculus GN=Arhgdia PE=1 SV=3	NA	73 % (1)	Arhgdia	1
Q99PU8-3 (+3)	Isoform 3 of Putative ATP-dependent RNA helicase DHX30 OS=Mus musculus GN=Dhx30	NA	0 % (0)	Dhx30	1
Q9CPR4 (+1)	60S ribosomal protein L17 OS=Mus musculus GN=Rpl17 PE=2 SV=3	NA	100 % (4)	Rpl17	1
Q9CQ22	Ragulator complex protein LAMTOR1 OS=Mus musculus GN=Lamtor1 PE=1 SV=1	NA	80 % (1)	Lamtor1	1
Q9CQ65	S-methyl-5'-thioadenosine phosphorylase OS=Mus musculus GN=Mtap PE=2 SV=1	NA	23 % (0)	Mtap	1
Q9CQA3	Succinate dehydrogenase [ubiquinone] iron-sulfur subunit, mitochondrial OS=Mus musculus GN=Sdhb PE=1 SV=1	NA	0 % (0)	Sdhb	1
Q9CQD1	Ras-related protein Rab-5A OS=Mus musculus GN=Rab5a PE=1 SV=1	NA	71 % (0)	Rab5a	1
Q9CQM2	ER lumen protein retaining receptor 2 OS=Mus musculus GN=Kdelr2 PE=2 SV=1	NA	100 % (2)	Kdelr2	1
Q9CQM8	60S ribosomal protein L21 OS=Mus musculus GN=Rpl21 PE=2 SV=1	NA	100 % (1)	Rpl21	1
Q9CQQ7	ATP synthase subunit b, mitochondrial OS=Mus musculus GN=Atp5f1 PE=1 SV=1	NA	0 % (0)	Atp5f1	1
Q9CQV8 (+1)	14-3-3 protein beta/alpha OS=Mus musculus GN=Ywhab PE=1 SV=3	NA	100 % (2)	Ywhab	1
Q9CQW9	Interferon-induced transmembrane protein 3 OS=Mus musculus GN=Ifitm3 PE=1 SV=1	NA	100 % (1)	Ifitm3	1
Q9CR57	60S ribosomal protein L14 OS=Mus musculus GN=Rpl14 PE=2 SV=3	NA	100 % (2)	Rpl14	1
Q9CX00	IST1 homolog OS=Mus musculus GN=Ist1 PE=2 SV=1	NA	100 % (1)	Ist1	1
Q9CX86	Heterogeneous nuclear ribonucleoprotein A0 OS=Mus musculus GN=Hnrnpa0 PE=1 SV=1	NA	100 % (3)	Hnrnpa0	1
Q9CXL3	Uncharacterized protein C7orf50 homolog OS=Mus musculus PE=2 SV=3	NA	10 % (0)	Uncharacterized protein C7orf50 homolog OS=Mus musculus	1
Q9CY50	Translocon-associated protein subunit alpha OS=Mus musculus GN=Ssr1 PE=1 SV=1	NA	73 % (1)	Ssr1	1
Q9CZN7	Serine hydroxymethyltransferase OS=Mus musculus GN=Shmt2 PE=2 SV=1	NA	74 % (1)	Shmt2	1
Q9CZP3	Protein Zfp655 OS=Mus musculus GN=Zfp655 PE=2 SV=1	NA	100 % (2)	Zfp655	1
Q9CZY3	Ubiquitin-conjugating enzyme E2 variant 1 OS=Mus musculus GN=Ube2v1 PE=1 SV=1	NA	0 % (0)	Ube2v1	1
Q9D0F3	Protein ERGIC-53 OS=Mus musculus GN=Lman1 PE=2 SV=1	NA	74 % (0)	Lman1	1
Q9D0R2	Threonine--tRNA ligase, cytoplasmic OS=Mus musculus GN=Tars PE=1 SV=2	NA	50 % (1)	Tars	1
Q9D0T1	NHP2-like protein 1 OS=Mus musculus GN=Nhp2l1 PE=2 SV=4	NA	80 % (1)	Nhp2l1	1
Q9D1G1	Ras-related protein Rab-1B OS=Mus musculus GN=Rab1b PE=1 SV=1	NA	0 % (0)	Rab1b	1
Q9D1M0	Protein SEC13 homolog OS=Mus musculus GN=Sec13 PE=2 SV=3	NA	73 % (1)	Sec13	1
Q9D2G2	Dihydrolipoyllysine-residue succinyltransferase component of 2-oxoglutarate dehydrogenase complex, mitochondrial OS=Mus musculus GN=Dlst PE=1 SV=1	NA	100 % (2)	Dlst	1
Q9D7S7 (+1)	60S ribosomal protein L22-like 1 OS=Mus musculus GN=Rpl22l1 PE=1 SV=1	NA	80 % (1)	Rpl22l1	1
Q9DB20	ATP synthase subunit O, mitochondrial OS=Mus musculus GN=Atp5o PE=1 SV=1	NA	73 % (1)	Atp5o	1
Q9DBC7	cAMP-dependent protein kinase type I-alpha regulatory subunit OS=Mus musculus GN=Prkar1a PE=1 SV=3	NA	100 % (4)	Prkar1a	1
Q9DBD5	Proline-, glutamic acid- and leucine-rich protein 1 OS=Mus musculus GN=Pelp1 PE=1 SV=2	NA	100 % (2)	Pelp1	1
Q9DBG5	Perilipin-3 OS=Mus musculus GN=Plin3 PE=1 SV=1	NA	0 % (0)	Plin3	1
Q9DBJ1	Phosphoglycerate mutase 1 OS=Mus musculus GN=Pgam1 PE=1 SV=3	NA	100 % (2)	Pgam1	1
Q9DBZ5	Eukaryotic translation initiation factor 3 subunit K OS=Mus musculus GN=Eif3k PE=1 SV=1	NA	73 % (0)	Eif3k	1
Q9DCD6	Gamma-aminobutyric acid receptor-associated protein OS=Mus musculus GN=Gabarap PE=1 SV=2	NA	100 % (1)	Gabarap	1
Q9ERA0 (+2)	Alpha-globin transcription factor CP2 OS=Mus musculus GN=Tfcp2 PE=1 SV=1	NA	74 % (1)	Tfcp2	1
Q9ERD7	Tubulin beta-3 chain OS=Mus musculus GN=Tubb3 PE=1 SV=1	NA	100 % (2)	Tubb3	1
Q9JHU9	Inositol-3-phosphate synthase 1 OS=Mus musculus GN=Isyna1 PE=2 SV=1	NA	0 % (0)	Isyna1	1
Q9JJI8	60S ribosomal protein L38 OS=Mus musculus GN=Rpl38 PE=2 SV=3	NA	100 % (2)	Rpl38	1
Q9JKB3 (+1)	DNA-binding protein A OS=Mus musculus GN=Csda PE=1 SV=2	NA	74 % (0)	Csda	1
Q9JLV1	BAG family molecular chaperone regulator 3 OS=Mus musculus GN=Bag3 PE=1 SV=2	NA	100 % (2)	Bag3	1
Q9QZD8	Mitochondrial dicarboxylate carrier OS=Mus musculus GN=Slc25a10 PE=2 SV=2	NA	73 % (1)	Slc25a10	1
Q9QZE5	Coatomer subunit gamma-1 OS=Mus musculus GN=Copg1 PE=2 SV=1	NA	100 % (1)	Copg1	1
Q9R002	Interferon-activable protein 202 OS=Mus musculus GN=Ifi202 PE=1 SV=3	NA	100 % (7)	Ifi202	1
Q9R0P5	Destrin OS=Mus musculus GN=Dstn PE=1 SV=3	NA	80 % (0)	Dstn	1
Q9R112	Sulfide:quinone oxidoreductase, mitochondrial OS=Mus musculus GN=Sqrdl PE=2 SV=3	NA	100 % (3)	Sqrdl	1
Q9R1P4	Proteasome subunit alpha type-1 OS=Mus musculus GN=Psma1 PE=1 SV=1	NA	100 % (0)	Psma1	1
Q9WTM5	RuvB-like 2 OS=Mus musculus GN=Ruvbl2 PE=2 SV=3	NA	100 % (4)	Ruvbl2	1
Q9WTX2	Interferon-inducible double stranded RNA-dependent protein kinase activator A OS=Mus musculus GN=Prkra PE=1 SV=1	NA	100 % (0)	Prkra	1
Q9WU02-R	Vasopressin V1b receptor OS=Mus musculus GN=Avpr1b PE=2 SV=1	NA	74 % (1)	Avpr1b	1
Q9WUK4	Replication factor C subunit 2 OS=Mus musculus GN=Rfc2 PE=2 SV=1	NA	100 % (1)	Rfc2	1
Q9WV55	Vesicle-associated membrane protein-associated protein A OS=Mus musculus GN=Vapa PE=1 SV=2	NA	100 % (1)	Vapa	1
Q9Z1Q9	Valine--tRNA ligase OS=Mus musculus GN=Vars PE=2 SV=1	NA	0 % (0)	Vars	1
Q9Z1X4 (+3)	Interleukin enhancer-binding factor 3 OS=Mus musculus GN=Ilf3 PE=1 SV=2	NA	0 % (0)	Ilf3	1
Q9Z1Z0 (+2)	General vesicular transport factor p115 OS=Mus musculus GN=Uso1 PE=1 SV=2	NA	0 % (0)	Uso1	1
Q9Z2D8	Methyl-CpG-binding domain protein 3 OS=Mus musculus GN=Mbd3 PE=1 SV=1	NA	100 % (14)	Mbd3	1
Q9Z2E1	Methyl-CpG-binding domain protein 2 OS=Mus musculus GN=Mbd2 PE=2 SV=2	NA	100 % (10)	Mbd2	1
Q9Z2I8 (+1)	Succinyl-CoA ligase [GDP-forming] subunit beta, mitochondrial OS=Mus musculus GN=Suclg2 PE=2 SV=3	NA	0 % (0)	Suclg2	1
Q9Z2K1	Keratin, type I cytoskeletal 16 OS=Mus musculus GN=Krt16 PE=1 SV=3	NA	50 % (1)	Krt16	1
Q9Z2T6	Keratin, type II cuticular Hb5 OS=Mus musculus GN=Krt85 PE=2 SV=2	NA	100 % (1)	Krt85	1
