# Supplementary material for: Identification of the transcription factor ZEB1 as a central component of the adipogenic gene regulatory network
Source: eLife journal article supplement (doi:10.7554/elife.03346), 2014-08-26
Supplement: supp [file elife_poa_e03346_Supplementary_file_7.xlsx]

## Sheet: Table 7 - GREAT GeneOntology
ZEB1 LATE vs. STATIC	# GREAT version 2.0.2	Species assembly: mm9	Association rule: Basal+extension: 5000 bp upstream, 1000 bp downstream, 1000000 bp max extension, curated regulatory domains included
	Term Name	Hyper Rank	Hyper Raw P-Value	Hyper FDR Q-Val	Hyper Fold Enrichment	Hyper Foreground Region Hits	Hyper Total Regions	Hyper Region Set Coverage	Hyper Foreground Gene Hits	Total Genes Annotated
	brown fat cell differentiation	2	3.31899e-07	0.00142435	4.48022	17	205	0.0211706	11	27
	organ regeneration	3	2.15277e-06	0.00615908	2.9362	25	460	0.0311333	10	58
	negative regulation of sequestering of triglyceride	4	3.06952e-06	0.00658642	8.8206	8	49	0.00996264	2	4
	male germ-line stem cell division	6	3.99642e-06	0.00571689	13.5065	6	24	0.00747198	1	2
	fat cell differentiation	7	9.55857e-06	0.0117202	2.35216	32	735	0.0398506	23	79
	positive regulation of fat cell differentiation	9	1.56069e-05	0.0148837	4.20563	13	167	0.0161893	4	19
	cellular response to insulin stimulus	10	2.22656e-05	0.0191105	2.28799	31	732	0.0386052	19	94
	asymmetric cell division	11	2.37189e-05	0.0185072	10.1299	6	32	0.00747198	1	4
	regulation of lipid storage	12	2.67739e-05	0.01915	4.29347	12	151	0.014944	5	30
	negative regulation of lipid storage	13	3.31282e-05	0.0218723	6.45088	8	67	0.00996264	2	16
	regulation of sequestering of triglyceride	14	3.6941e-05	0.0226475	6.35602	8	68	0.00996264	2	9
	one-carbon metabolic process	17	3.95369e-05	0.0199615	2.00669	39	1050	0.0485679	30	257
	white fat cell differentiation	18	3.98399e-05	0.018997	4.46833	11	133	0.0136986	7	14
	regeneration	22	8.09714e-05	0.0315899	2.0501	34	896	0.0423412	17	115
ZEB1 EARLY vs. STATIC	# GREAT version 2.0.2	Species assembly: mm9	Association rule: Basal+extension: 5000 bp upstream, 1000 bp downstream, 1000000 bp max extension, curated regulatory domains included
	Term Name	Hyper Rank	Hyper Raw P-Value	Hyper FDR Q-Val	Hyper Fold Enrichment	Hyper Foreground Region Hits	Hyper Total Regions	Hyper Region Set Coverage	Hyper Foreground Gene Hits	Total Genes Annotated
	chemokine (C-C motif) ligand 2 secretion	3	2.11986e-05	0.0606493	48.5729	3	6	0.00560748	1	1
	regulation of eosinophil degranulation	3	2.11986e-05	0.0606493	48.5729	3	6	0.00560748	1	2
	positive regulation of eosinophil degranulation	3	2.11986e-05	0.0606493	48.5729	3	6	0.00560748	1	1
	positive regulation of neutrophil mediated killing of gram-negative bacterium	3	2.11986e-05	0.0606493	48.5729	3	6	0.00560748	1	1
	interleukin-10 secretion	3	2.11986e-05	0.0606493	48.5729	3	6	0.00560748	1	1
	interferon-gamma secretion	3	2.11986e-05	0.0606493	48.5729	3	6	0.00560748	1	1
	negative regulation of chemokine secretion	3	2.11986e-05	0.0606493	48.5729	3	6	0.00560748	1	1
	dendritic cell differentiation	3	2.11986e-05	0.0606493	48.5729	3	6	0.00560748	1	3
	mature dendritic cell differentiation	3	2.11986e-05	0.0606493	48.5729	3	6	0.00560748	1	2
	positive regulation of phagocytosis, engulfment	12	2.37576e-05	0.0169926	22.8578	4	17	0.00747664	2	3
	negative regulation of tumor necrosis factor-mediated signaling pathway	15	3.68132e-05	0.0210645	41.6339	3	7	0.00560748	1	2
	positive regulation of toll-like receptor 2 signaling pathway	15	3.68132e-05	0.0210645	41.6339	3	7	0.00560748	1	2
	peripheral nervous system axon regeneration	17	8.68501e-05	0.0438491	8.32678	6	70	0.0112149	2	5
	positive regulation of interleukin-6 secretion	18	8.70033e-05	0.0414861	32.3819	3	9	0.00560748	2	2
