# Supplementary material for: Identification of the transcription factor ZEB1 as a central component of the adipogenic gene regulatory network
Source: eLife journal article supplement (doi:10.7554/elife.03346), 2014-08-26
Supplement: supp [file elife_poa_e03346_Supplementary_file_8.xlsx]

## Sheet: Table 8 - ClinicalData
Spearman's correlation coefficients and P values all datasets						Raw values for significantly correlated factors
	Zeb1.0.in.SVF (rho)	Zeb1.0.in.SVF (p)	RORg.0.in.SVF (rho)	RORg.0.in.SVF (p)		Nr.	Sex [1=m; 2=w]	Adiponectin 0	Fettmasse 0	Fettmasse 0	Zeb1 0 in SVF	RORg 0 in SVF	Differentiation 0
Gewicht.0	0.329321	0.0332012	0.456437	0.0375397			[m=1; w=2]	[µg/ml]	[kg]	[%]	[norm to 36B4]	[norm to 36B4]	[% of cells]
BMI.0	0.240802	0.124493	0.350114	0.119732		0-01	2	5.4	68.8	52.2		5.51
Waist.0	0.178798	0.327525	0.209091	0.539114		0-02	1	3.9	32.1	29.3	0.00124	5.92	2.17
Hip.0	0.400257	0.0232109	0.388132	0.238175		0-03	1	2.7	54	38.3	0.0008	6.21	0.26
W.H.ratio.0	-0.136376	0.456723	-0.0909091	0.796592		0-04	2	2.6	51.4	45.5	0.00227	2.24	3.8
RR.sys.0	0.028945	0.855613	0.0377605	0.870911		0-05	2	4.1			1e-05	4.14	1.38
RR.dias.0	-0.00284369	0.98574	0.102415	0.658671		0-06	2	2.8	57.3	50.6	0.00628	5.04	2.47
Glucose.0	-0.146756	0.359872	0.448627	0.0472511		0-07	1	6	49.9	40.4	0.00245	3.22	3.24
HOMA.0	-0.106853	0.511662	0.676692	0.00141371		0-08	1	3.7	39.1	32.1	0.00583	4.11
Insulin.0	-0.127193	0.42215	0.655621	0.00125279		0-09	2	4.4	38.4	43.3	0.00467	3.46
T.Chol.0	-0.117176	0.465631	-0.264662	0.258367		0-10	1	6.8	40.5	33.5	0.00885	5.64	3.1
LDL.0	-0.134619	0.407565	-0.0256121	0.914644		0-11	2	4.6	77.1	59.3	0.00248	6.42	0.85
HDL.0	-0.0471291	0.769825	-0.0955966	0.688484		0-12	1	4.7	51.2	38.7	0.00925	2.39	3.93
Trigl..0	-0.13067	0.415462	-0.124906	0.599798		0-13	1	2	43.6	36.9	0.00241	3.69
Adiponectin.0	0.392965	0.0317006	0.094836	0.682609		0-14	1	9.3	46.1	35.7	0.01227	5.98	2.5
BNP.0	0.0502381	0.764534	0.0496241	0.836247		0-15	2	3.8	63.9	49.5	0.00221	4.57
Fettmasse.0	0.429871	0.00563334	0.245113	0.296235		0-16	2	7.7	41.9	42.6	0.00241	3.06
Fettmasse.0.1	0.344436	0.0295245	-0.0541353	0.821361		0-17	1	5	48	38.1	0.00327	7.08	2.78
BCM.0	-0.093989	0.564028	0.0813254	0.73322		0-18	2	3	45.7	45.9	0.0069	6.1	0
BCM.0.1	-0.375006	0.0171127	-0.161715	0.495777		0-19	2	9.1	76.2	57.3	0.02623	4.27	4.21
GU.0	-0.093989	0.564028	0.0813254	0.73322		0-20	1	5.2	55.1	40.8	0.00407	7.63	0.38
Adip.Size.0.	-0.209678	0.188256	0.692208	0.000711736		0-21	1	4.4	54.4	41.5	0.01536	6.44	3.03
Zeb1.0.in.SVF	1	0	0.233351	0.351387		0-22	1	2.59	40.6	33.5	0.00165		1.02
RORg.0.in.SVF	0.233351	0.351387	1	3.95022e-06		0-23	2	3.37	47.9	47.2	0.01265		3.43
PPARg.0.in.SVF	0.188325	0.310307	-0.0480519	0.836787		0-24	2	4.6	53.1	47.2			0.02
Tusc5.0.in.MA	0.257803	0.12901	-0.220588	0.393394		0-25	2	3.3	51.9	48.7
Differentiation.0	0.624542	7.88721e-05	-0.6	0.0204212		0-26	2	5	46.7	44.6			2.07
basal	0.137326	0.586867	0.276623	0.223944		0-27	1	5.7	40.9	35.3	0.00406		1.7
isop	-0.297367	0.230763	0.0506494	0.827972		0-28	2	3.25	-	-	0.00552		2.33
rel..Ins.Supr	0.137326	0.586867	0.074026	0.749676		0-29	1	17.3					1.75
rel..Isop..Activ.	-0.206505	0.410994	-0.253247	0.266812		0-30	1	3.4	74.6	40.4			1.65
						0-31	2	3.5	53.6	47.9	0.0044		3.42
						0-32	1	5.3	67.7	44.6			0.25
						0-33	1	3.7	39.2	31.2	0.00118		0
						0-34	1	5	48.5	39			0.01
						0-35	2	6.1	73.5	53.6			0.99
						0-36	2	7	81.8	59.3			0.06
						0-37	2	4.6	44.3	43.4	0.00211		0.74
						0-38	2	6.6	80.2	56.1			2
						0-39	2	4.4	55.9	47.3	0.01769		4.17
						0-40	2	7.8	62.4	54.3	0.00669		3.54
						0-41	2	2.9	119.8	61.4			1.04
						0-42	2	7	105.6	60.4	0.02134		5.69
						0-43	2	1.9
						0-44	2	7.6
						0-45	2		61	48.1
						0-46	2		44.9	48.3	0.00152		0.91
						0-47	2		49.1	47.7	0.0075		3.02
						0-48	2		41.2	42.9	0.0011		2.08
						0-49	2		53.8	47.2			1.82
						0-50	2		75.6	51.4			3.5
						0-51	2		55	46.2	0.00466		0.38
						0-52	2		50.9	48.7	0.00122		0.82
						0-53	2		46.8	44.6	0.01768
						0-54	1		40.6	32.5			2.98
						0-55	2		44.9	43.8	0.00139		1.39
						0-56	2		74.7	55.2	0.01496		3.04
						0-57	2		41.7	44.6	0.00345		0.42
						0-58	1		75.3	47.1
						0-59	2		49.5	47.2	0.0122		3.05
						0-60	1		46.2	37.3			3.4
						0-61	2		66	52.9	0.01854		3.45
						0-62	2		48.7	47.5	0.00161		2.85
