# Supplementary material for: Identification of the transcription factor ZEB1 as a central component of the adipogenic gene regulatory network
Source: eLife journal article supplement (doi:10.7554/elife.03346), 2014-08-26
Supplement: supp [file elife_poa_e03346_Supplementary_file_9.xlsx]

## Sheet: Table 9 - qpcr primers
Gene target	Target gene species	Forward sequence	Reverse sequence
Pparg2	Mouse	CACCAGTGTGAATTACAGCAAATC	AGCTGATTCCGAAGTTGGTG
Cebpa	Mouse	CAAGAACAGCAACGAGTACCG	GTCACTGGTCAACTCCAGCAC
AdipoQ	Mouse	TGGGGACCACAATGGACTCTA	TGGGCTATGGGTAGTTGCAGT
Ebf1	Mouse	TACAGCAATGGGATACGGA	GGCCTTCATACACTATGGC
Snai1	Mouse	GAAGATGCACATCCGAAGC	GAATGGCTTCTCACCAGTG
Snai2	Mouse	TGCAAGATCTGTGGCAAGG	CAGTGAGGGCAAGAGAAAGG
Twist1	Mouse	AGCTACGCCTTCTCCGTCT	TCCTTCTCTGGAAACAATGACA
Zfp423	Mouse	GATCACTGTCAGCAGGACTT	TGCCTCTTCAAGTAGCTCA
Zfp521	Mouse	GGCTGTTCAAACACAAGCG	GCACATTTATATGGCTTGTTG
Zeb1	Mouse	CAGACCAGACAGTATTACCAG	CGTTGTCTTTCACGTTGTC
Hprt1	Mouse	ATACCTAATCATTATGCCGAGG	AGCAAGTCTTTCAGTCCTG
Zeb1	Human	CAGTGAAAGAGAAGGGAATGCT	CTTCAGGCCCCAGGATTT
Hprt1	Human	CGAGCAAGACGTTCAGTCCT	TGACCTTGATTTATTTTGCATACC
Primer Name ChIP-qPCR	Genomic target	Forward sequence	Reverse sequence
1	chr6:115421049-115421140	GGGCTCTTTTAAAGTCCACAAG	ACCTAGCTGTGCCAAACTGC
2	chr6:115519550-115519643	GGCGTTGCATCACATTCTTAG	GGAAGTGGAAAAGCAGCAAT
3	chr18:52529589-52529664	AAGCGCACAGAGTCTGGAGTA	ACGGCTTGTGTAACTGCAAA
4	chr2:167690109-167690171	TGATGCAATCCGGATCAA	CACGTGTGTTGCGTCAGTC
5	chr6:115601947-115602008	TCTGAGGTTTCAGTGCGACTC	GGTGACCTGCTTGGTGCT
6	chr6:115676564-115676648	CACTCGTCTCCACGACCTG	AGCCGAGTTTTAAGCGGACT
7	chr9:50752802-50752867	CCTCTAGGACTCCACAAAGAGTTAAT	GGGCAGGGACTGGAATCT
8	chr7:35042939-35043012	TTCTTGGCCCTCAAACAGTC	TACTTGTGGCTCCTCCAAGG
9	chr4:89311190-89311253	TGAAAAAGTTGTGCCTCTGC	TGCAGGCCTGAGCTAAATAAA
10	chr17:29093509-29093584	CTCAGCTCTAACTGTACTGTTGTTCA	CTGGGCTATTCTCTTGTCACG
11	chr19:5802715-5802775	TCACTCCACCGGAACCTAGT	GAGGAACTATTTTTCTTCCTTCACC
12	chr5:115489320-115489379	AGAGAATGCCAAGAGAATGTCC	ACCCTCCATTATCGCTACCC
Ctrl1	chr10:25156507-25156581	CACACAGCTGACCTCCAGAA	AGTGGCAAGGTCTCTGCTTC
Ctrl2	chr11:96195240-96195310	GGGTGCTAGCCTTCCTGACT	TCCAAGGTTCTCCCGACATA
Ctrl3	chr3:107192933-107192992	AGATACCACCTCAGGTTAGGTCA	CCAGGCAGGCTAGAGTGAGT
13	chr6:115421822-115421891	GCAACGTTTTCCTTGTAATGTACC	GACAAAATGGTGTGTCATAATGC
14	chr6:115424719-115424778	TTGAAACCAGAGTCCCTCAGA	CCCCCATAGAAGTGGTATGC
15	chr6:115463051-115463124	CAATGATTCATCCTGTCATTCC	TCTCCTTCTCGGCCTGTG
17	chr18:52509402-52509471	TGCCAGGACATTGAGAAAGA	CCTCACATACGGAGTTGCAC
16	chr7:35076728-35076787	GGATCACGGGTGACAGTAGC	CGCTTCCTAAAAGGCAGGA
Ctrl4	chr6:115429617-115429691	TAGATCACGCAGGCCTCAA	GAAGGTGTAGTGTCACGTGCTT
Ctrl5	chr6:115320010-115320073	CCATCCTGTTCAATGTGAATGA	AAACTTAATCCTTACAATGGCTGTG
Ctrl6	chr15:74296962-74297012	TGGTAGCCTCAGGAGCTTGC	ATCCAAGATGGGACCAAGCTG
