# Supplementary figures and images for: Identification of the transcription factor ZEB1 as a central component of the adipogenic gene regulatory network
Source: eLife journal article supplement (doi:10.7554/elife.03346), 2014-08-26

**A**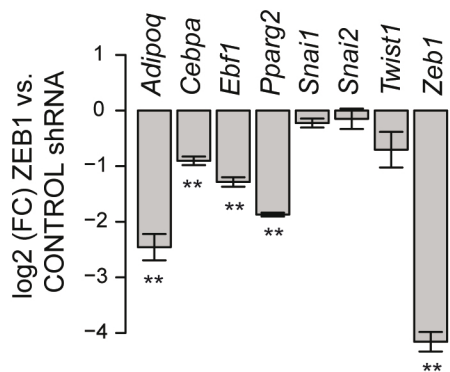**B**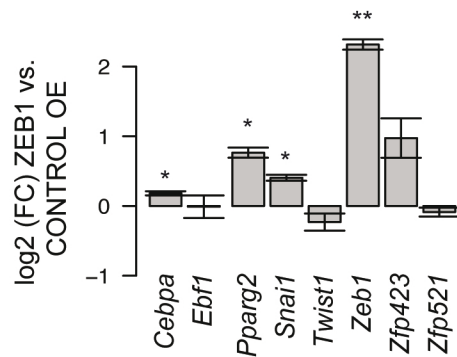**C**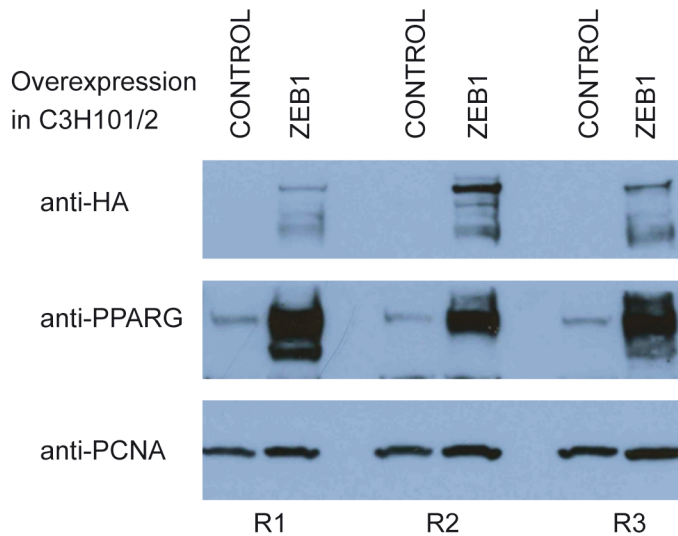

Supplement: supp [file elife-03346-supp-v1.zip]

CONTROL

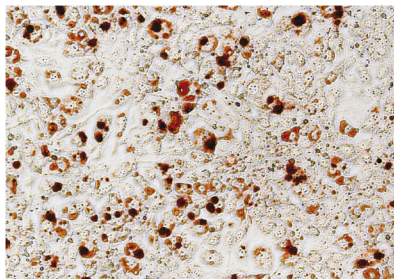

PPARG

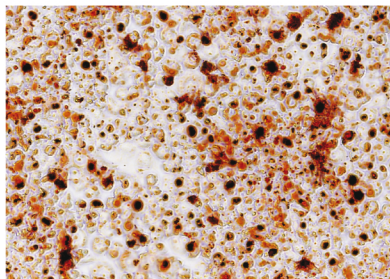

ZEB1

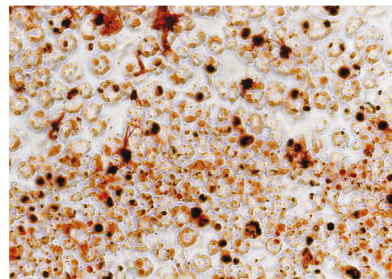

ZFP202

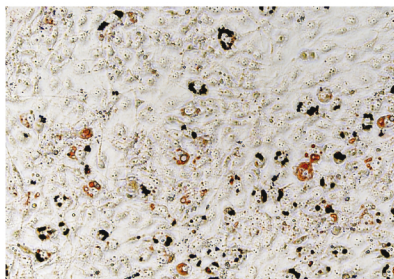

SEBOX

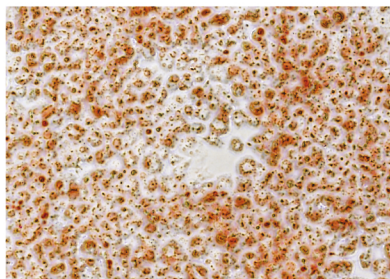

ZFP30

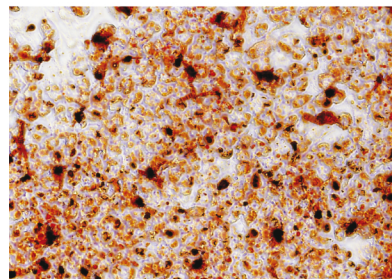

ZFP277

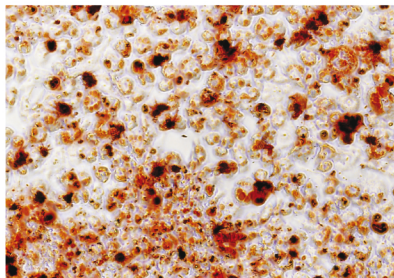

ZBTB43

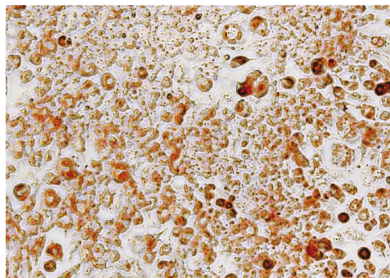

ZFP799

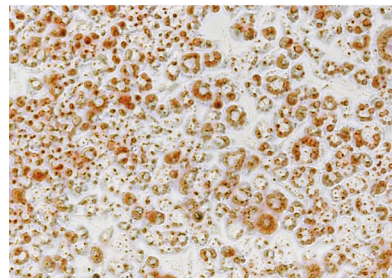

ATOH8

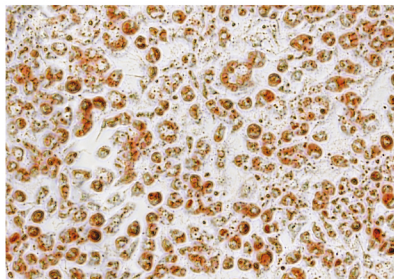

200  $\mu$ m

Supplement: supp [file elife-03346-supp-v1.zip]

**A**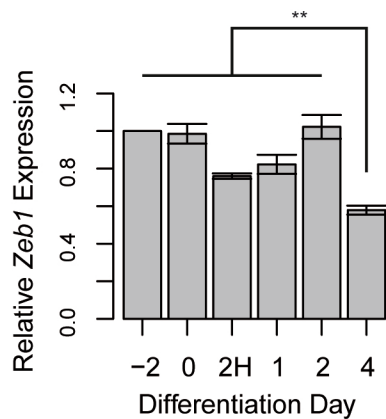**B**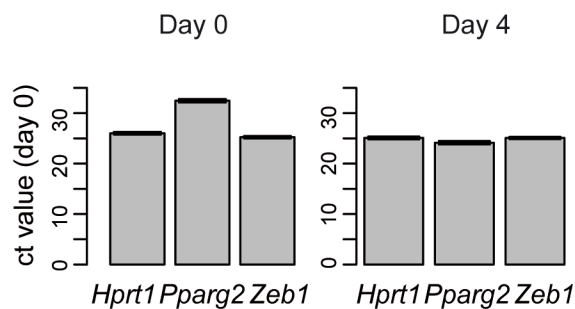**C**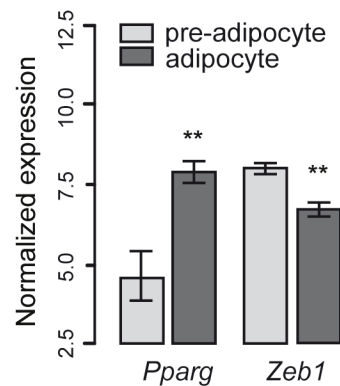**D**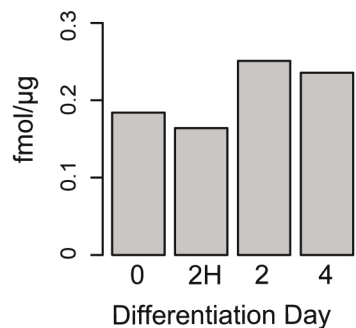**E**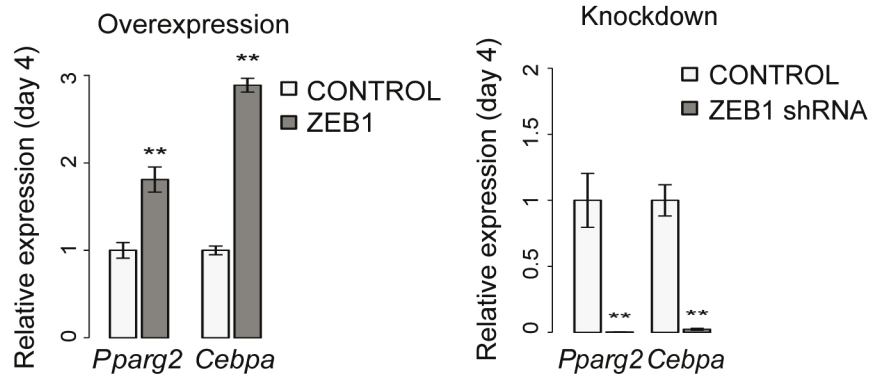**F**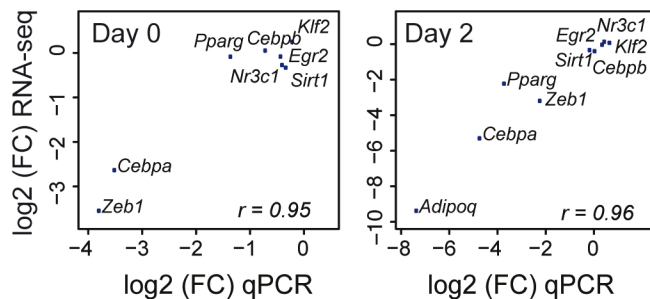**G**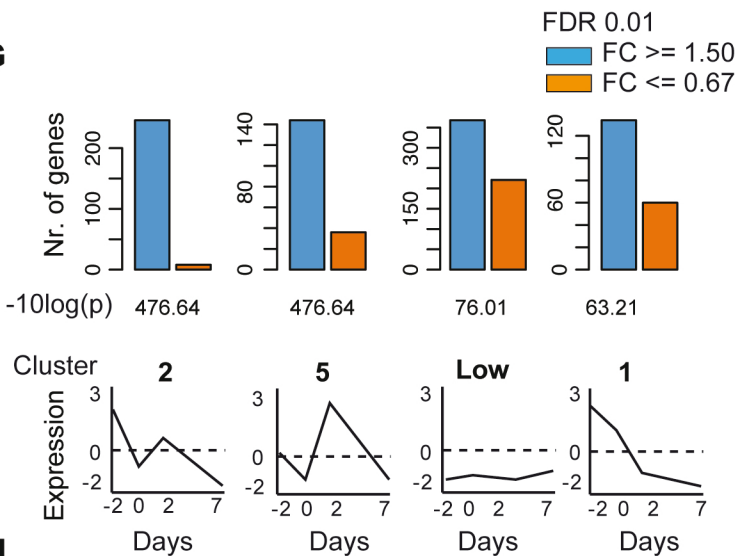**H**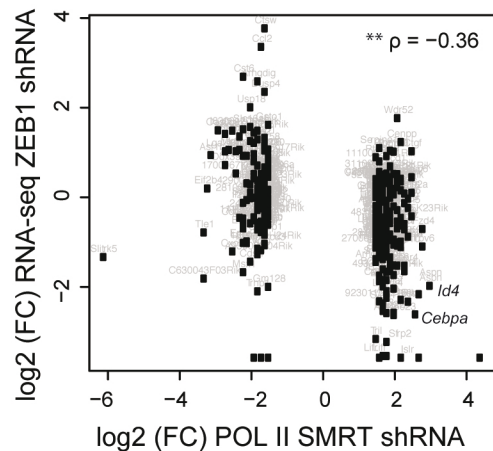**I**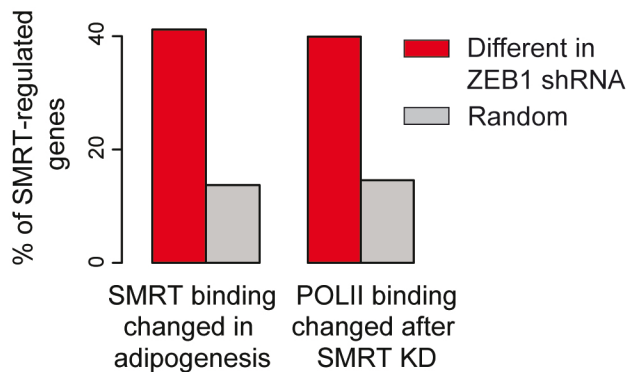

Supplement: supp [file elife-03346-supp-v1.zip]

**A**

750 *Mus musculus* TFs fully sequence-verified

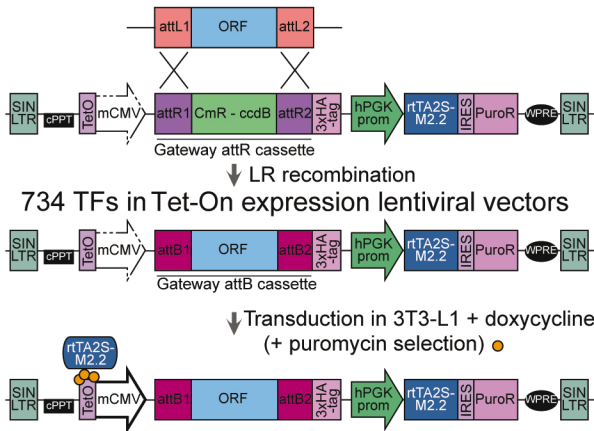**B**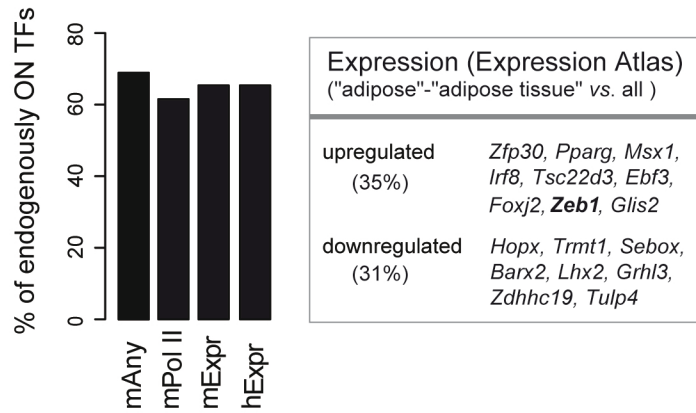**C**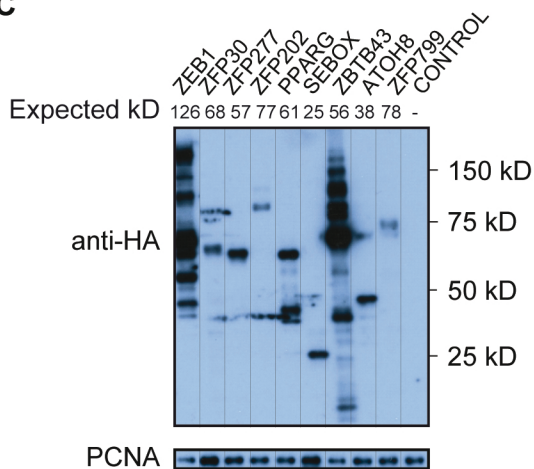**D**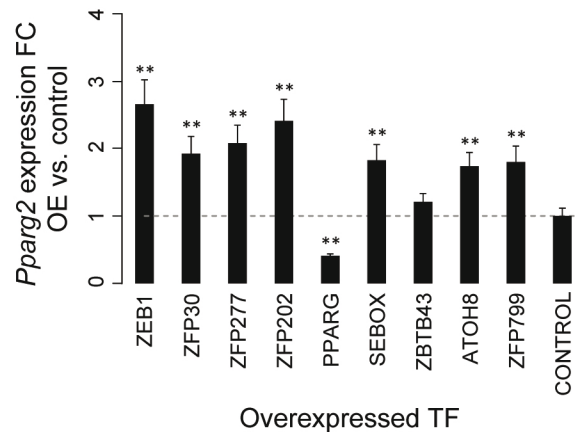**E**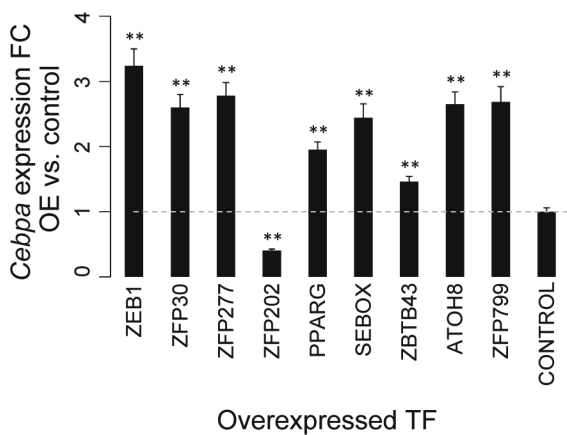**F**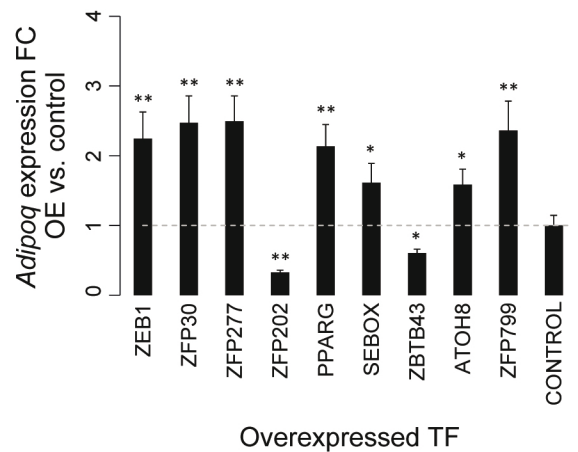**G**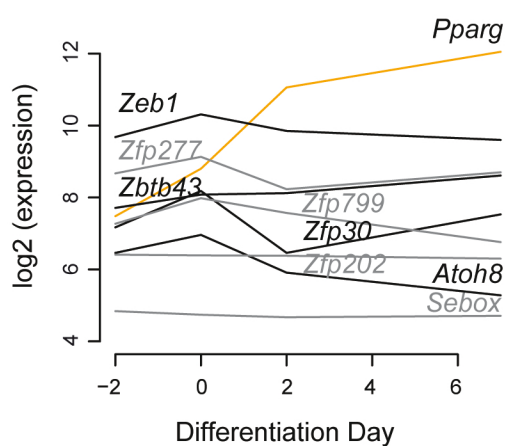**H**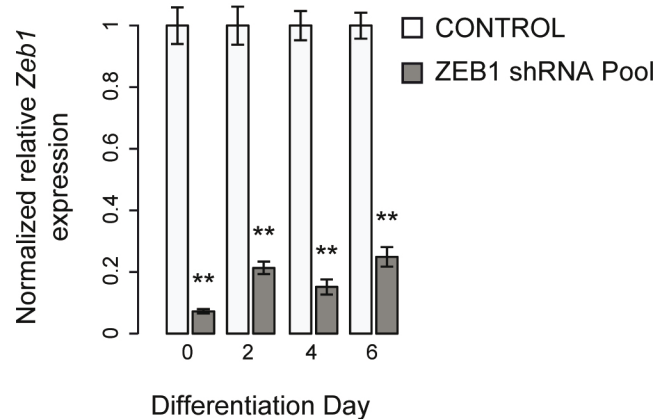

Supplement: supp [file elife-03346-supp-v1.zip]

**A**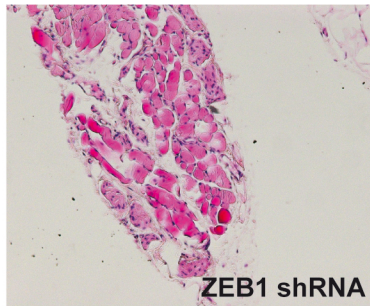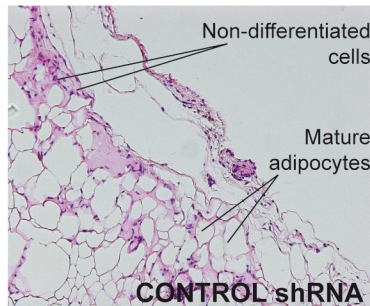**B**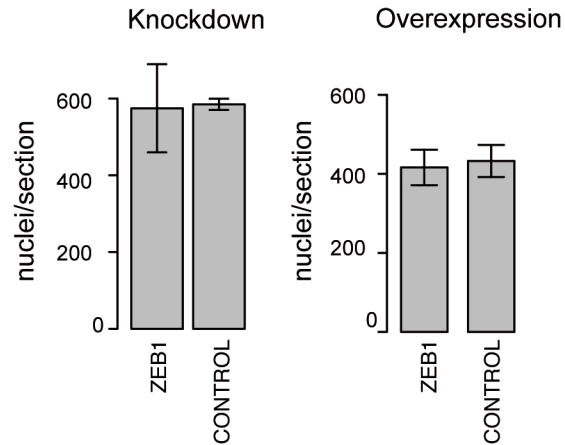

Supplement: supp [file elife-03346-supp-v1.zip]

**A**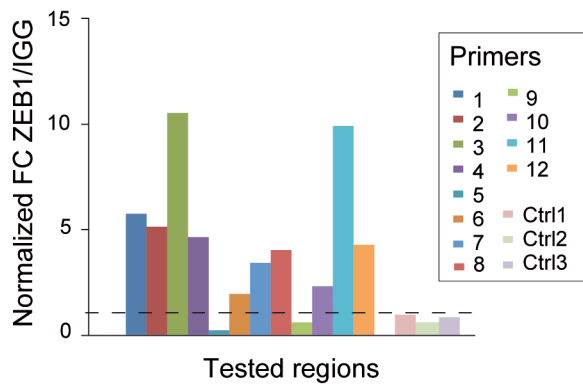**B**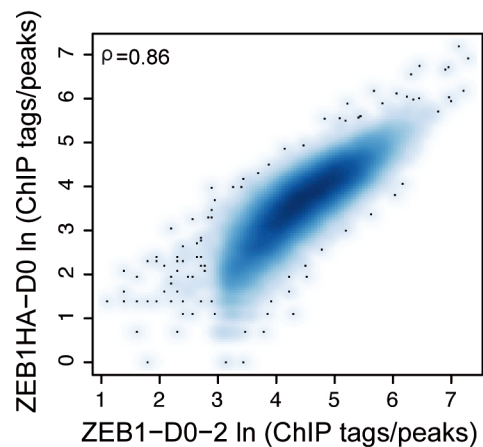**C**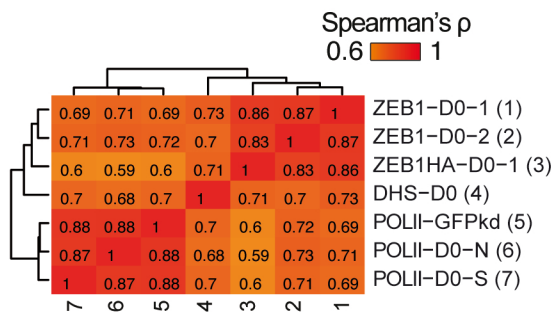**D**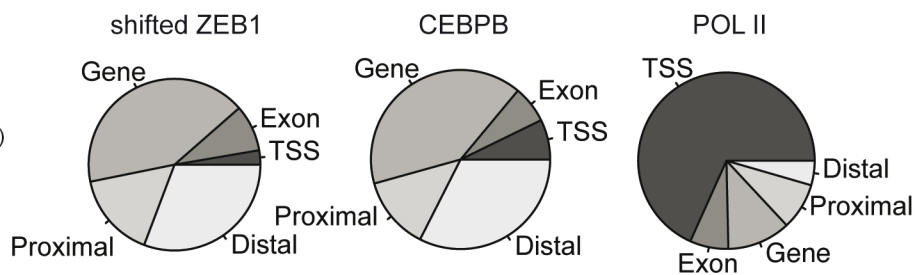**E**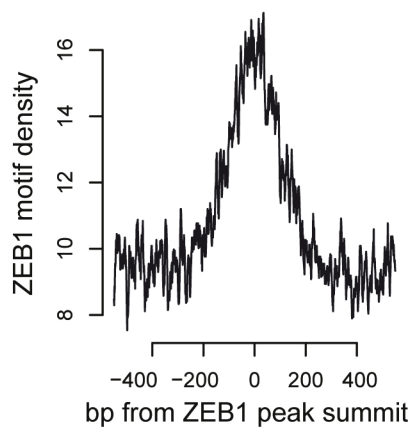**F**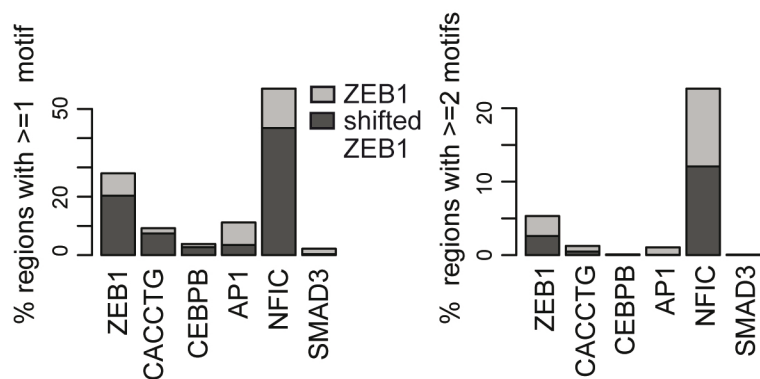**G**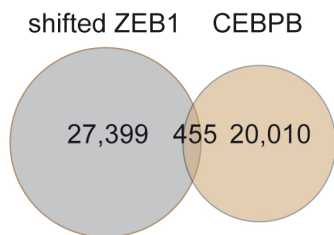**H**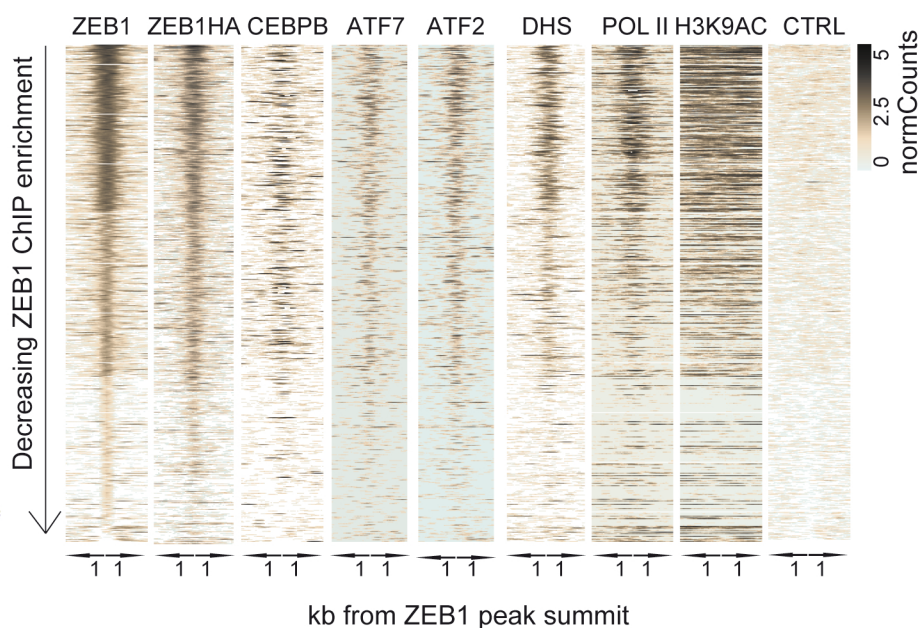**I**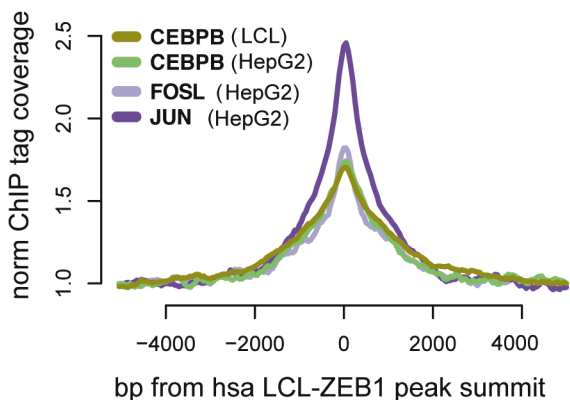

Supplement: supp [file elife-03346-supp-v1.zip]

**A**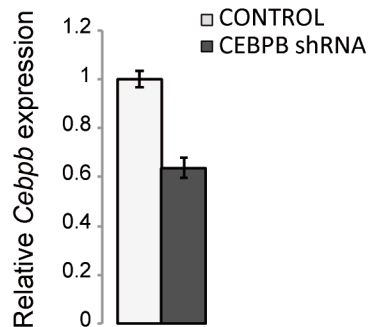**B**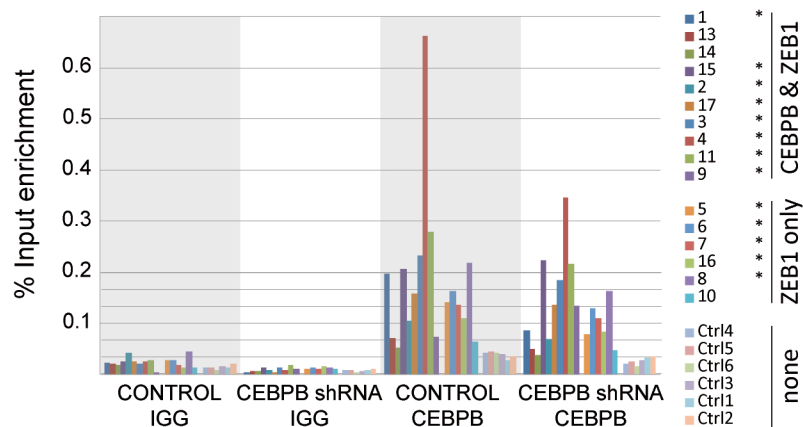**C**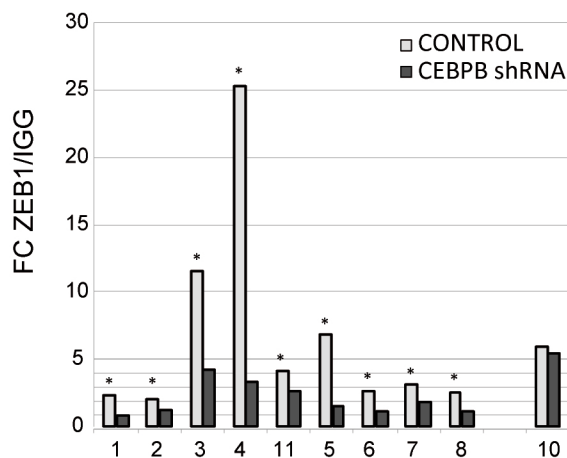**D**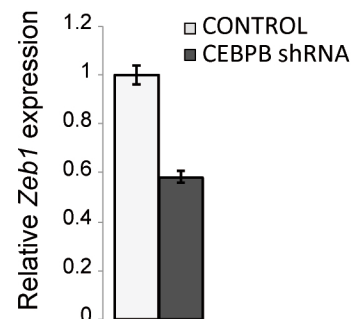**E**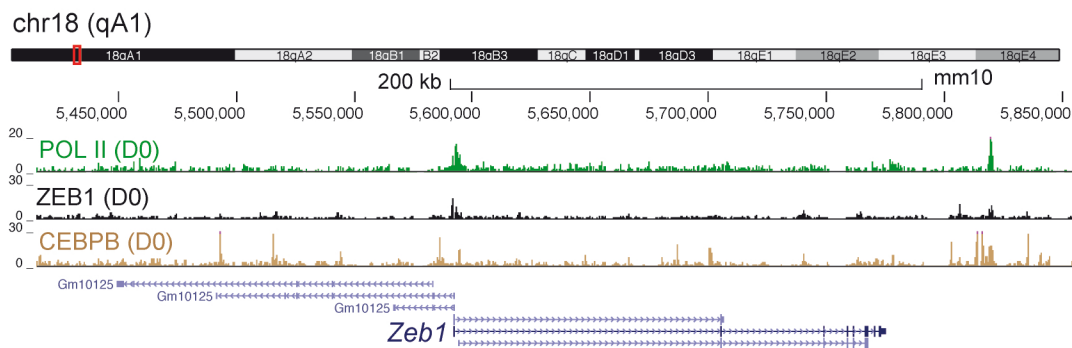

Supplement: supp [file elife-03346-supp-v1.zip]
